# Supplementary material
Source: PubMed Central journal article supplement (PMC9202004)
Supplement: NIHMS1793241-supplement-supinfo2.pdf [file NIHMS1793241-supplement-supinfo2.pdf]

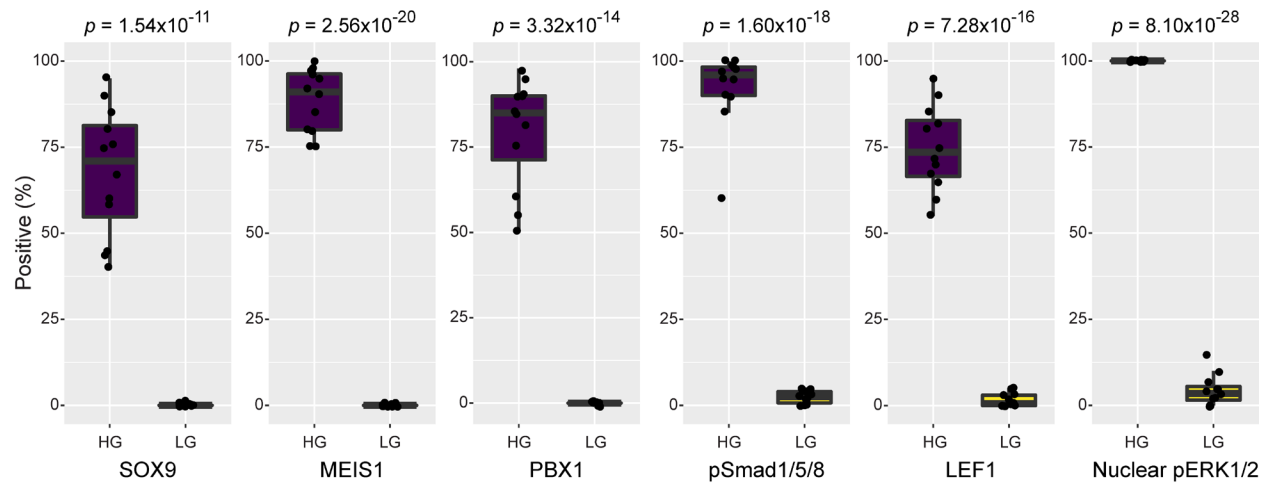

**Supplementary Figure 2** Quantification of nuclear immunoreactivity of SOX9, MEIS1, PBX1, phospho-Smad1/5/8 (pSmad1/5/8), LEF1, and phospho-ERK1/2 (pERK1/2) in high-grade (HG) and low-grade (LG) areas in the 12 desmoplastic infantile astrocytoma/ganglioglioma (DIA/DIG). Five hundred nuclei of each sample were quantified for percentage calculation. Statistic analysis was done by analysis of variance (ANOVA).
