# Supplementary material
Source: PubMed Central journal article supplement (PMC9202004)
Supplement: NIHMS1793241-supplement-supinfo3.pdf [file NIHMS1793241-supplement-supinfo3.pdf]

Show 8 entries

Search: 

| ID         | DMRindex   | CHR    | MAPINFO | Strand | Type | gene | feature | cgi     | feat.cgi |               |
|------------|------------|--------|---------|--------|------|------|---------|---------|----------|---------------|
| cg05825400 | cg05825400 | DMR_29 | 17      | 982115 | R    | II   | ABR     | Body    | shore    | Body-shore    |
| cg00905220 | cg00905220 | DMR_29 | 17      | 982154 | F    | II   | ABR     | Body    | shore    | Body-shore    |
| cg26867637 | cg26867637 | DMR_29 | 17      | 982395 | R    | II   | ABR     | TSS200  | shore    | TSS200-shore  |
| cg19476303 | cg19476303 | DMR_29 | 17      | 982397 | R    | II   | ABR     | TSS200  | shore    | TSS200-shore  |
| cg15474728 | cg15474728 | DMR_29 | 17      | 982497 | F    | II   | ABR     | TSS200  | shore    | TSS200-shore  |
| cg07149030 | cg07149030 | DMR_29 | 17      | 982503 | F    | II   | ABR     | TSS200  | shore    | TSS200-shore  |
| cg24521240 | cg24521240 | DMR_29 | 17      | 982555 | R    | II   | ABR     | TSS200  | shore    | TSS200-shore  |
| cg09434366 | cg09434366 | DMR_29 | 17      | 982586 | F    | II   | ABR     | ExonBnd | shore    | ExonBnd-shore |

Showing 1 to 8 of 8 entries

Previous  Next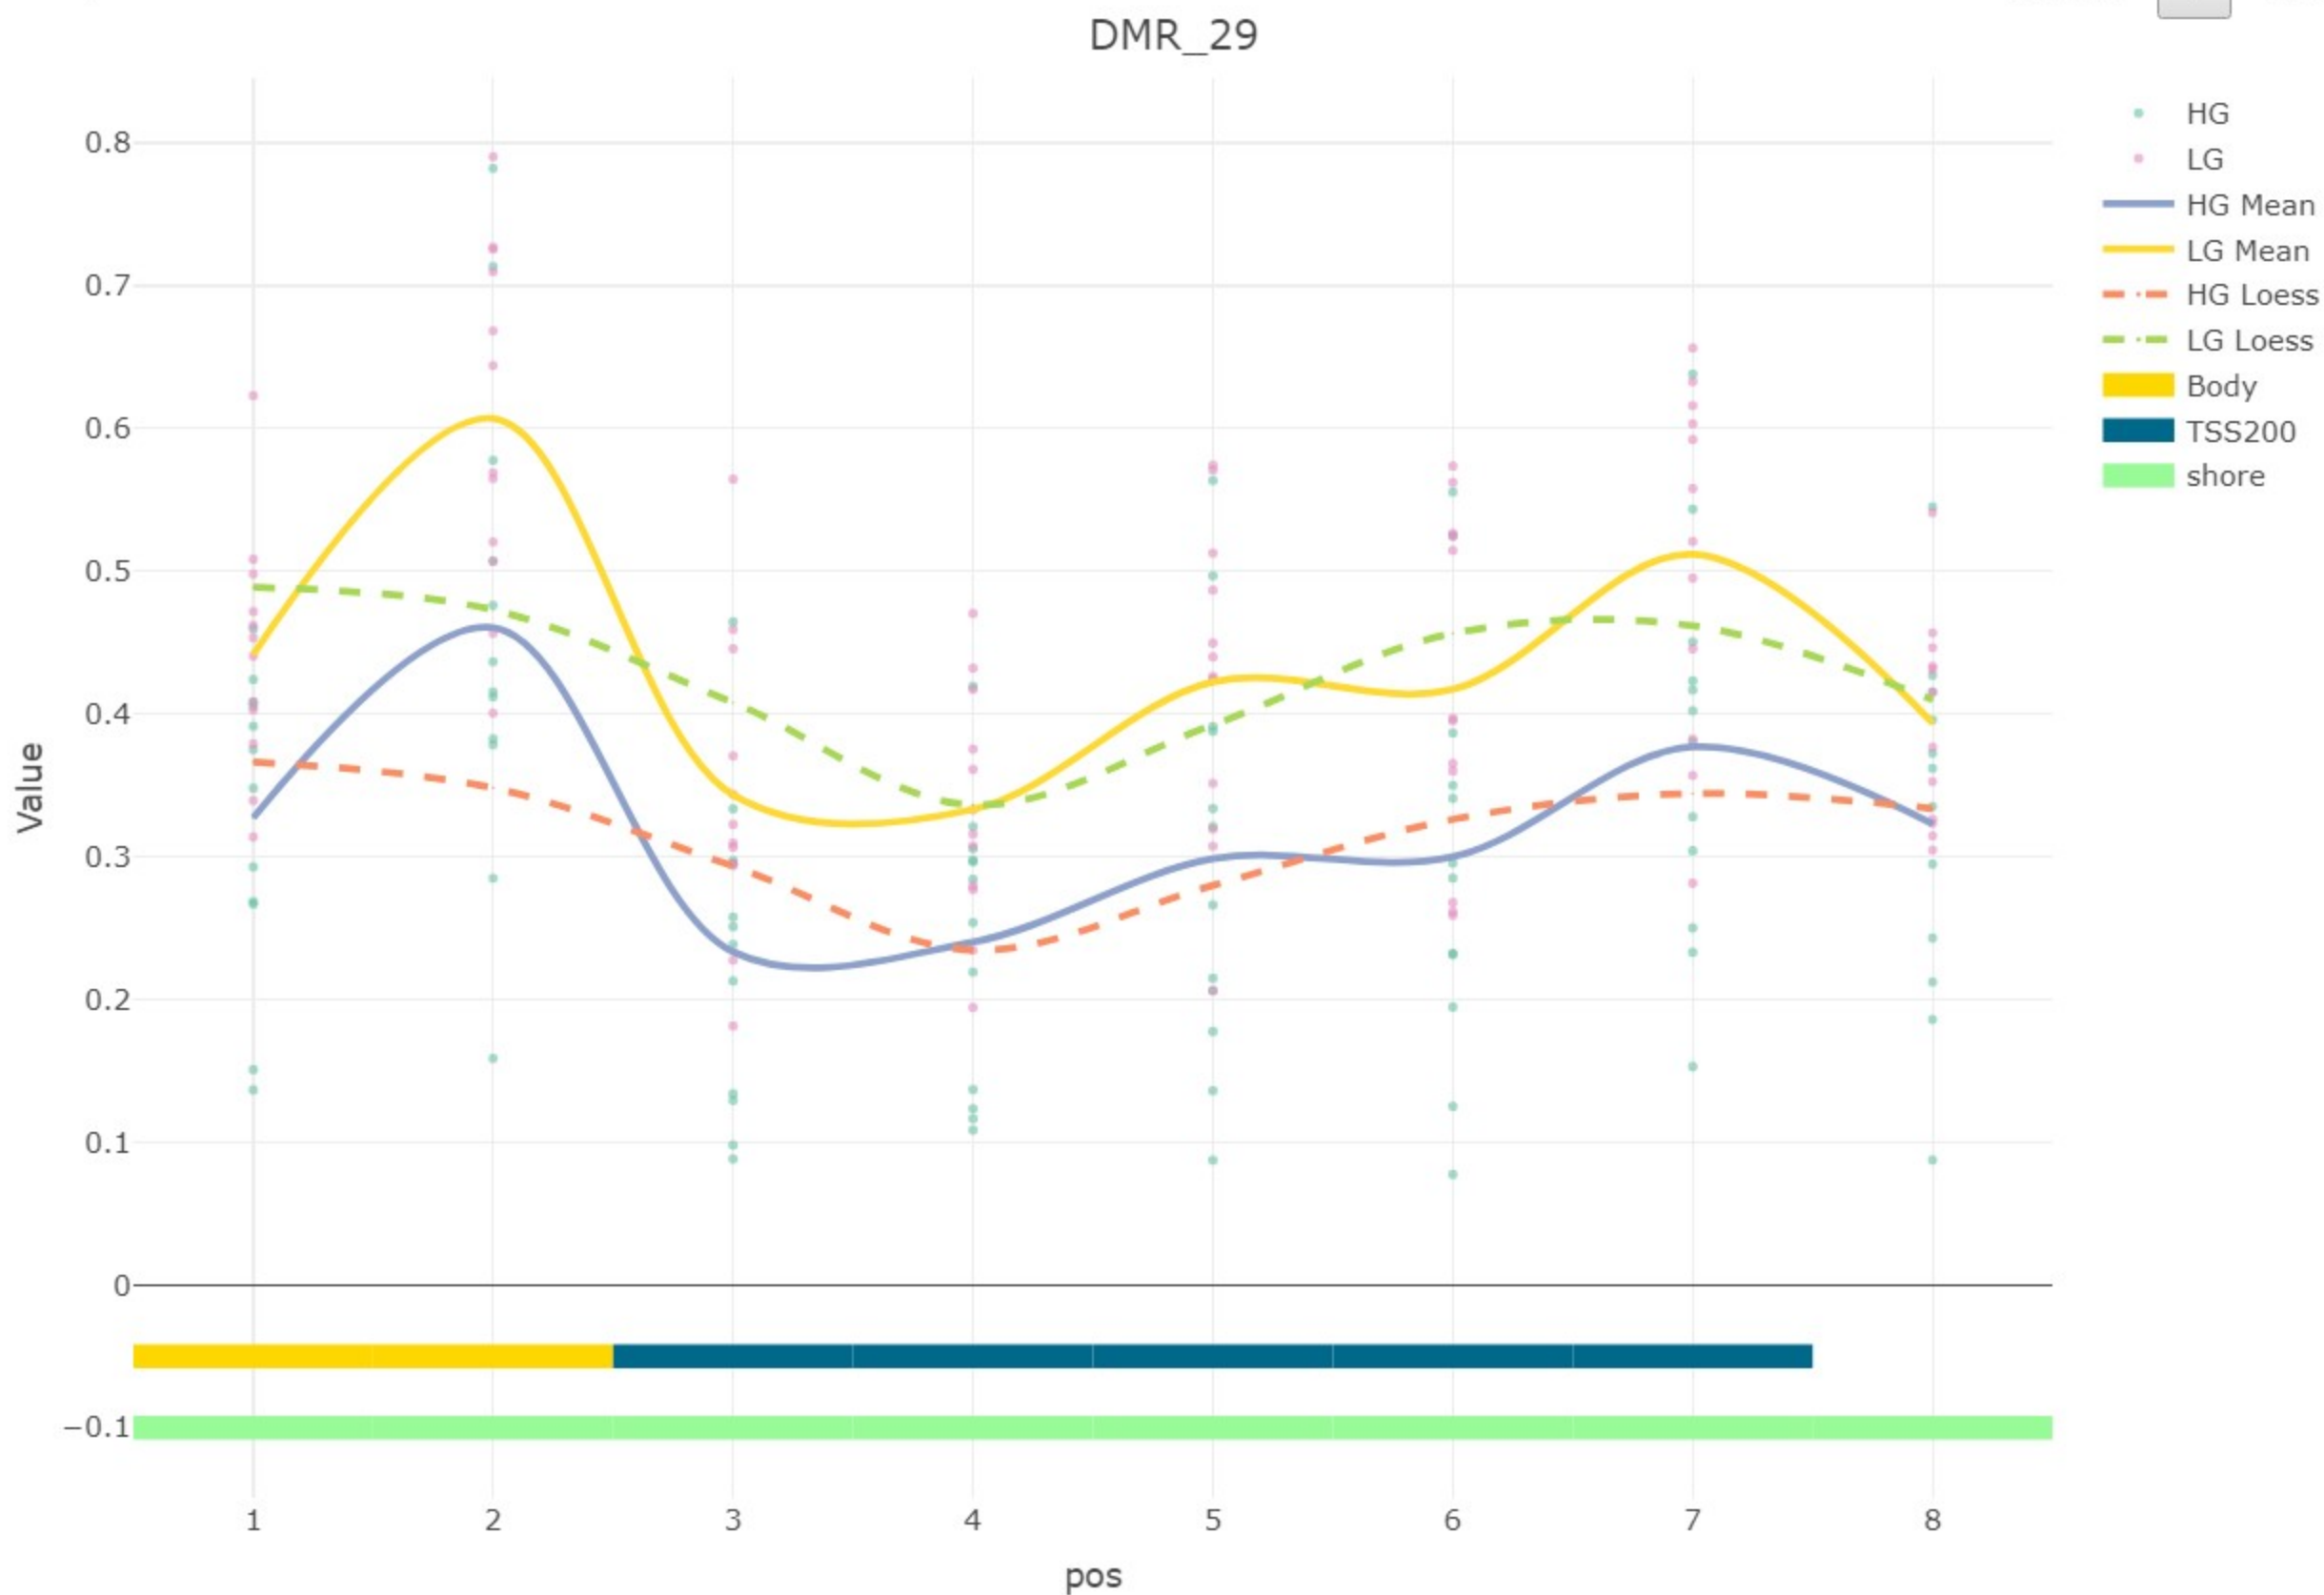

Show 8 entries

Search:

| ID         | DMRindex   | CHR    | MAPINFO | Strand  | Type | gene | feature | cgi    | feat.cgi |                |
|------------|------------|--------|---------|---------|------|------|---------|--------|----------|----------------|
| cg16429975 | cg16429975 | DMR_47 | 1       | 6445632 | F    | II   | ACOT7   | Body   | opensea  | Body-opensea   |
| cg23095988 | cg23095988 | DMR_47 | 1       | 6445804 | R    | II   | ACOT7   | Body   | opensea  | Body-opensea   |
| cg03499017 | cg03499017 | DMR_47 | 1       | 6445893 | F    | I    | ACOT7   | TSS200 | opensea  | TSS200-opensea |
| cg10163234 | cg10163234 | DMR_47 | 1       | 6445901 | F    | II   | ACOT7   | TSS200 | opensea  | TSS200-opensea |
| cg19056927 | cg19056927 | DMR_47 | 1       | 6445909 | F    | II   | ACOT7   | TSS200 | opensea  | TSS200-opensea |
| cg06407172 | cg06407172 | DMR_47 | 1       | 6445916 | F    | II   | ACOT7   | TSS200 | opensea  | TSS200-opensea |
| cg25855436 | cg25855436 | DMR_47 | 1       | 6445975 | R    | II   | ACOT7   | TSS200 | opensea  | TSS200-opensea |

Showing 1 to 7 of 7 entries

Previous 1 Next

## DMR\_47

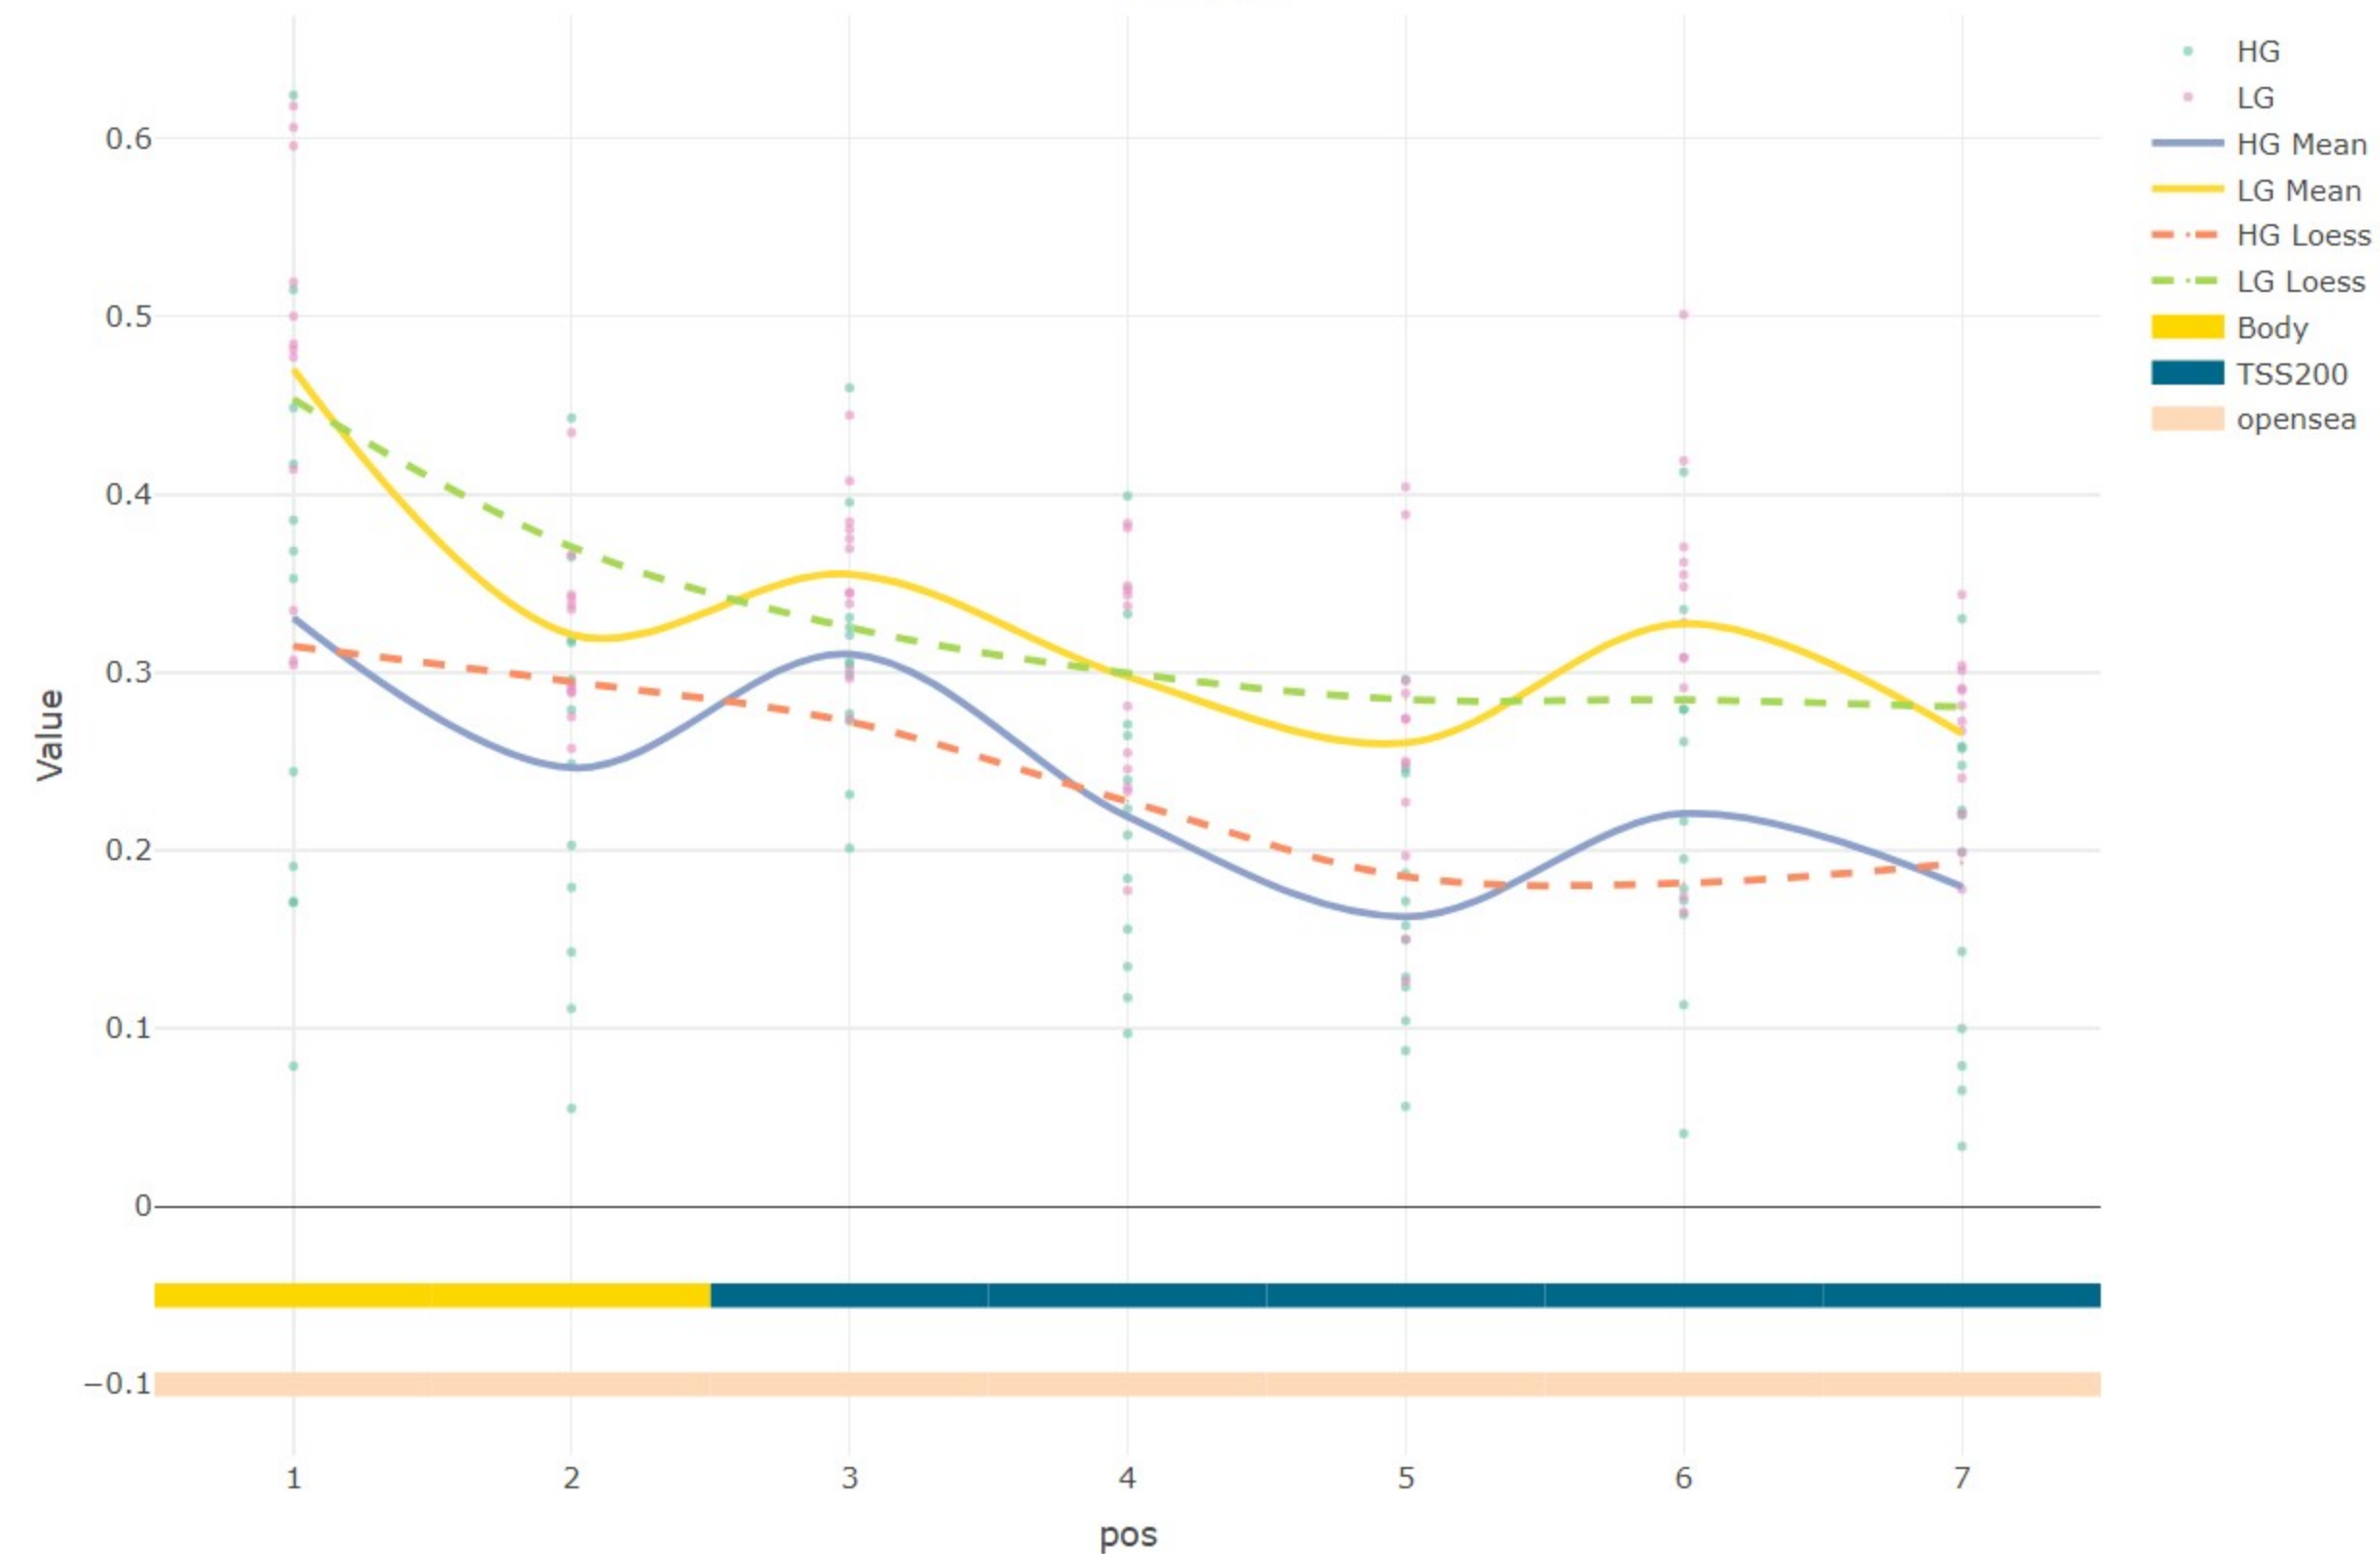

Show **10** entriesSearch: 

| ID         | DMRindex   | CHR    | MAPINFO | Strand   | Type | gene | feature | cgi     | feat.cgi |                 |
|------------|------------|--------|---------|----------|------|------|---------|---------|----------|-----------------|
| cg17607722 | cg17607722 | DMR_26 | 17      | 54230419 | R    | II   | ANKFN1  | TSS1500 | opensea  | TSS1500-opensea |
| cg05422096 | cg05422096 | DMR_26 | 17      | 54230560 | R    | II   | ANKFN1  | TSS1500 | opensea  | TSS1500-opensea |
| cg10564180 | cg10564180 | DMR_26 | 17      | 54230594 | R    | I    | ANKFN1  | TSS1500 | opensea  | TSS1500-opensea |
| cg26231361 | cg26231361 | DMR_26 | 17      | 54230642 | R    | II   | ANKFN1  | TSS200  | opensea  | TSS200-opensea  |
| cg17024482 | cg17024482 | DMR_26 | 17      | 54230730 | F    | II   | ANKFN1  | TSS200  | opensea  | TSS200-opensea  |
| cg09980771 | cg09980771 | DMR_26 | 17      | 54230787 | R    | II   | ANKFN1  | TSS200  | opensea  | TSS200-opensea  |
| cg18851332 | cg18851332 | DMR_26 | 17      | 54230793 | R    | II   | ANKFN1  | TSS200  | opensea  | TSS200-opensea  |
| cg00840597 | cg00840597 | DMR_26 | 17      | 54230805 | R    | II   | ANKFN1  | TSS200  | opensea  | TSS200-opensea  |
| cg01748757 | cg01748757 | DMR_26 | 17      | 54230996 | F    | II   | ANKFN1  | Body    | opensea  | Body-opensea    |

Showing 1 to 9 of 9 entries

Previous **1** Next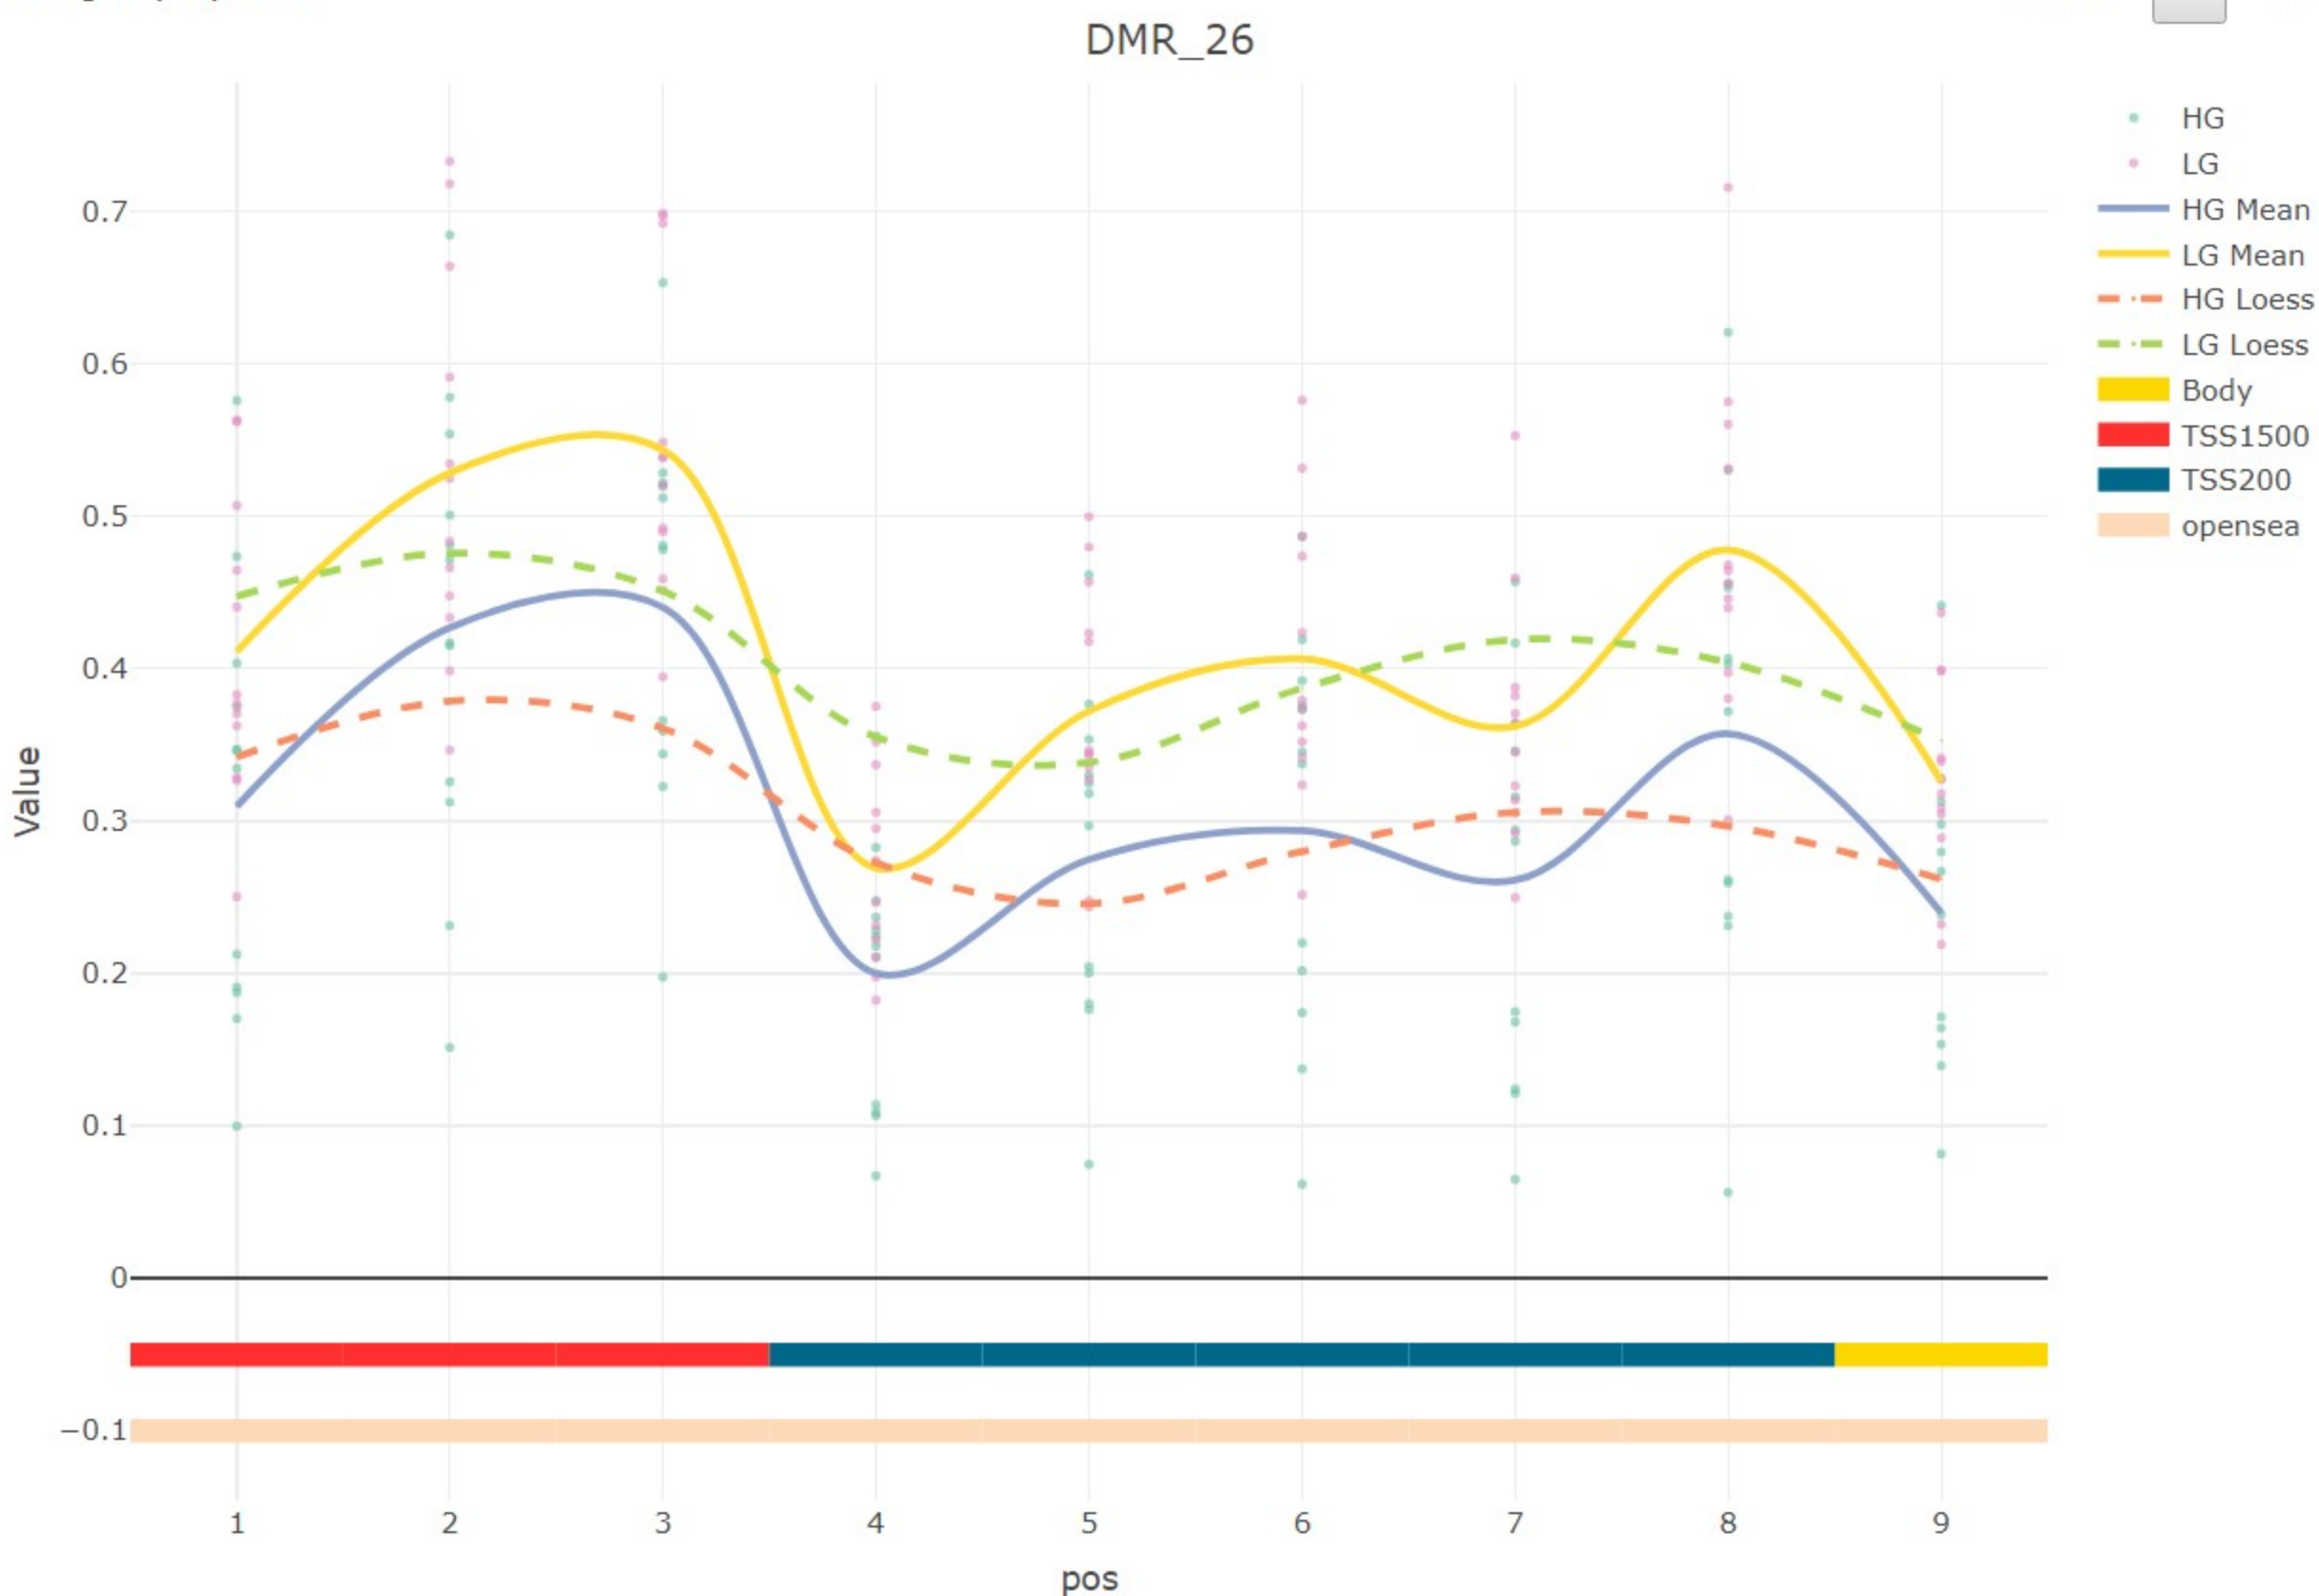

Show **10** entriesSearch: 

| ID         | DMRindex   | CHR    | MAPINFO | Strand   | Type | gene | feature | cgi     | feat.cgi |                 |
|------------|------------|--------|---------|----------|------|------|---------|---------|----------|-----------------|
| cg16084190 | cg16084190 | DMR_38 | 11      | 61716821 | F    | II   | BEST1   | TSS1500 | opensea  | TSS1500-opensea |
| cg09317928 | cg09317928 | DMR_38 | 11      | 61716830 | R    | II   | BEST1   | TSS1500 | opensea  | TSS1500-opensea |
| cg06068935 | cg06068935 | DMR_38 | 11      | 61717005 | R    | II   | BEST1   | TSS1500 | opensea  | TSS1500-opensea |
| cg23584647 | cg23584647 | DMR_38 | 11      | 61717191 | R    | II   | BEST1   | TSS200  | opensea  | TSS200-opensea  |
| cg15456821 | cg15456821 | DMR_38 | 11      | 61717225 | R    | II   | BEST1   | TSS200  | opensea  | TSS200-opensea  |
| cg09726693 | cg09726693 | DMR_38 | 11      | 61717395 | R    | II   | BEST1   | 1stExon | opensea  | 1stExon-opensea |
| cg05481452 | cg05481452 | DMR_38 | 11      | 61717684 | F    | II   | BEST1   | 5'UTR   | opensea  | 5'UTR-opensea   |
| cg11562596 | cg11562596 | DMR_38 | 11      | 61717766 | R    | II   | BEST1   | 5'UTR   | opensea  | 5'UTR-opensea   |
| cg20584555 | cg20584555 | DMR_38 | 11      | 61717780 | R    | II   | BEST1   | 5'UTR   | opensea  | 5'UTR-opensea   |

Showing 1 to 9 of 9 entries

Previous **1** Next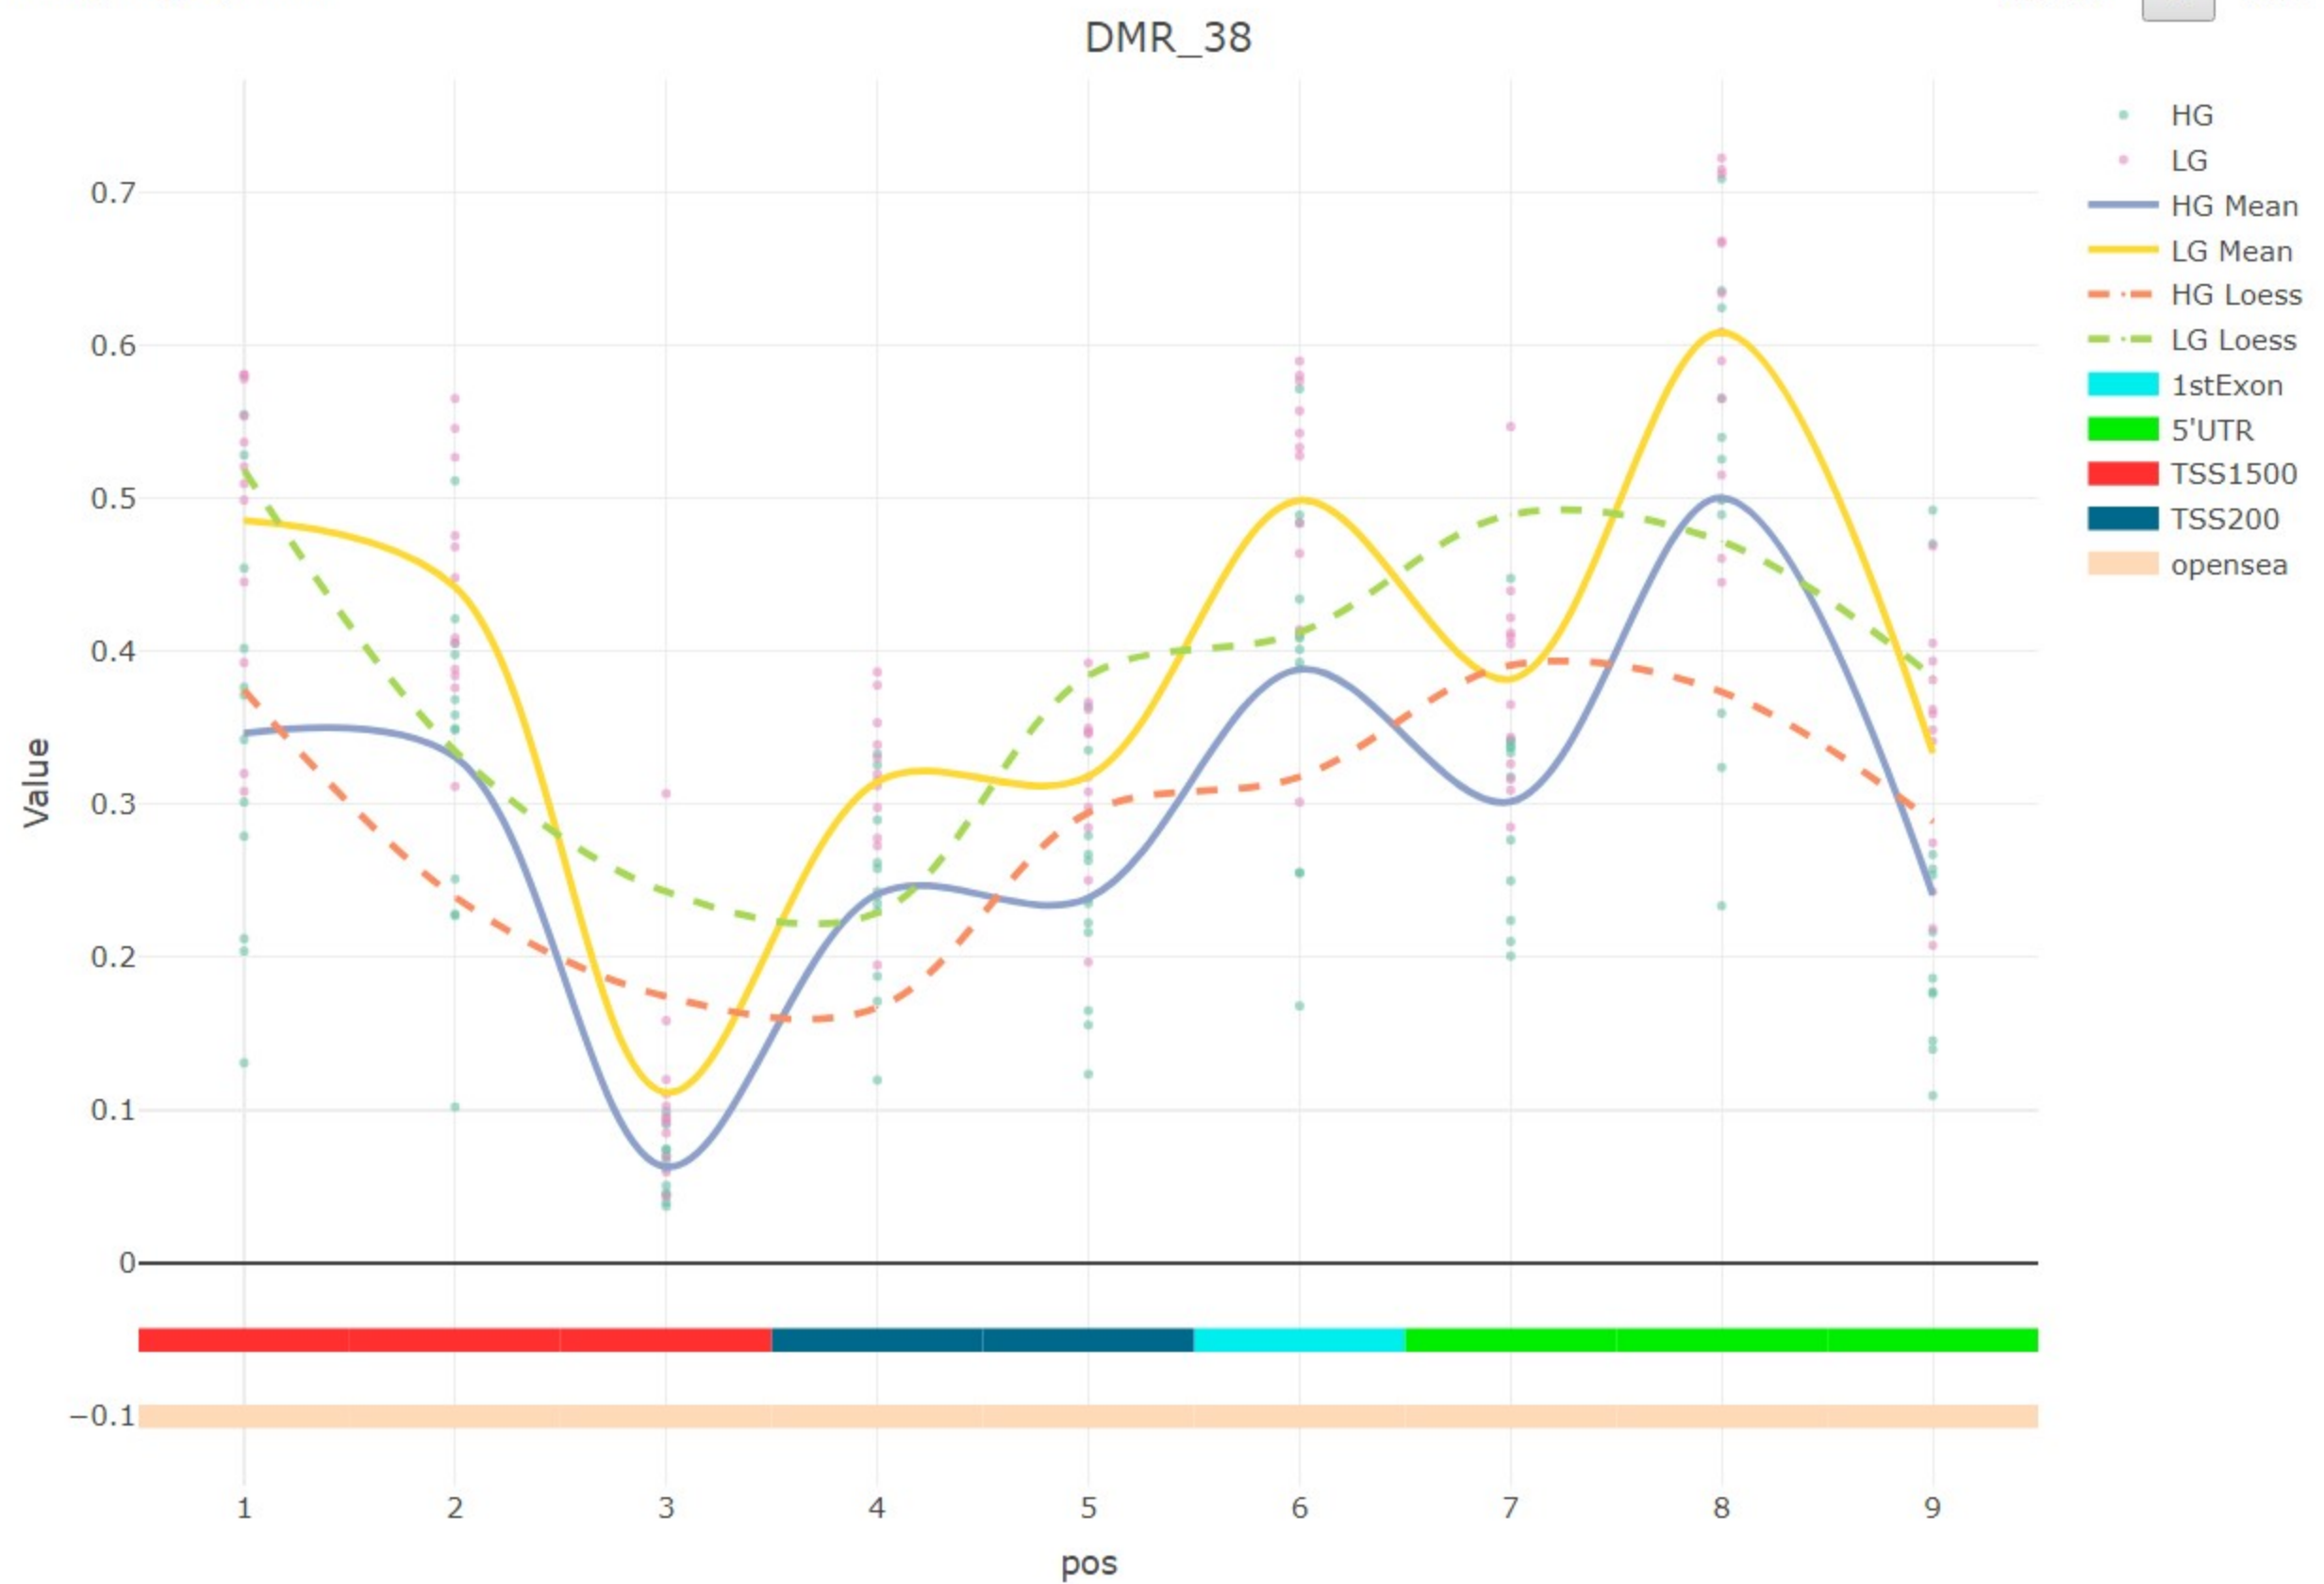

Show 8 entries

Search:

|            | ID         | DMRindex | CHR | MAPINFO | Strand | Type | gene | feature | cgi   | feat.cgi      |
|------------|------------|----------|-----|---------|--------|------|------|---------|-------|---------------|
| cg09032066 | cg09032066 | DMR_32   | 3   | 237955  | F      | II   | CHL1 | TSS1500 | shore | TSS1500-shore |
| cg07171710 | cg07171710 | DMR_32   | 3   | 237960  | F      | II   | CHL1 | TSS1500 | shore | TSS1500-shore |
| cg11165881 | cg11165881 | DMR_32   | 3   | 238048  | F      | II   | CHL1 | TSS1500 | shore | TSS1500-shore |
| cg10513594 | cg10513594 | DMR_32   | 3   | 238094  | R      | II   | CHL1 | TSS1500 | shore | TSS1500-shore |
| cg00891836 | cg00891836 | DMR_32   | 3   | 238134  | F      | II   | CHL1 | TSS1500 | shore | TSS1500-shore |
| cg00903242 | cg00903242 | DMR_32   | 3   | 238161  | R      | II   | CHL1 | TSS1500 | shore | TSS1500-shore |

Showing 1 to 6 of 6 entries

Previous

1

Next

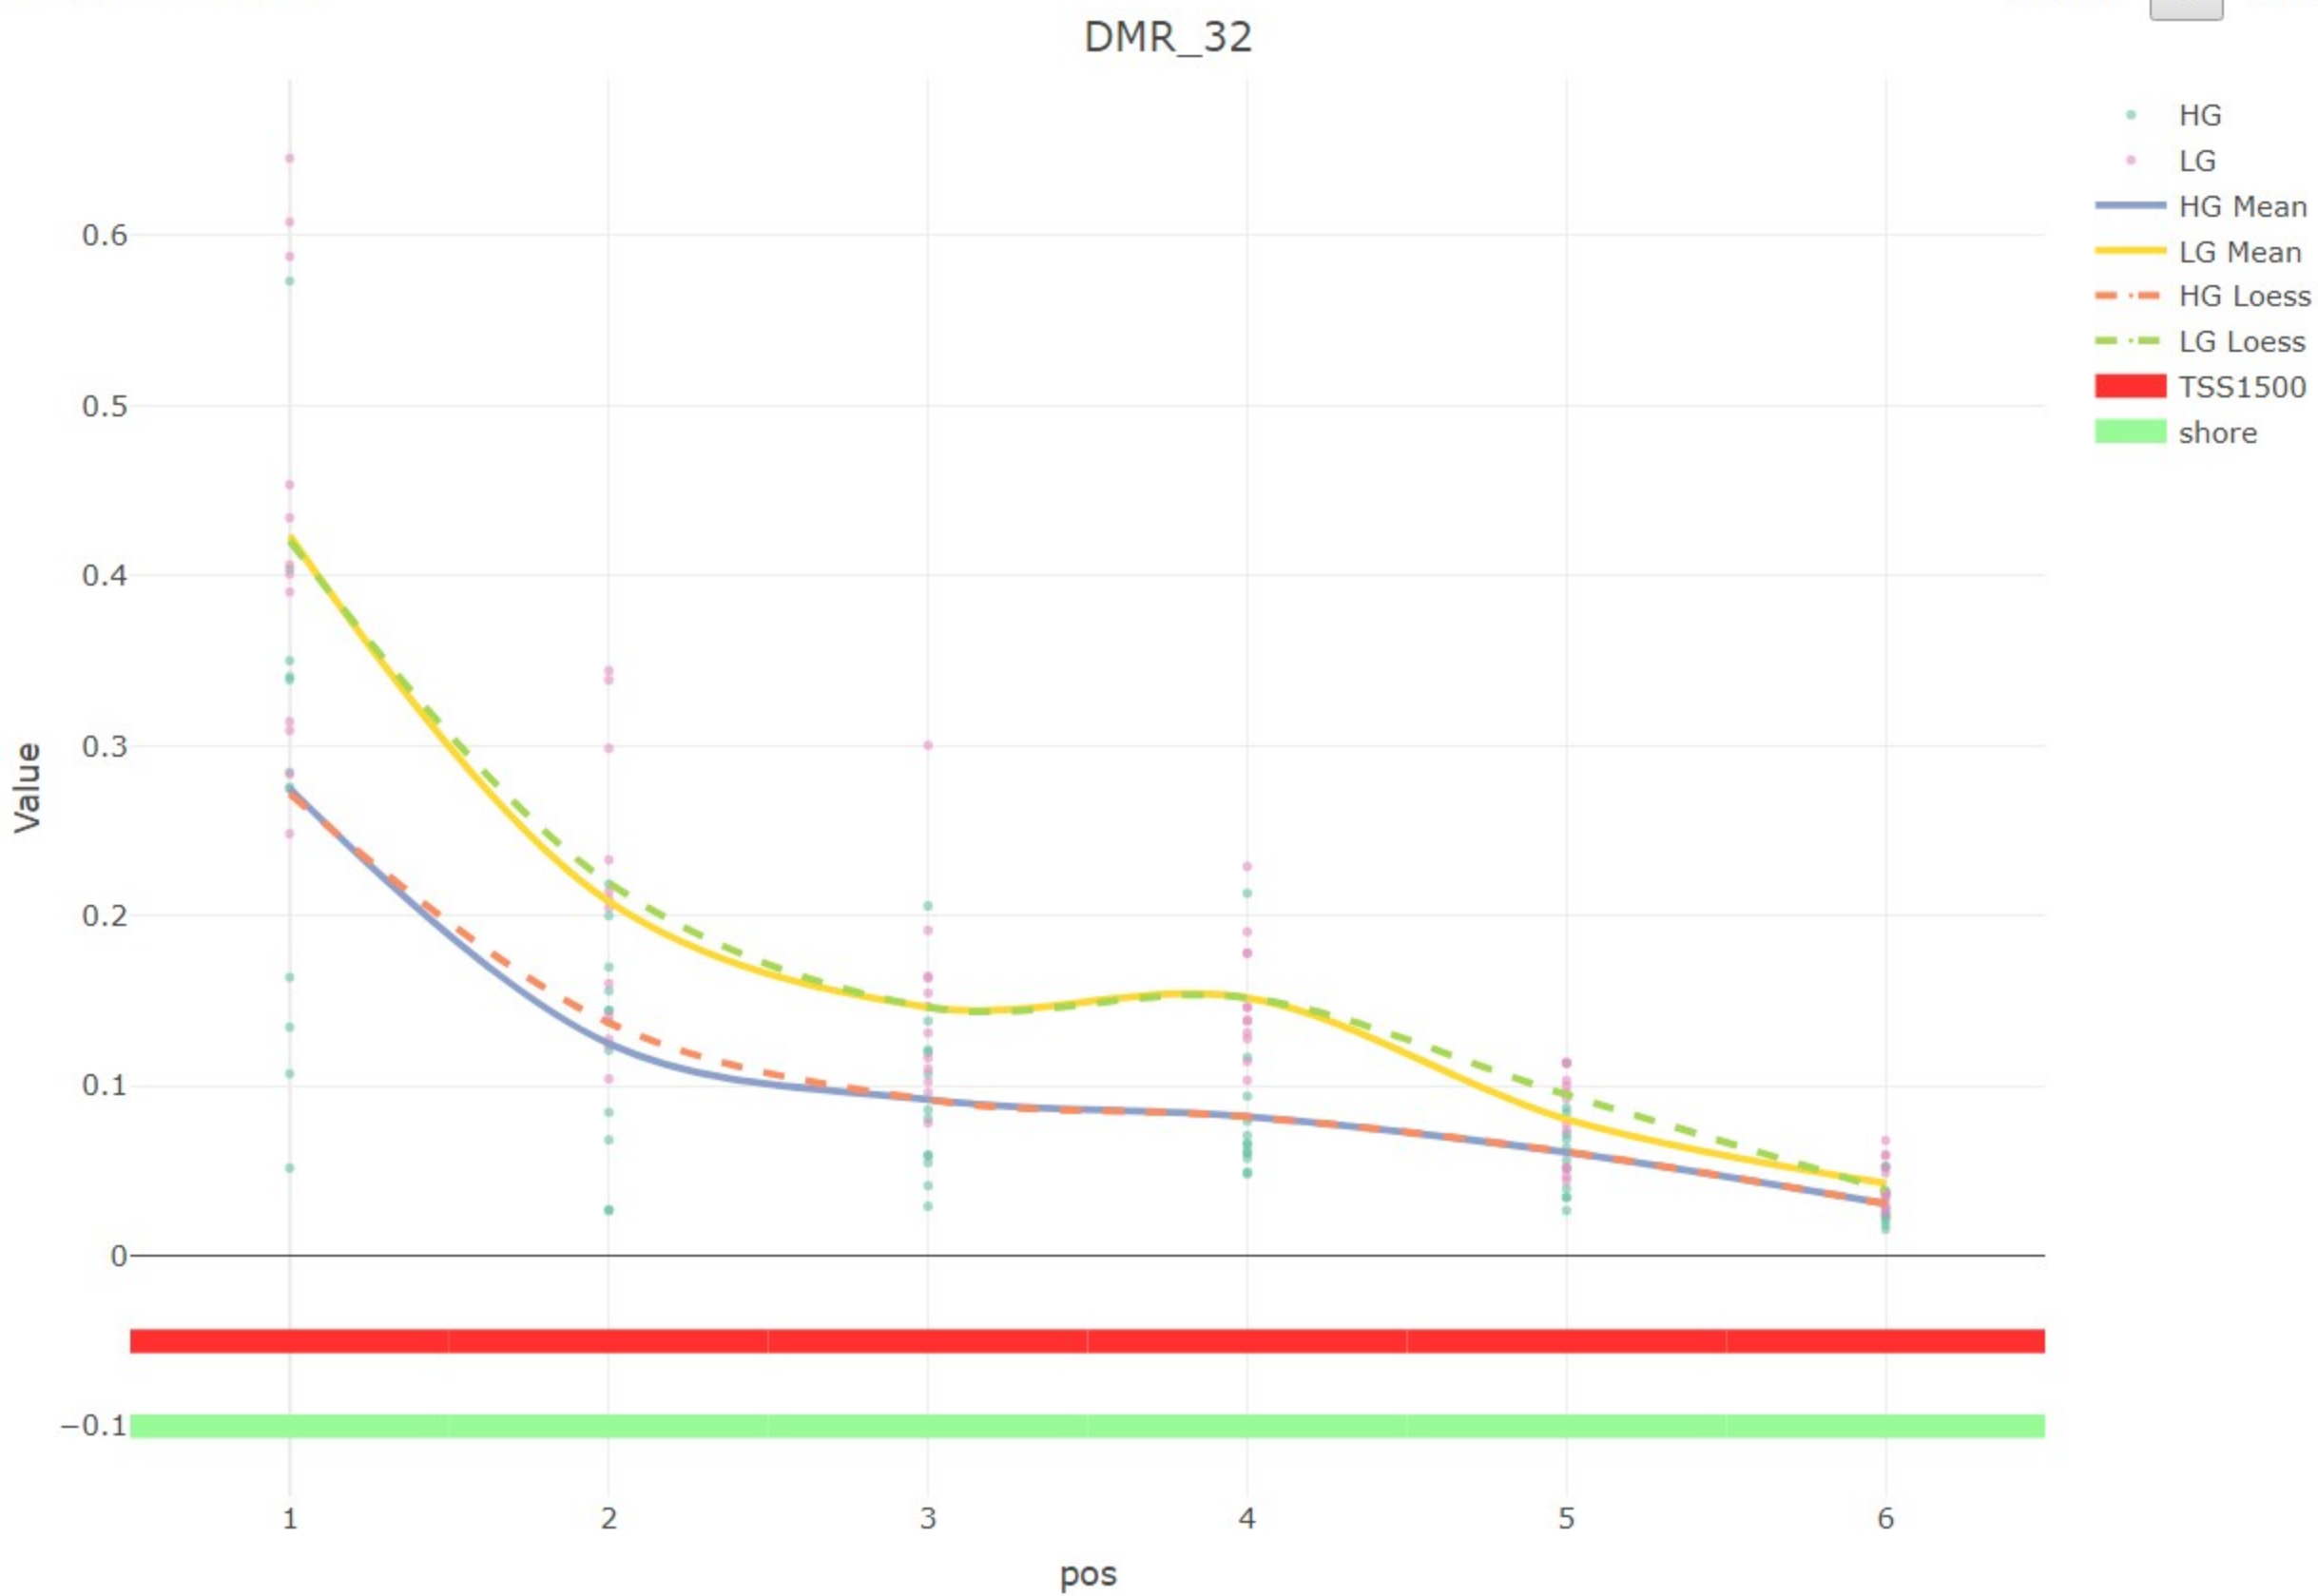

Show 25 entries

Search: 

|            | ID         | DMRindex | CHR | MAPINFO  | Strand | Type | gene  | feature | cgi    | feat.cgi       |
|------------|------------|----------|-----|----------|--------|------|-------|---------|--------|----------------|
| cg04904318 | cg04904318 | DMR_10   | 17  | 46607828 | R      | I    | HOXB1 | 1stExon | island | 1stExon-island |
| cg07823492 | cg07823492 | DMR_10   | 17  | 46608099 | R      | I    | HOXB1 | 1stExon | island | 1stExon-island |
| cg24948406 | cg24948406 | DMR_10   | 17  | 46608268 | R      | II   | HOXB1 | 5'UTR   | island | 5'UTR-island   |
| cg26634219 | cg26634219 | DMR_10   | 17  | 46608277 | R      | II   | HOXB1 | TSS200  | island | TSS200-island  |
| cg05726756 | cg05726756 | DMR_10   | 17  | 46608288 | R      | II   | HOXB1 | TSS200  | island | TSS200-island  |
| cg17233506 | cg17233506 | DMR_10   | 17  | 46608293 | R      | II   | HOXB1 | TSS200  | island | TSS200-island  |
| cg26687072 | cg26687072 | DMR_10   | 17  | 46608345 | R      | II   | HOXB1 | TSS200  | island | TSS200-island  |
| cg22660933 | cg22660933 | DMR_10   | 17  | 46608355 | F      | I    | HOXB1 | TSS200  | island | TSS200-island  |
| cg08076955 | cg08076955 | DMR_10   | 17  | 46608462 | F      | II   | HOXB1 | TSS200  | shore  | TSS200-shore   |
| cg18642924 | cg18642924 | DMR_10   | 17  | 46608486 | R      | II   | HOXB1 | TSS1500 | shore  | TSS1500-shore  |
| cg13752649 | cg13752649 | DMR_10   | 17  | 46608559 | R      | II   | HOXB1 | TSS1500 | shore  | TSS1500-shore  |
| cg02497558 | cg02497558 | DMR_10   | 17  | 46608570 | R      | I    | HOXB1 | TSS1500 | shore  | TSS1500-shore  |

Showing 1 to 12 of 12 entries

Previous

1

Next

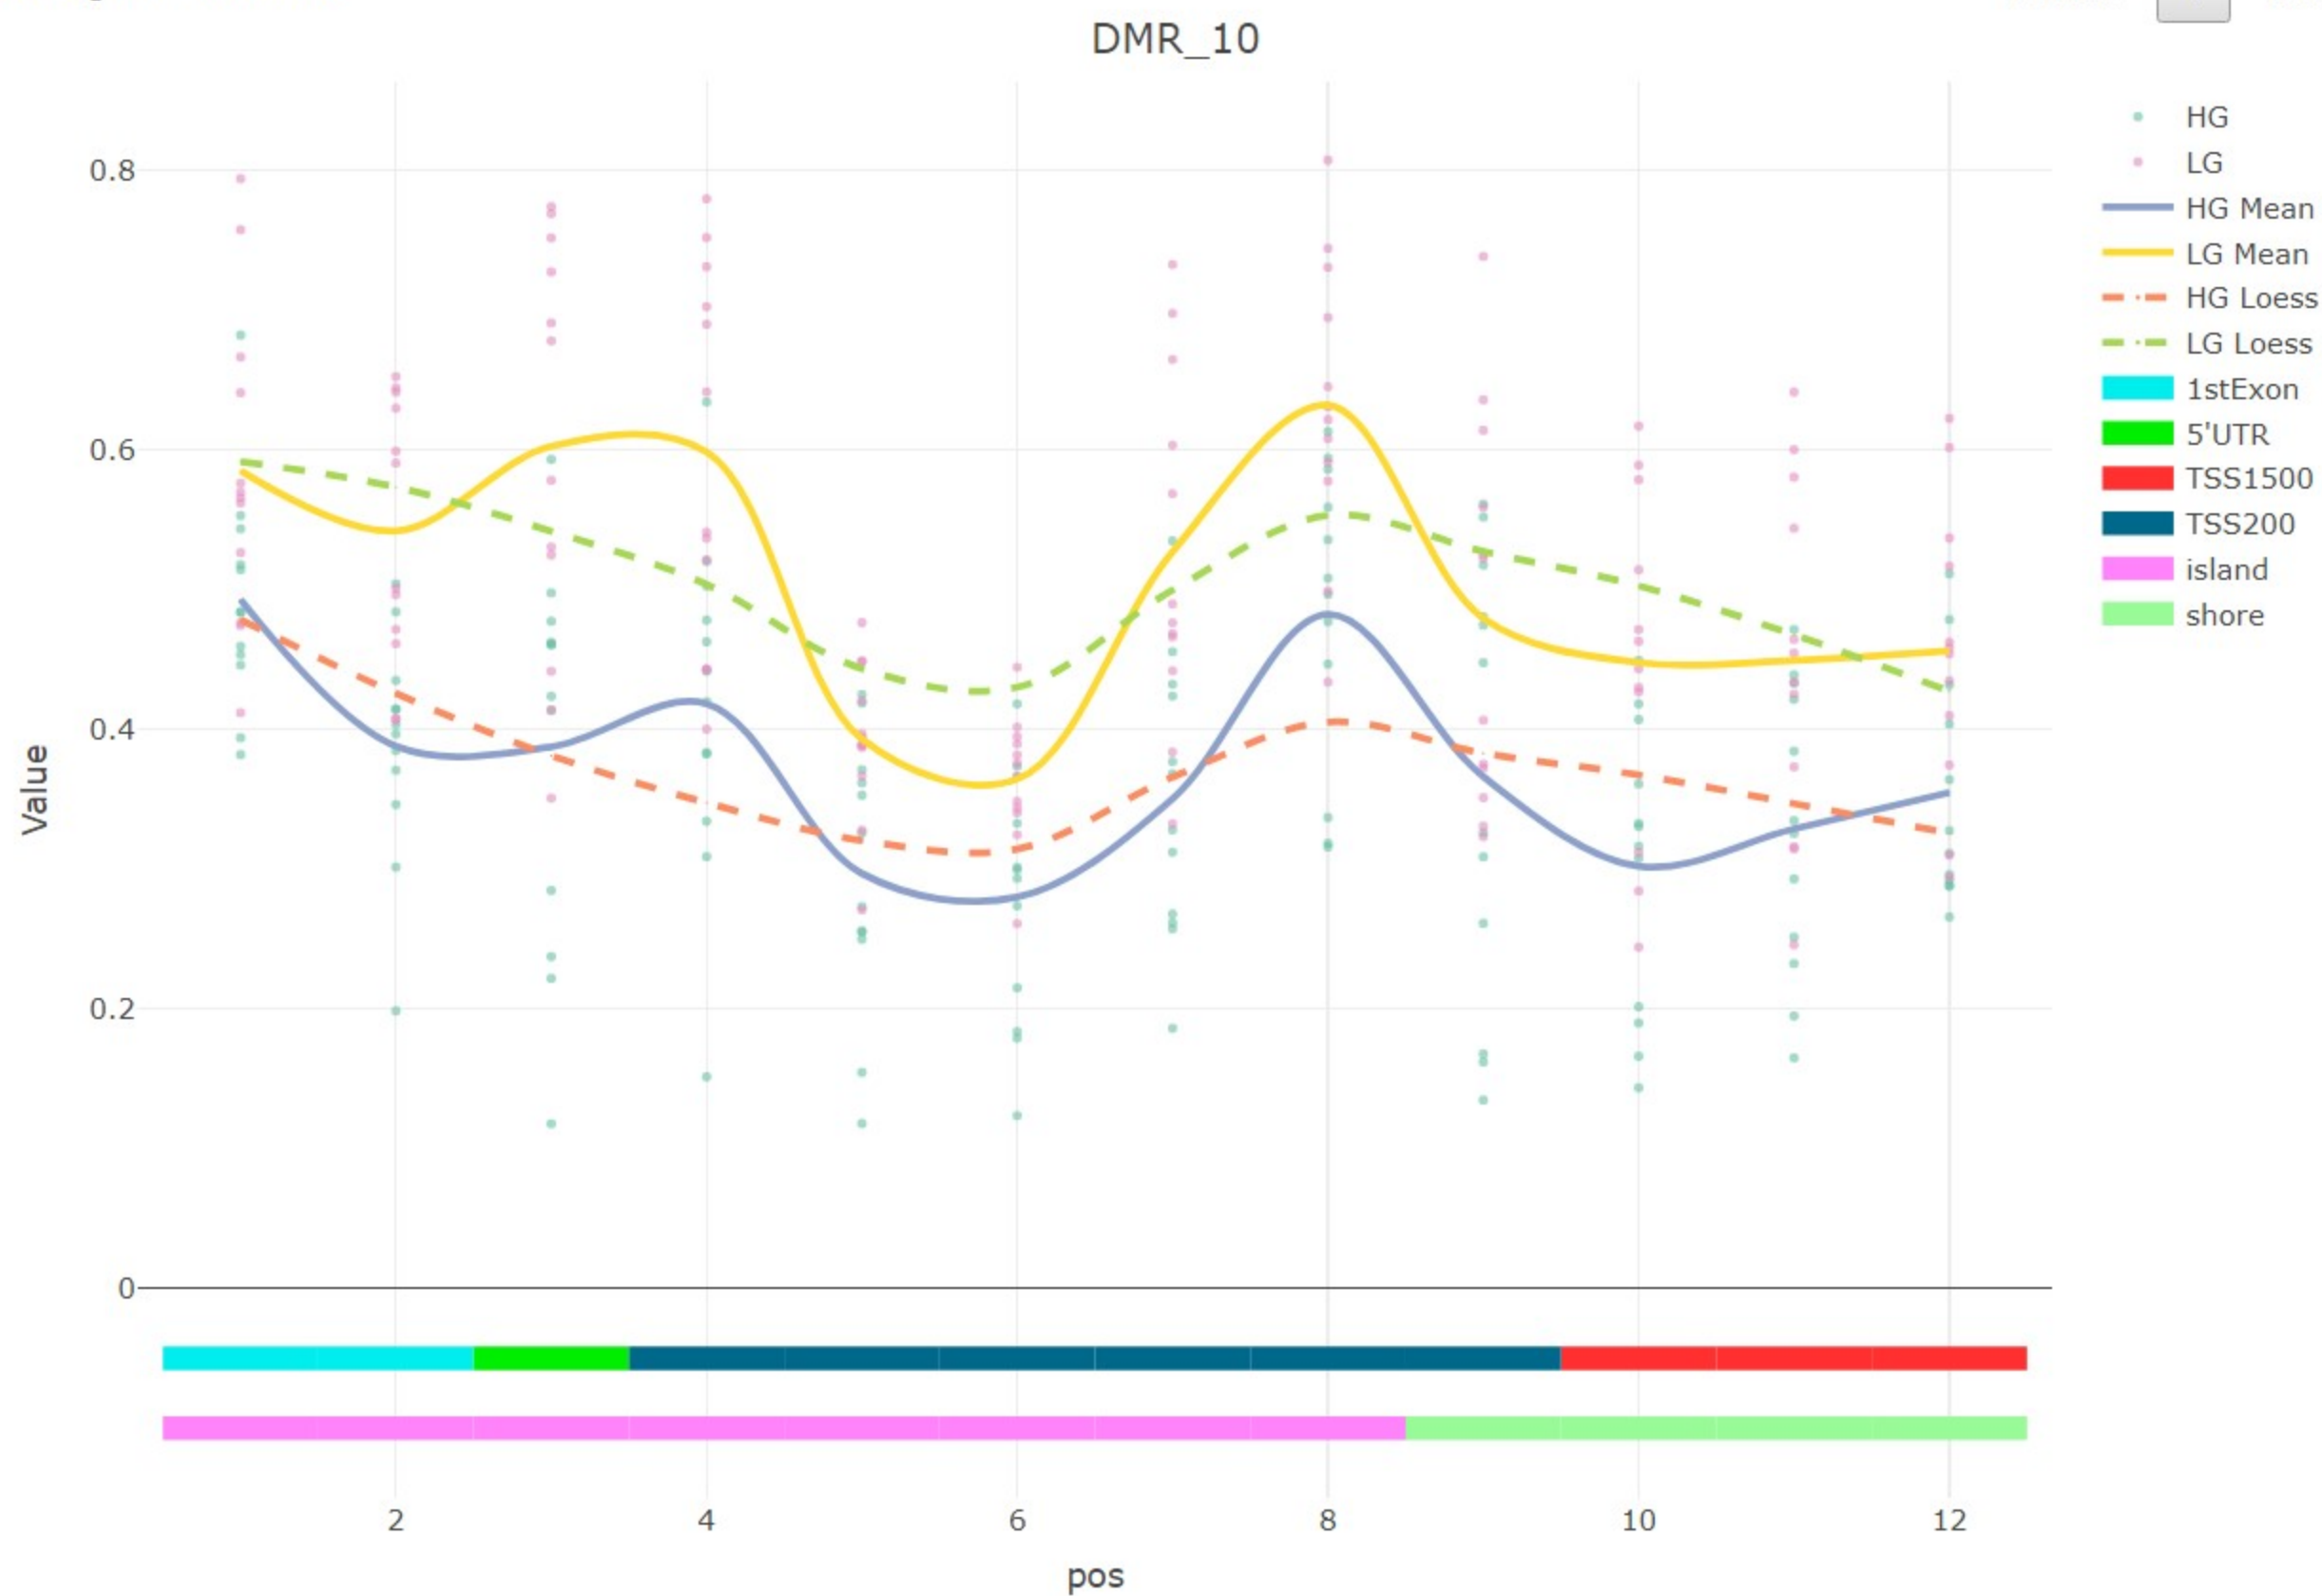

Show 8 entries

Search: 

| ID         | DMRindex   | CHR    | MAPINFO | Strand   | Type | gene | feature | cgi     | feat.cgi |                 |
|------------|------------|--------|---------|----------|------|------|---------|---------|----------|-----------------|
| cg12490395 | cg12490395 | DMR_31 | 12      | 16760894 | F    | II   | LMO3    | 1stExon | opensea  | 1stExon-opensea |
| cg22959054 | cg22959054 | DMR_31 | 12      | 16761114 | F    | II   | LMO3    | TSS200  | opensea  | TSS200-opensea  |
| cg16930572 | cg16930572 | DMR_31 | 12      | 16761118 | F    | II   | LMO3    | TSS200  | opensea  | TSS200-opensea  |
| cg03745994 | cg03745994 | DMR_31 | 12      | 16761299 | F    | II   | LMO3    | TSS200  | opensea  | TSS200-opensea  |
| cg11511443 | cg11511443 | DMR_31 | 12      | 16761406 | F    | II   | LMO3    | TSS1500 | opensea  | TSS1500-opensea |
| cg26044490 | cg26044490 | DMR_31 | 12      | 16761419 | R    | II   | LMO3    | TSS1500 | opensea  | TSS1500-opensea |
| cg00606190 | cg00606190 | DMR_31 | 12      | 16761702 | F    | II   | LMO3    | TSS1500 | opensea  | TSS1500-opensea |
| cg10800369 | cg10800369 | DMR_31 | 12      | 16761930 | R    | II   | LMO3    | TSS1500 | opensea  | TSS1500-opensea |

Showing 1 to 8 of 8 entries

Previous 1 Next

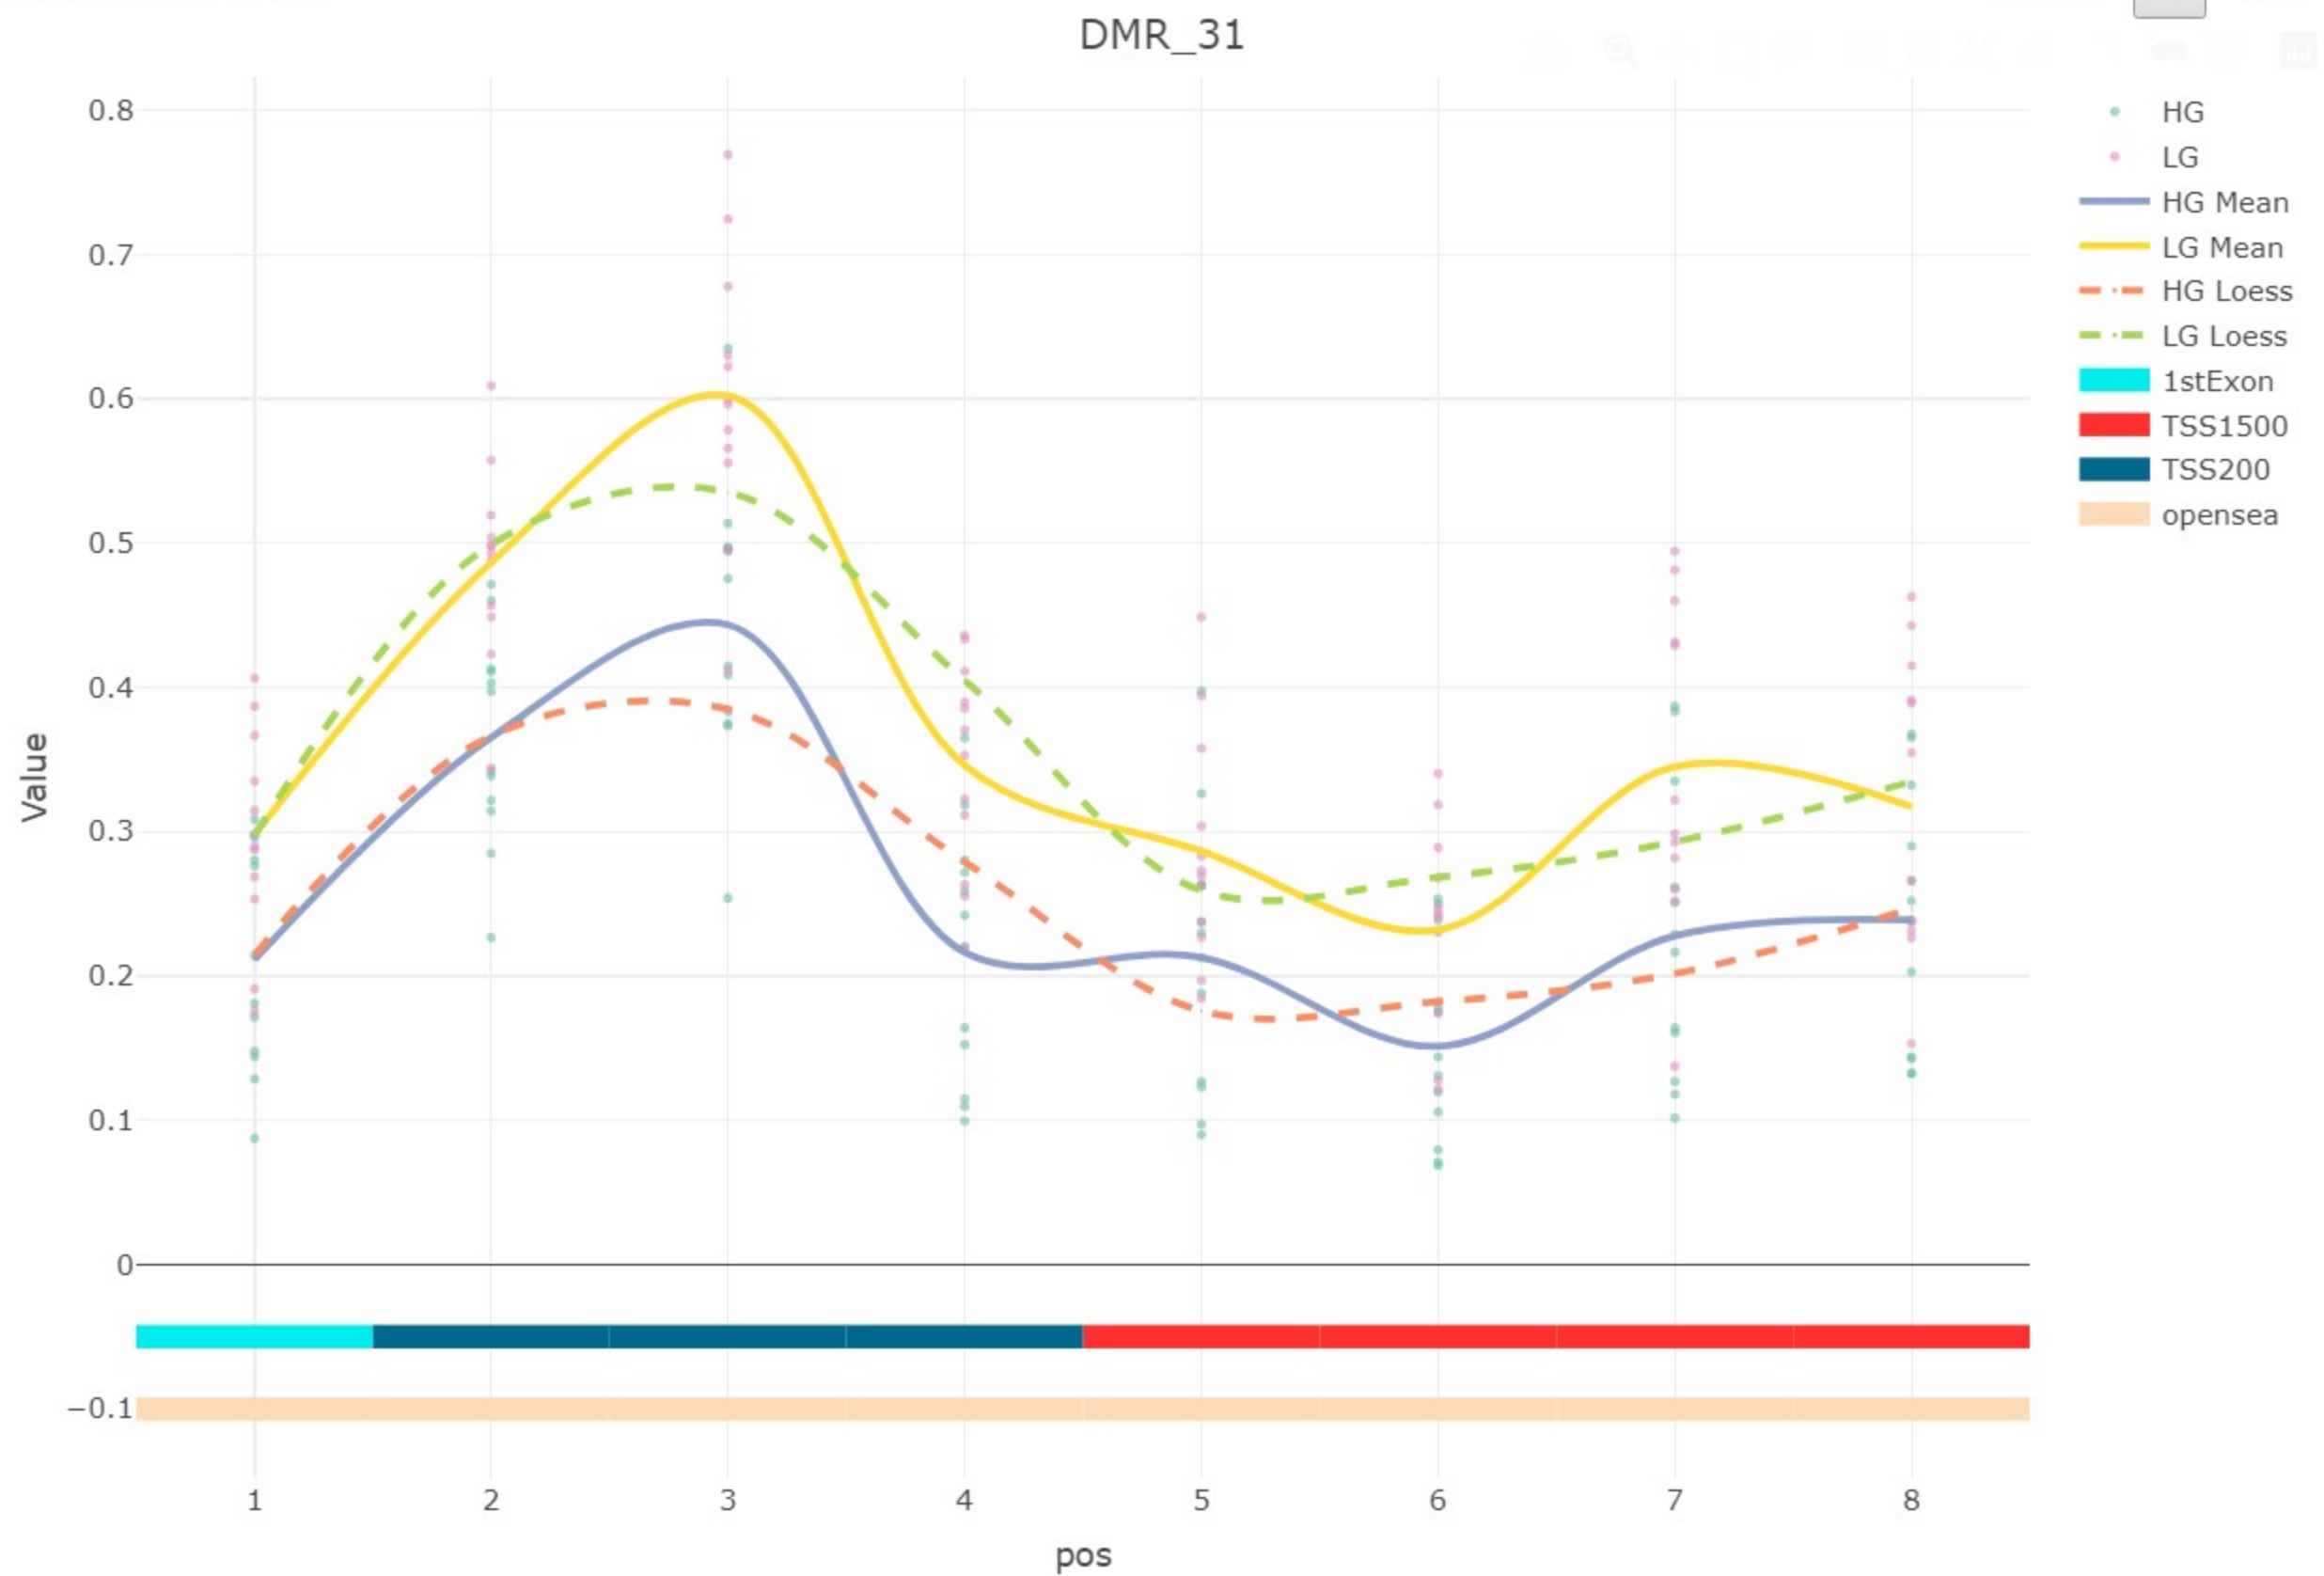

Show 25 entries

Search:

| ID         | DMRindex   | CHR   | MAPINFO | Strand    | Type | gene | feature | cgi     | feat.cgi |                 |
|------------|------------|-------|---------|-----------|------|------|---------|---------|----------|-----------------|
| cg16577593 | cg16577593 | DMR_3 | 5       | 138210550 | F    | II   | LRRTM2  | Body    | opensea  | Body-opensea    |
| cg16822914 | cg16822914 | DMR_3 | 5       | 138210632 | R    | II   | CTNNA1  | TSS1500 | opensea  | TSS1500-opensea |
| cg17865528 | cg17865528 | DMR_3 | 5       | 138210634 | F    | II   | CTNNA1  | TSS1500 | opensea  | TSS1500-opensea |
| cg14902598 | cg14902598 | DMR_3 | 5       | 138210650 | F    | II   | CTNNA1  | TSS1500 | opensea  | TSS1500-opensea |
| cg20515447 | cg20515447 | DMR_3 | 5       | 138210749 | R    | II   | LRRTM2  | 1stExon | opensea  | 1stExon-opensea |
| cg06605984 | cg06605984 | DMR_3 | 5       | 138210906 | R    | II   | LRRTM2  | 1stExon | opensea  | 1stExon-opensea |
| cg16777413 | cg16777413 | DMR_3 | 5       | 138211013 | F    | II   | LRRTM2  | 1stExon | opensea  | 1stExon-opensea |
| cg11677683 | cg11677683 | DMR_3 | 5       | 138211043 | F    | II   | CTNNA1  | Body    | opensea  | Body-opensea    |
| cg23184518 | cg23184518 | DMR_3 | 5       | 138211071 | F    | II   | CTNNA1  | Body    | opensea  | Body-opensea    |
| cg08771171 | cg08771171 | DMR_3 | 5       | 138211084 | F    | II   | CTNNA1  | Body    | opensea  | Body-opensea    |
| cg06606949 | cg06606949 | DMR_3 | 5       | 138211149 | R    | II   | CTNNA1  | Body    | opensea  | Body-opensea    |
| cg17315014 | cg17315014 | DMR_3 | 5       | 138211155 | F    | II   | CTNNA1  | Body    | opensea  | Body-opensea    |
| cg01156295 | cg01156295 | DMR_3 | 5       | 138211184 | R    | II   | CTNNA1  | Body    | opensea  | Body-opensea    |

Showing 1 to 13 of 13 entries

Previous

1

Next

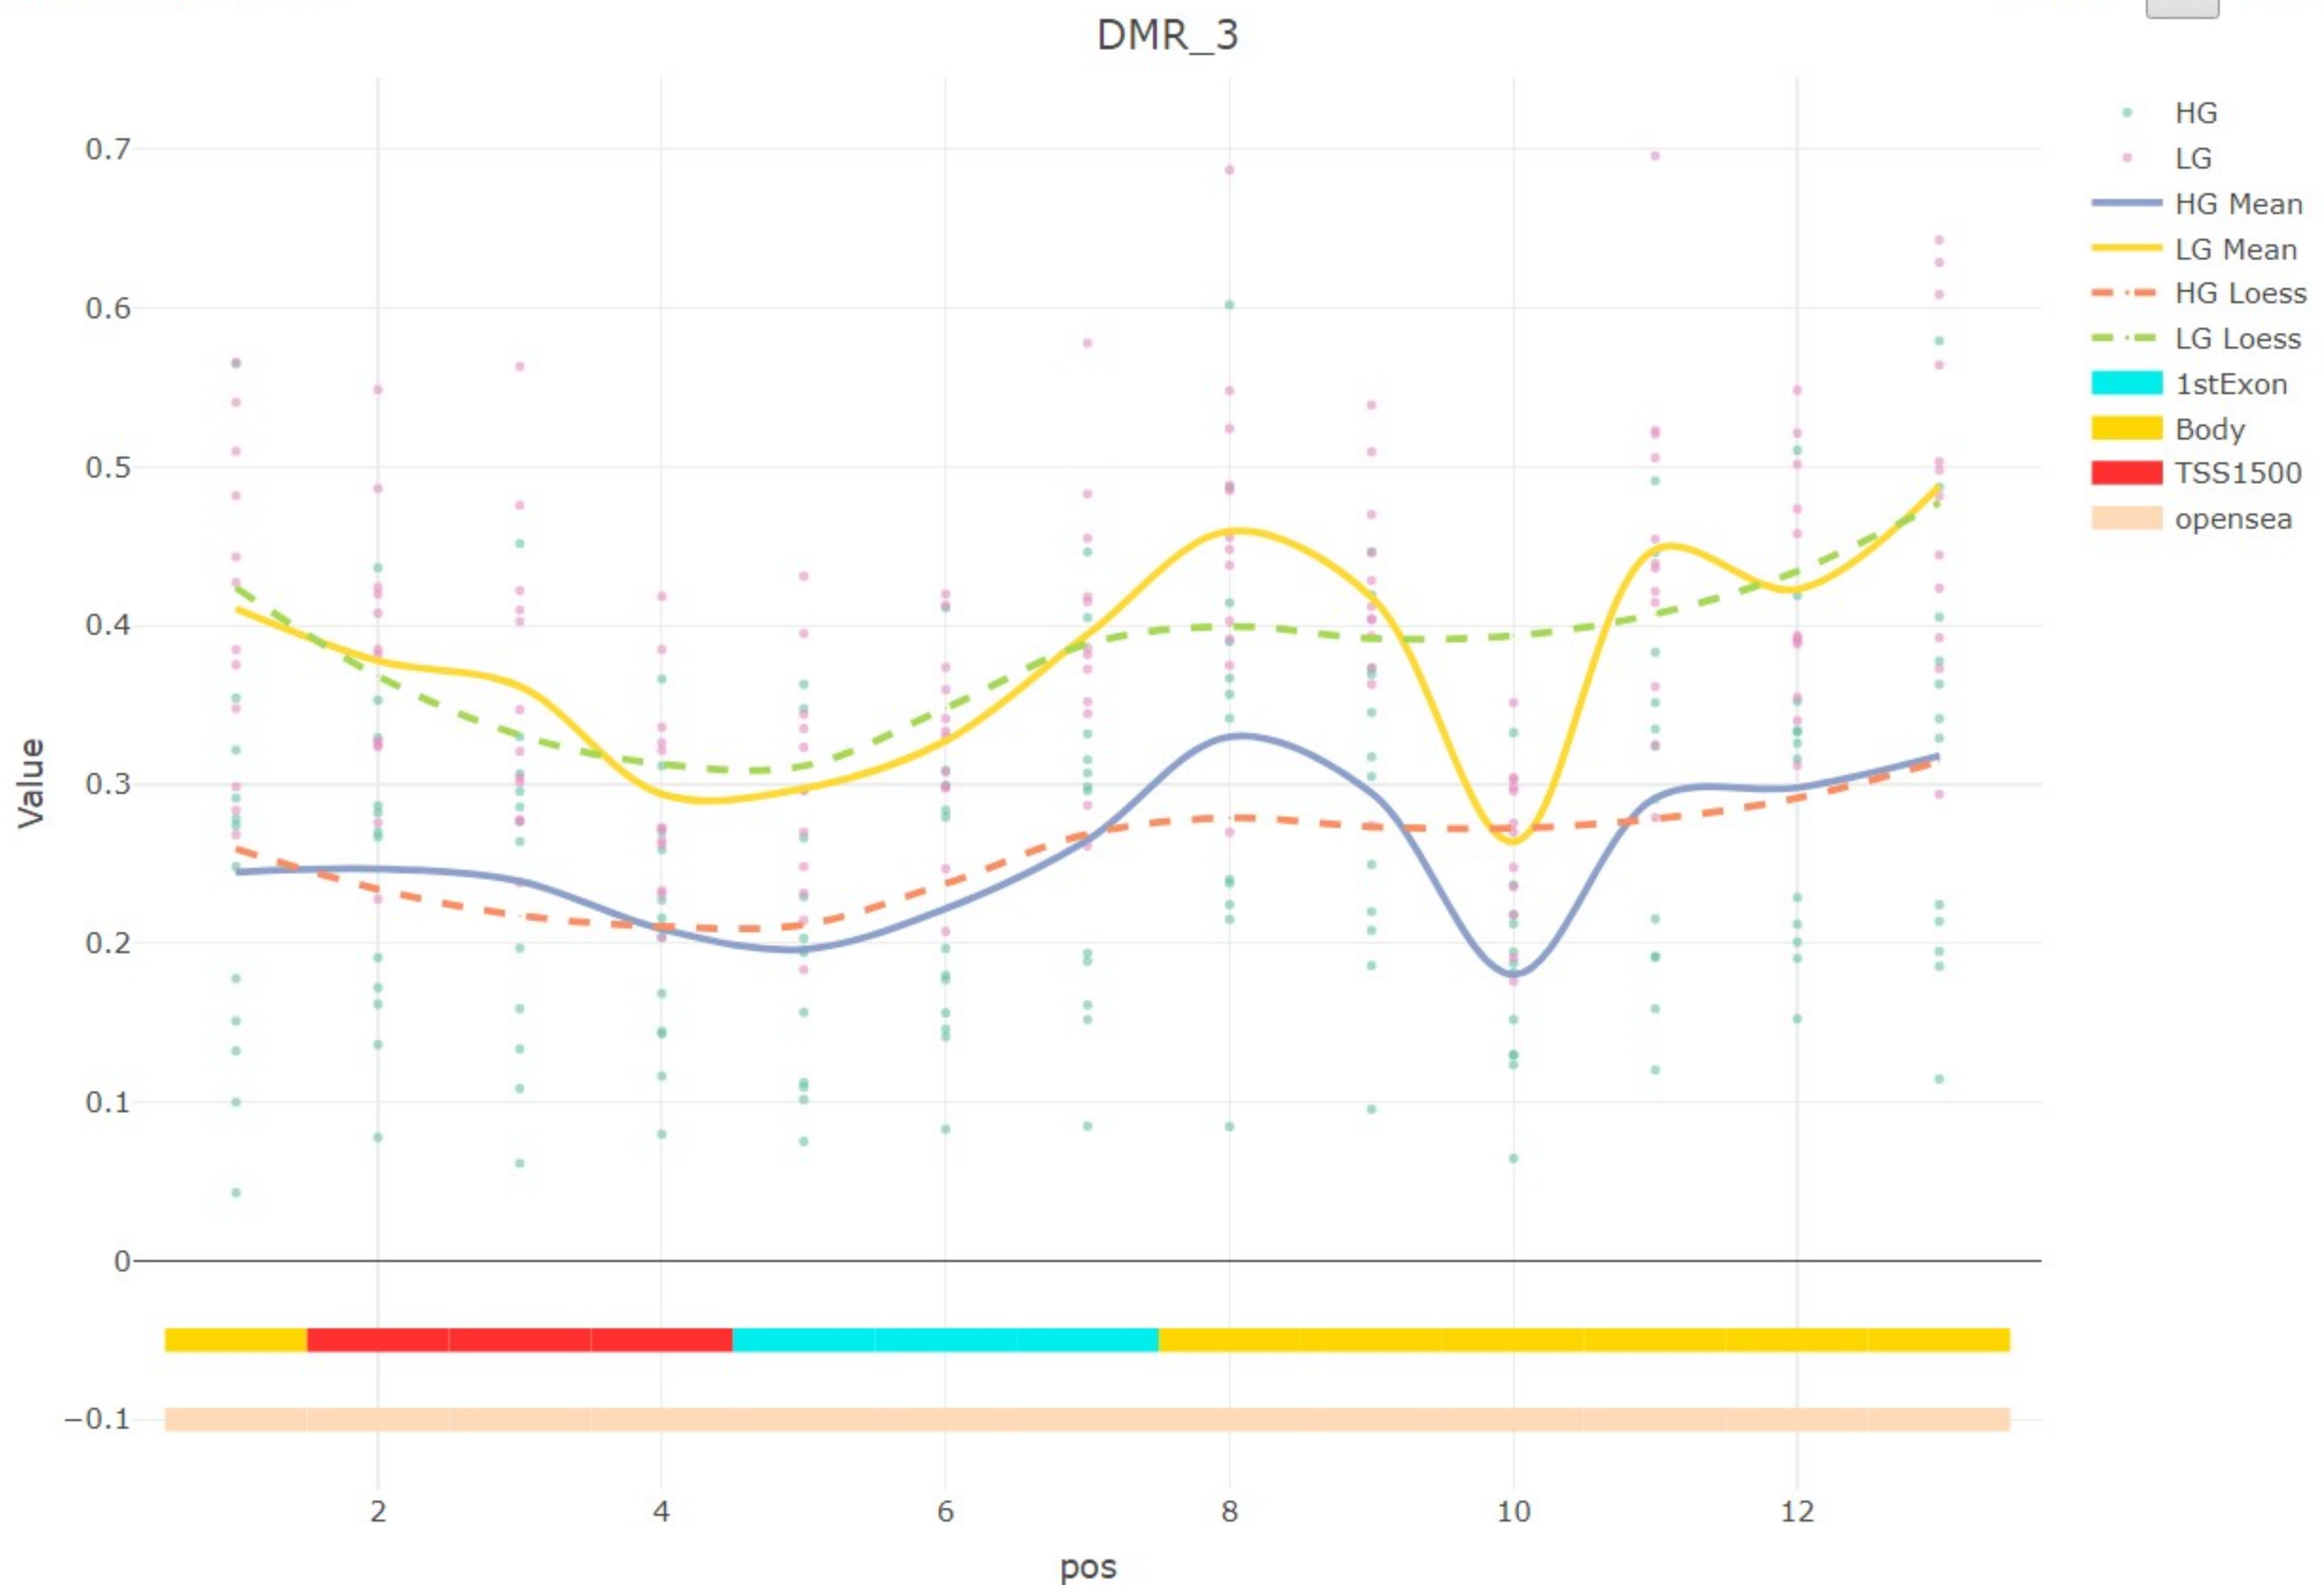



Show **8** entriesSearch: 

| ID         | DMRindex   | CHR    | MAPINFO | Strand   | Type | gene | feature | cgi     | feat.cgi |                 |
|------------|------------|--------|---------|----------|------|------|---------|---------|----------|-----------------|
| cg06123376 | cg06123376 | DMR_52 | 5       | 66254316 | R    | II   | MAST4   | TSS1500 | opensea  | TSS1500-opensea |
| cg08274405 | cg08274405 | DMR_52 | 5       | 66254395 | R    | II   | MAST4   | TSS1500 | opensea  | TSS1500-opensea |
| cg24464915 | cg24464915 | DMR_52 | 5       | 66254431 | R    | II   | MAST4   | TSS1500 | opensea  | TSS1500-opensea |
| cg14455887 | cg14455887 | DMR_52 | 5       | 66254474 | R    | II   | MAST4   | TSS1500 | opensea  | TSS1500-opensea |
| cg14105271 | cg14105271 | DMR_52 | 5       | 66254655 | F    | II   | MAST4   | TSS200  | opensea  | TSS200-opensea  |
| cg06040990 | cg06040990 | DMR_52 | 5       | 66254876 | R    | II   | MAST4   | 5'UTR   | opensea  | 5'UTR-opensea   |
| cg10012517 | cg10012517 | DMR_52 | 5       | 66255015 | R    | II   | MAST4   | 5'UTR   | opensea  | 5'UTR-opensea   |
| cg12264517 | cg12264517 | DMR_52 | 5       | 66255020 | R    | II   | MAST4   | 5'UTR   | opensea  | 5'UTR-opensea   |

Showing 1 to 8 of 8 entries

Previous **1** Next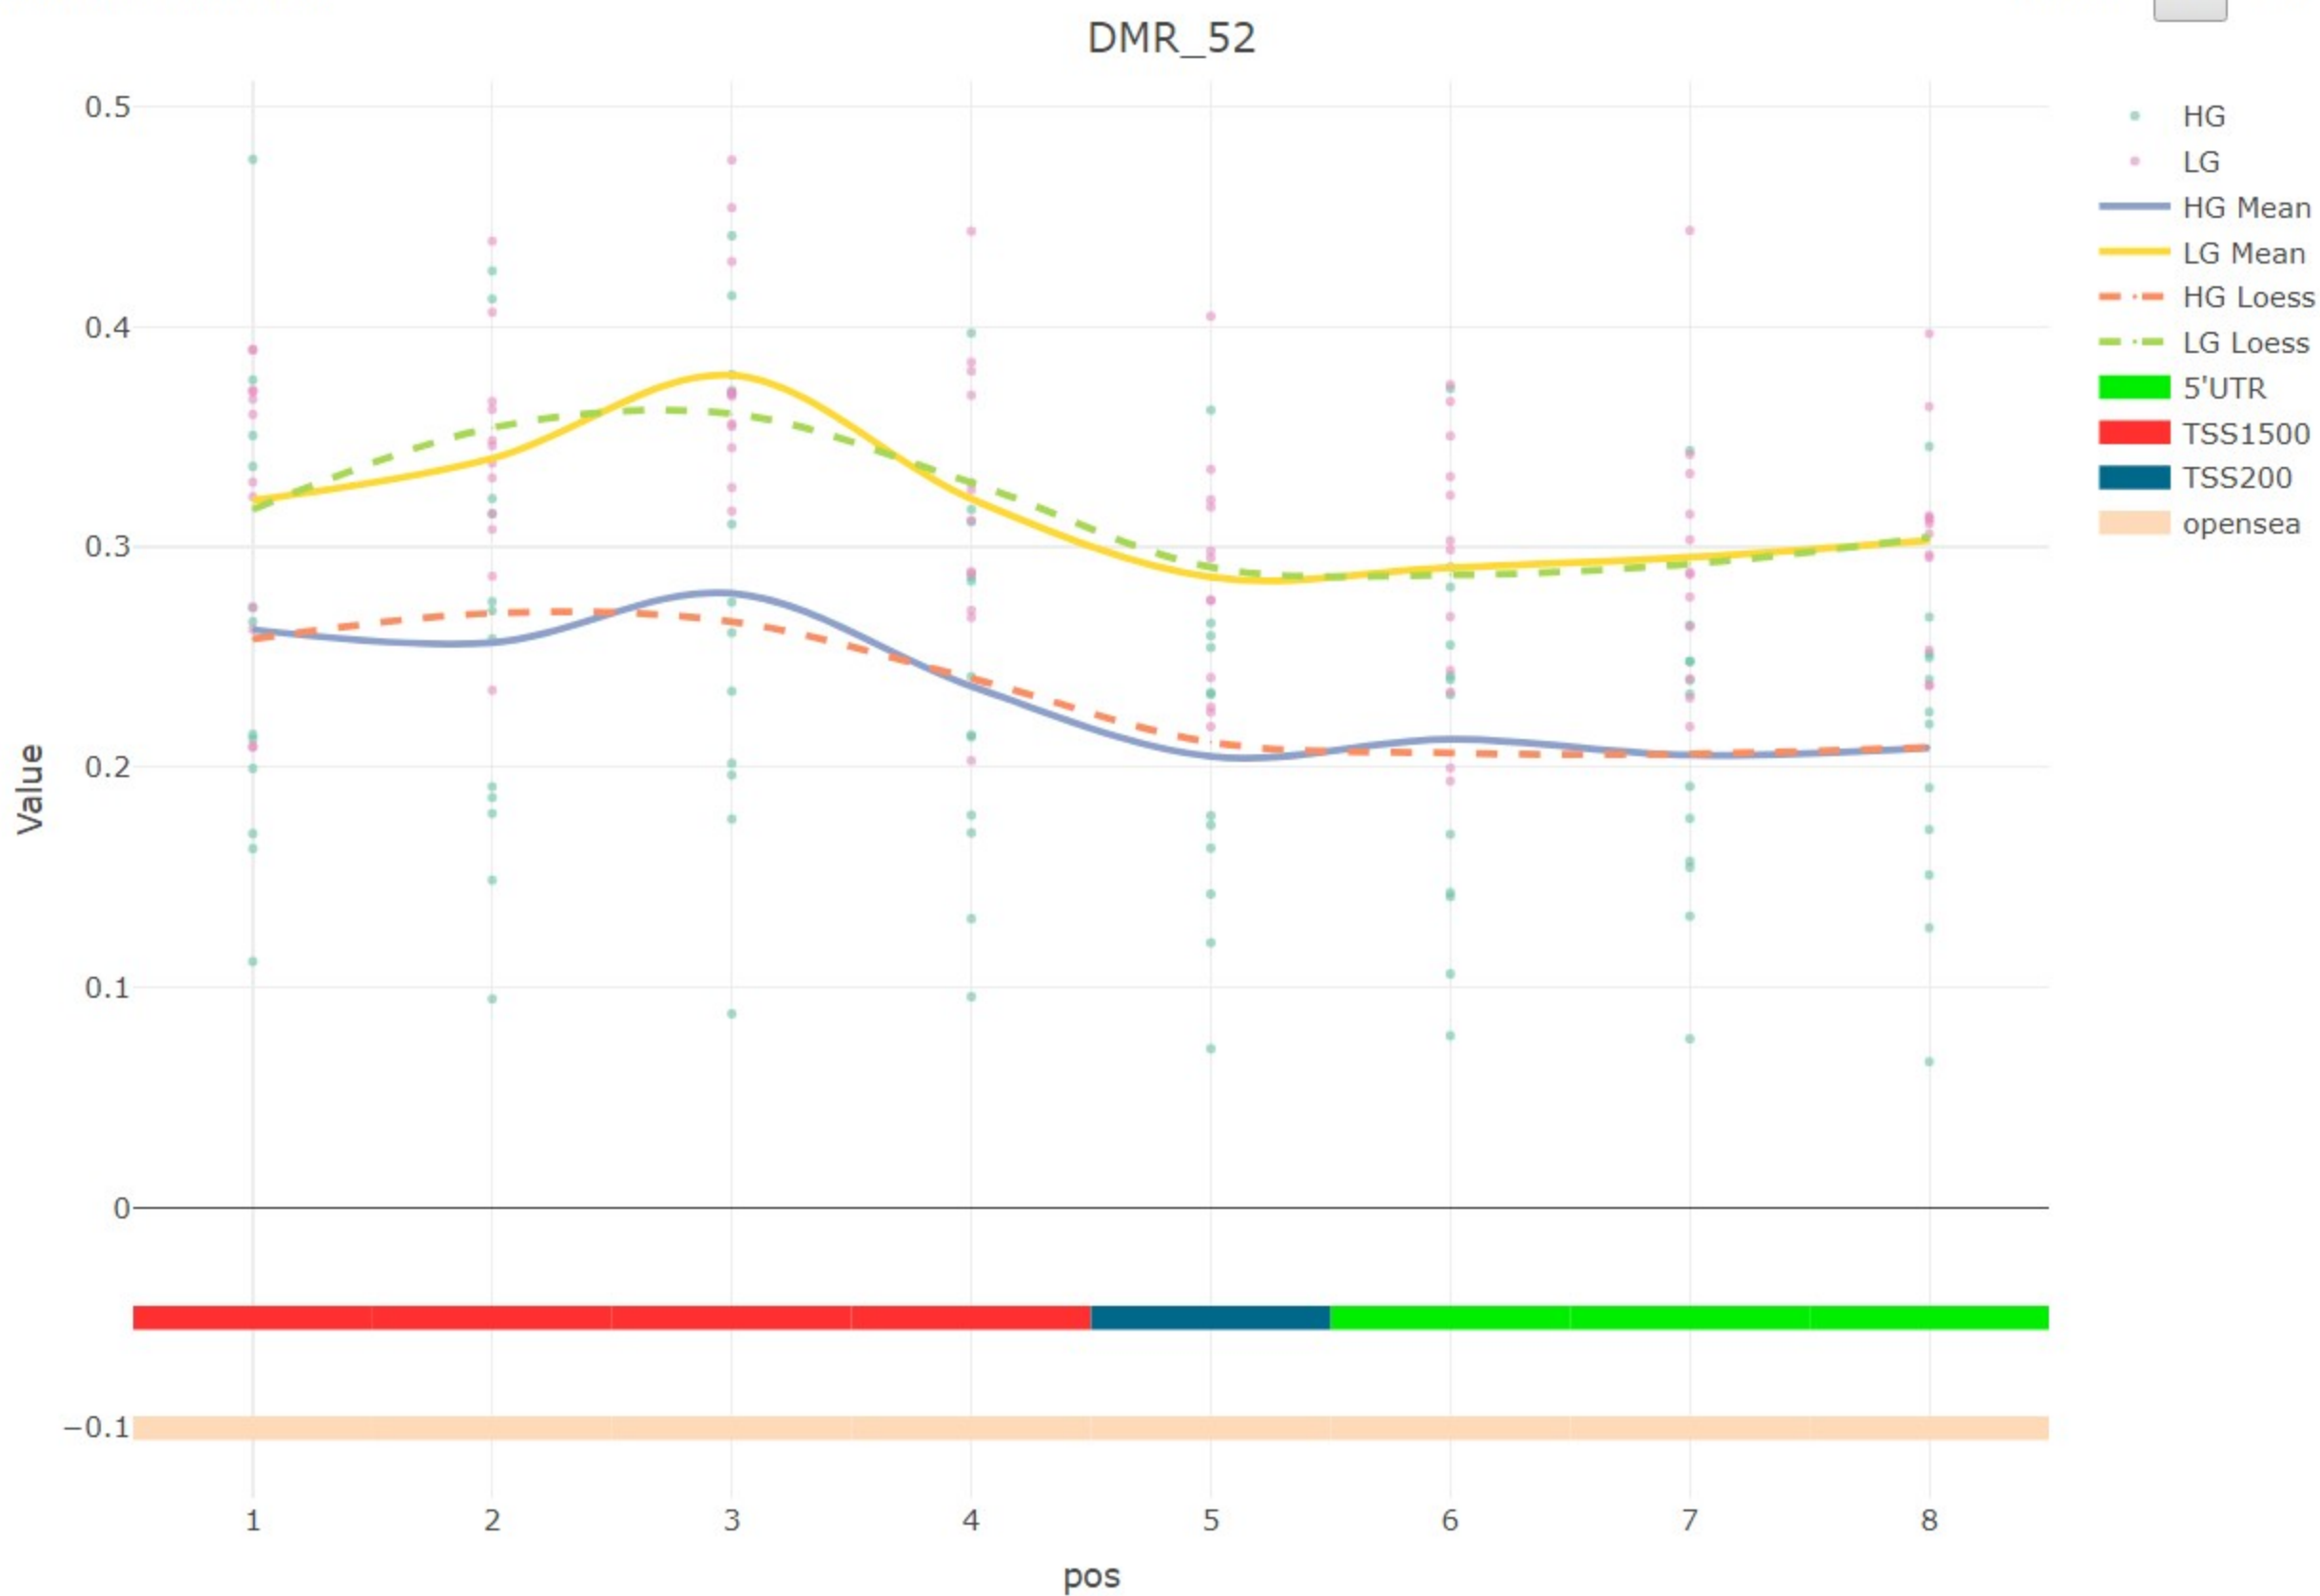

Show  entriesSearch: 

|            | ID         | DMRindex | CHR | MAPINFO   | Strand | Type | gene    | feature | cgi   | feat.cgi   |
|------------|------------|----------|-----|-----------|--------|------|---------|---------|-------|------------|
| cg17706086 | cg17706086 | DMR_46   | 7   | 130129946 | F      | II   | MESTIT1 | Body    | shore | Body-shore |
| cg10473158 | cg10473158 | DMR_46   | 7   | 130130122 | R      | II   | MESTIT1 | Body    | shore | Body-shore |
| cg05222671 | cg05222671 | DMR_46   | 7   | 130130155 | R      | II   | MESTIT1 | Body    | shore | Body-shore |
| cg10767216 | cg10767216 | DMR_46   | 7   | 130130187 | R      | II   | MESTIT1 | Body    | shore | Body-shore |
| cg17347253 | cg17347253 | DMR_46   | 7   | 130130288 | R      | II   | MESTIT1 | Body    | shore | Body-shore |
| cg02756856 | cg02756856 | DMR_46   | 7   | 130130320 | F      | II   | MESTIT1 | Body    | shore | Body-shore |
| cg26275543 | cg26275543 | DMR_46   | 7   | 130130383 | R      | II   | MESTIT1 | Body    | shore | Body-shore |

Showing 1 to 7 of 7 entries

Previous  Next

## DMR\_46

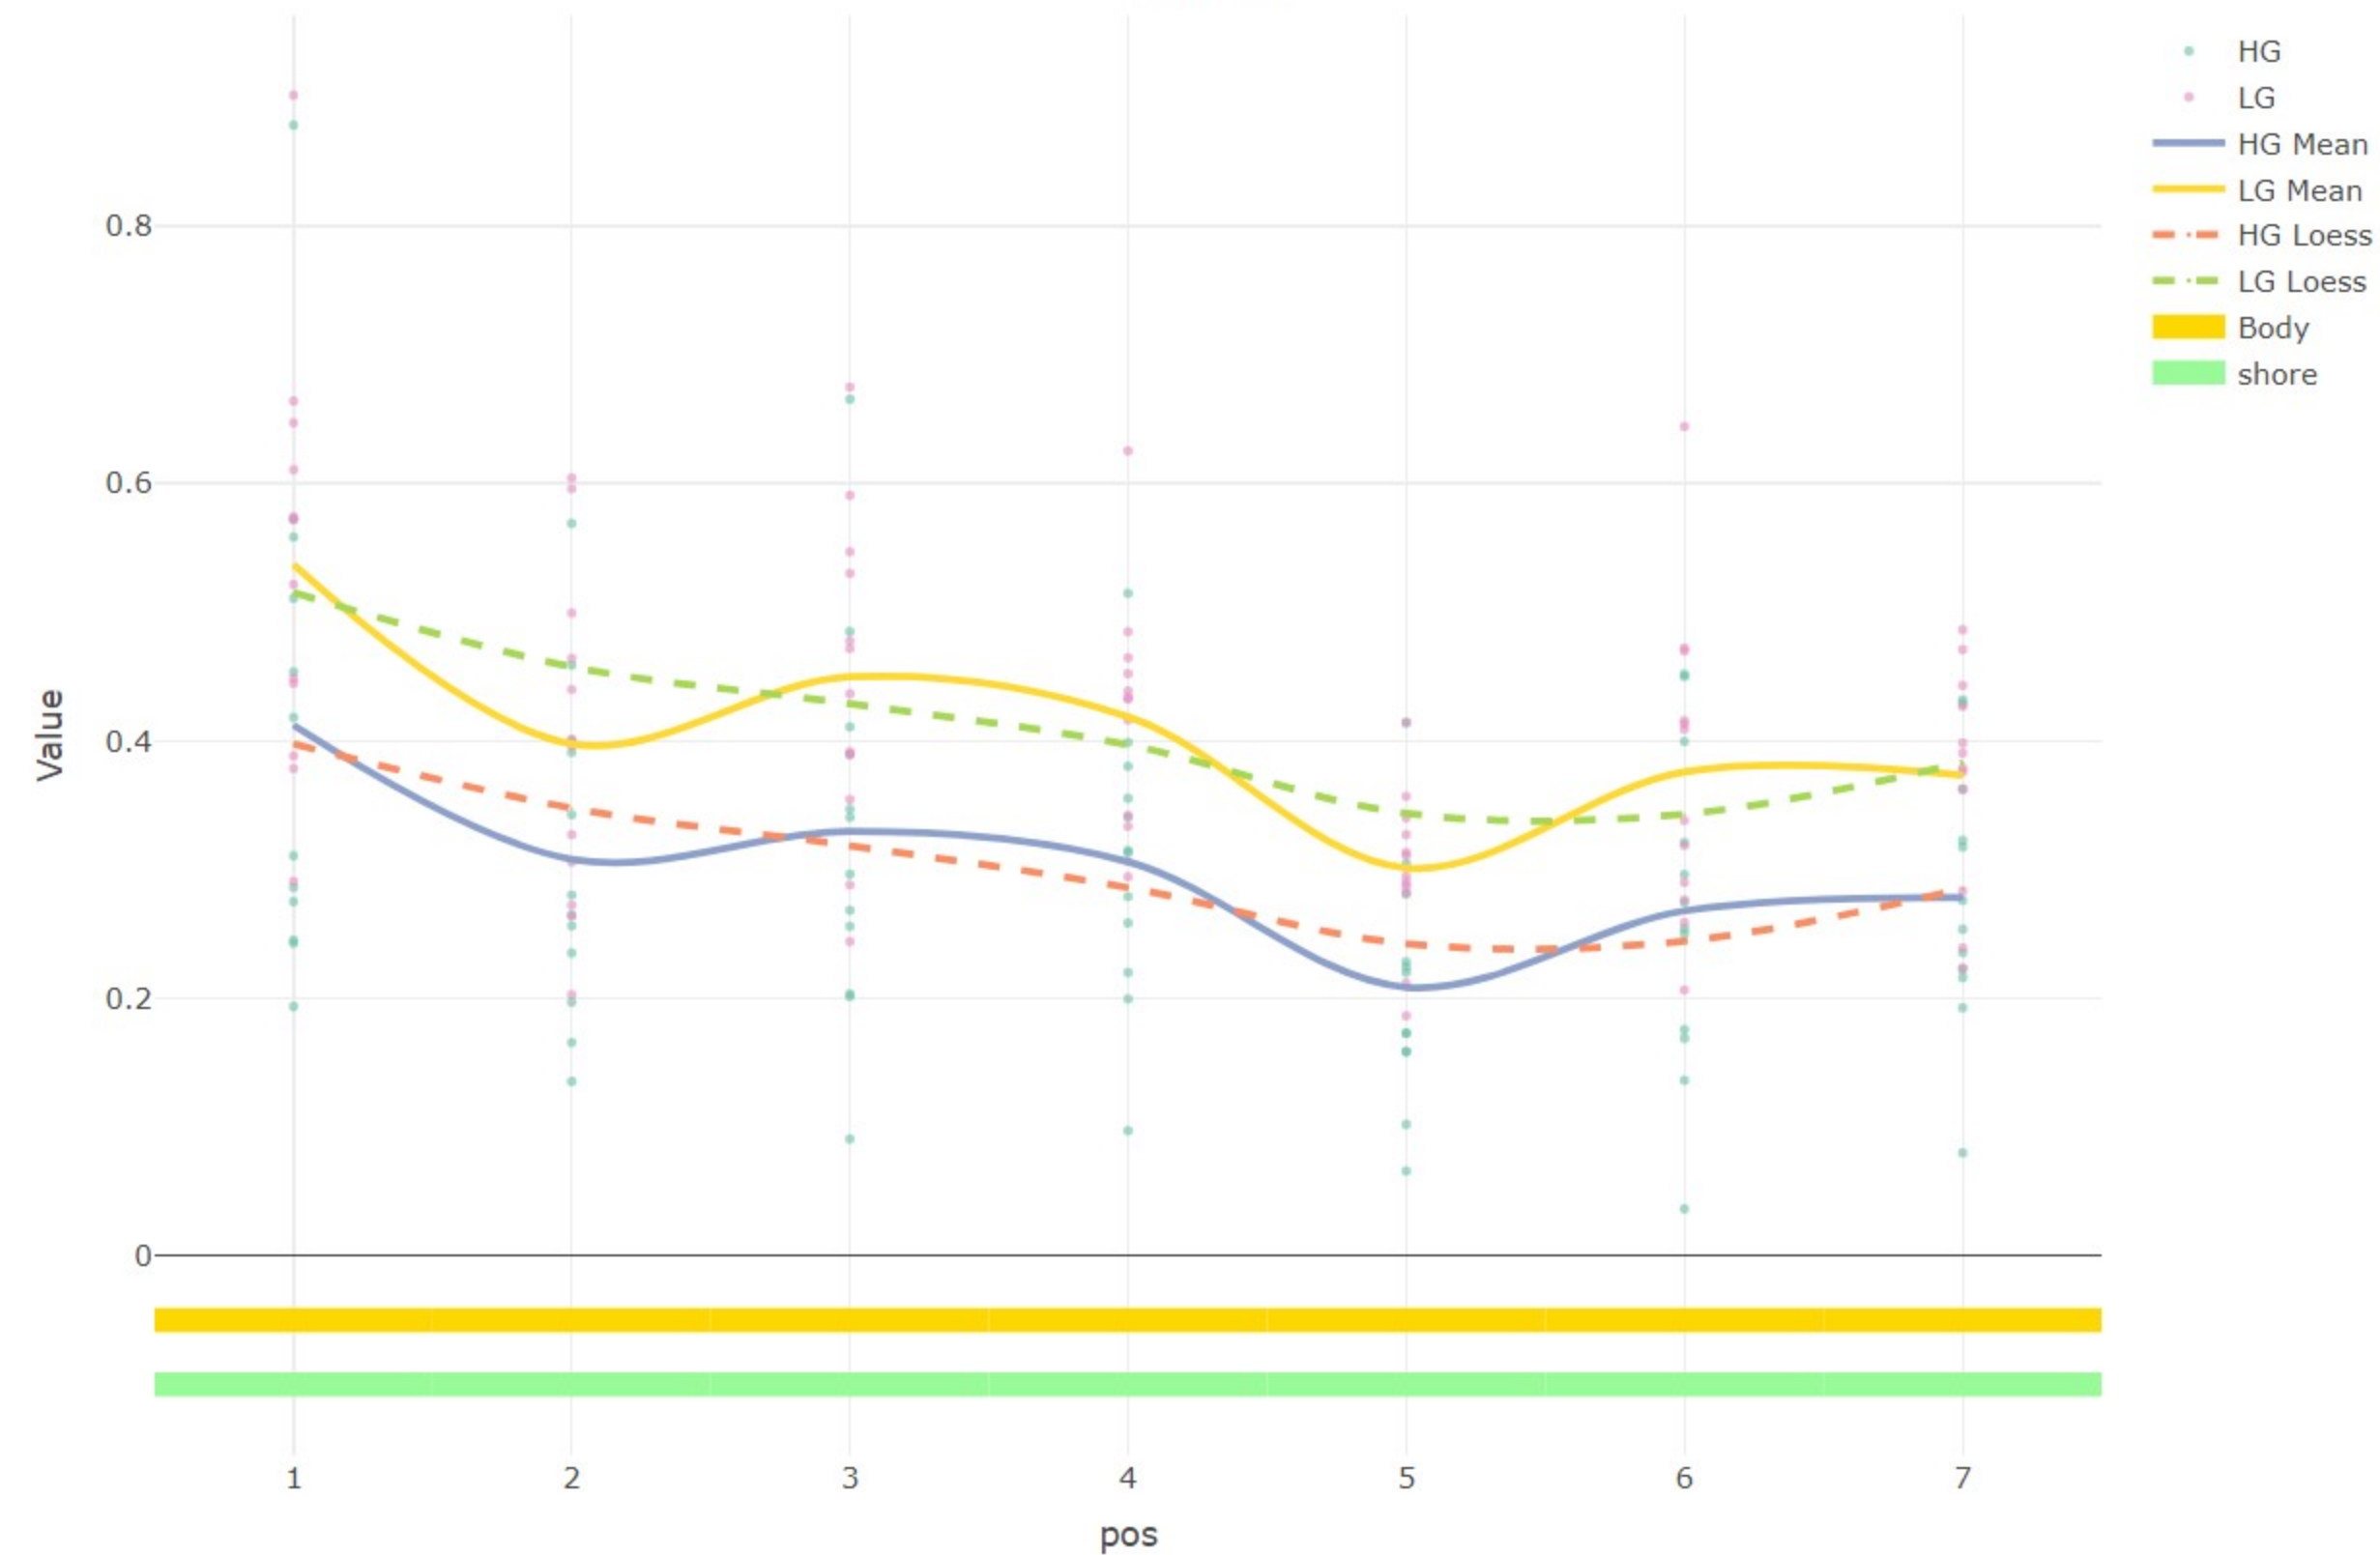

Show **8** entriesSearch: 

| ID         | DMRindex   | CHR    | MAPINFO | Strand   | Type | gene | feature | cgi    | feat.cgi |                |
|------------|------------|--------|---------|----------|------|------|---------|--------|----------|----------------|
| cg21367256 | cg21367256 | DMR_33 | 20      | 62795658 | F    | II   | MYT1    | TSS200 | opensea  | TSS200-opensea |
| cg12828073 | cg12828073 | DMR_33 | 20      | 62795688 | R    | II   | MYT1    | TSS200 | opensea  | TSS200-opensea |
| cg16772207 | cg16772207 | DMR_33 | 20      | 62795807 | F    | II   | MYT1    | TSS200 | opensea  | TSS200-opensea |
| cg10071275 | cg10071275 | DMR_33 | 20      | 62795830 | R    | II   | MYT1    | 5'UTR  | opensea  | 5'UTR-opensea  |
| cg06235575 | cg06235575 | DMR_33 | 20      | 62795838 | R    | II   | MYT1    | 5'UTR  | opensea  | 5'UTR-opensea  |
| cg02866152 | cg02866152 | DMR_33 | 20      | 62795846 | F    | II   | MYT1    | 5'UTR  | opensea  | 5'UTR-opensea  |
| cg25457884 | cg25457884 | DMR_33 | 20      | 62796136 | R    | II   | MYT1    | 5'UTR  | opensea  | 5'UTR-opensea  |
| cg01555764 | cg01555764 | DMR_33 | 20      | 62796178 | F    | II   | MYT1    | 5'UTR  | opensea  | 5'UTR-opensea  |

Showing 1 to 8 of 8 entries

Previous **1** Next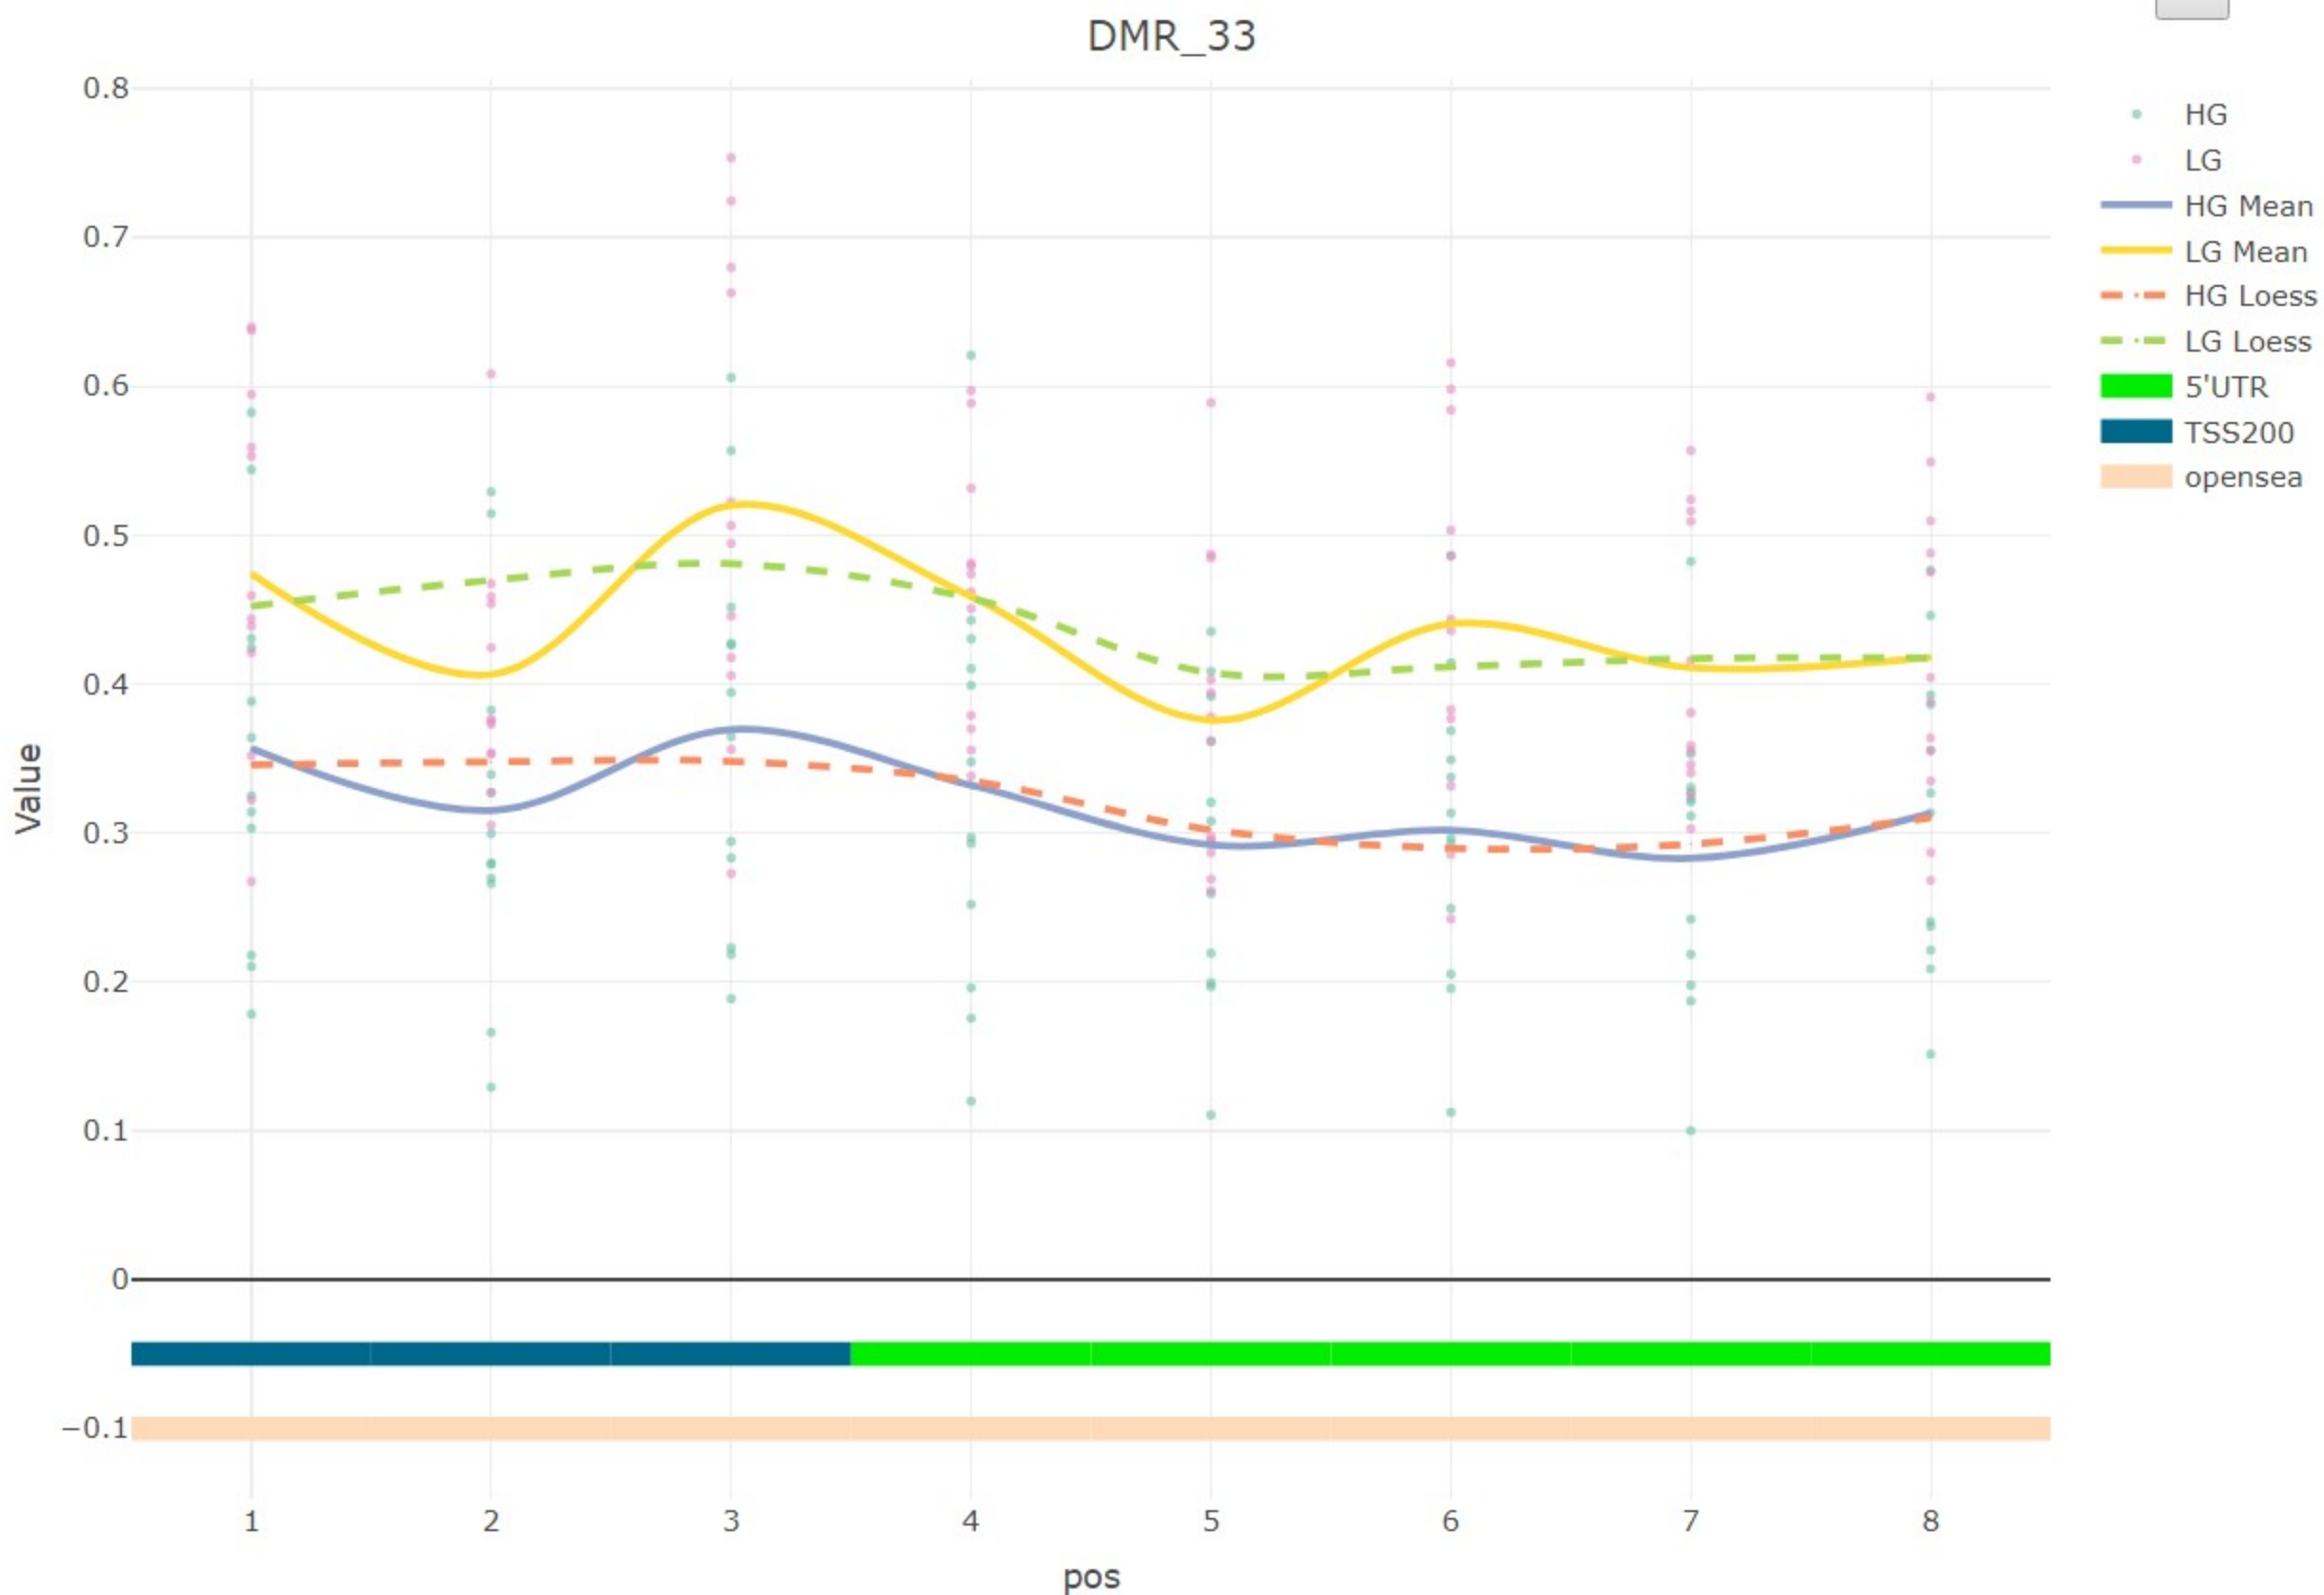

Show  entriesSearch: 

|            | ID         | DMRindex | CHR | MAPINFO  | Strand | Type | gene | feature | cgi     | feat.cgi        |
|------------|------------|----------|-----|----------|--------|------|------|---------|---------|-----------------|
| cg02404377 | cg02404377 | DMR_55   | 11  | 20043971 | F      | II   | NAV2 | TSS1500 | opensea | TSS1500-opensea |
| cg10435384 | cg10435384 | DMR_55   | 11  | 20044039 | R      | II   | NAV2 | TSS200  | opensea | TSS200-opensea  |
| cg01206071 | cg01206071 | DMR_55   | 11  | 20044133 | R      | II   | NAV2 | 1stExon | opensea | 1stExon-opensea |
| cg25915940 | cg25915940 | DMR_55   | 11  | 20044340 | F      | II   | NAV2 | 1stExon | opensea | 1stExon-opensea |
| cg19222784 | cg19222784 | DMR_55   | 11  | 20044428 | F      | II   | NAV2 | TSS1500 | opensea | TSS1500-opensea |
| cg20949700 | cg20949700 | DMR_55   | 11  | 20044468 | R      | II   | NAV2 | Body    | opensea | Body-opensea    |
| cg09571376 | cg09571376 | DMR_55   | 11  | 20044622 | R      | II   | NAV2 | Body    | opensea | Body-opensea    |
| cg26869615 | cg26869615 | DMR_55   | 11  | 20044639 | R      | II   | NAV2 | Body    | opensea | Body-opensea    |

Showing 1 to 8 of 8 entries

Previous  Next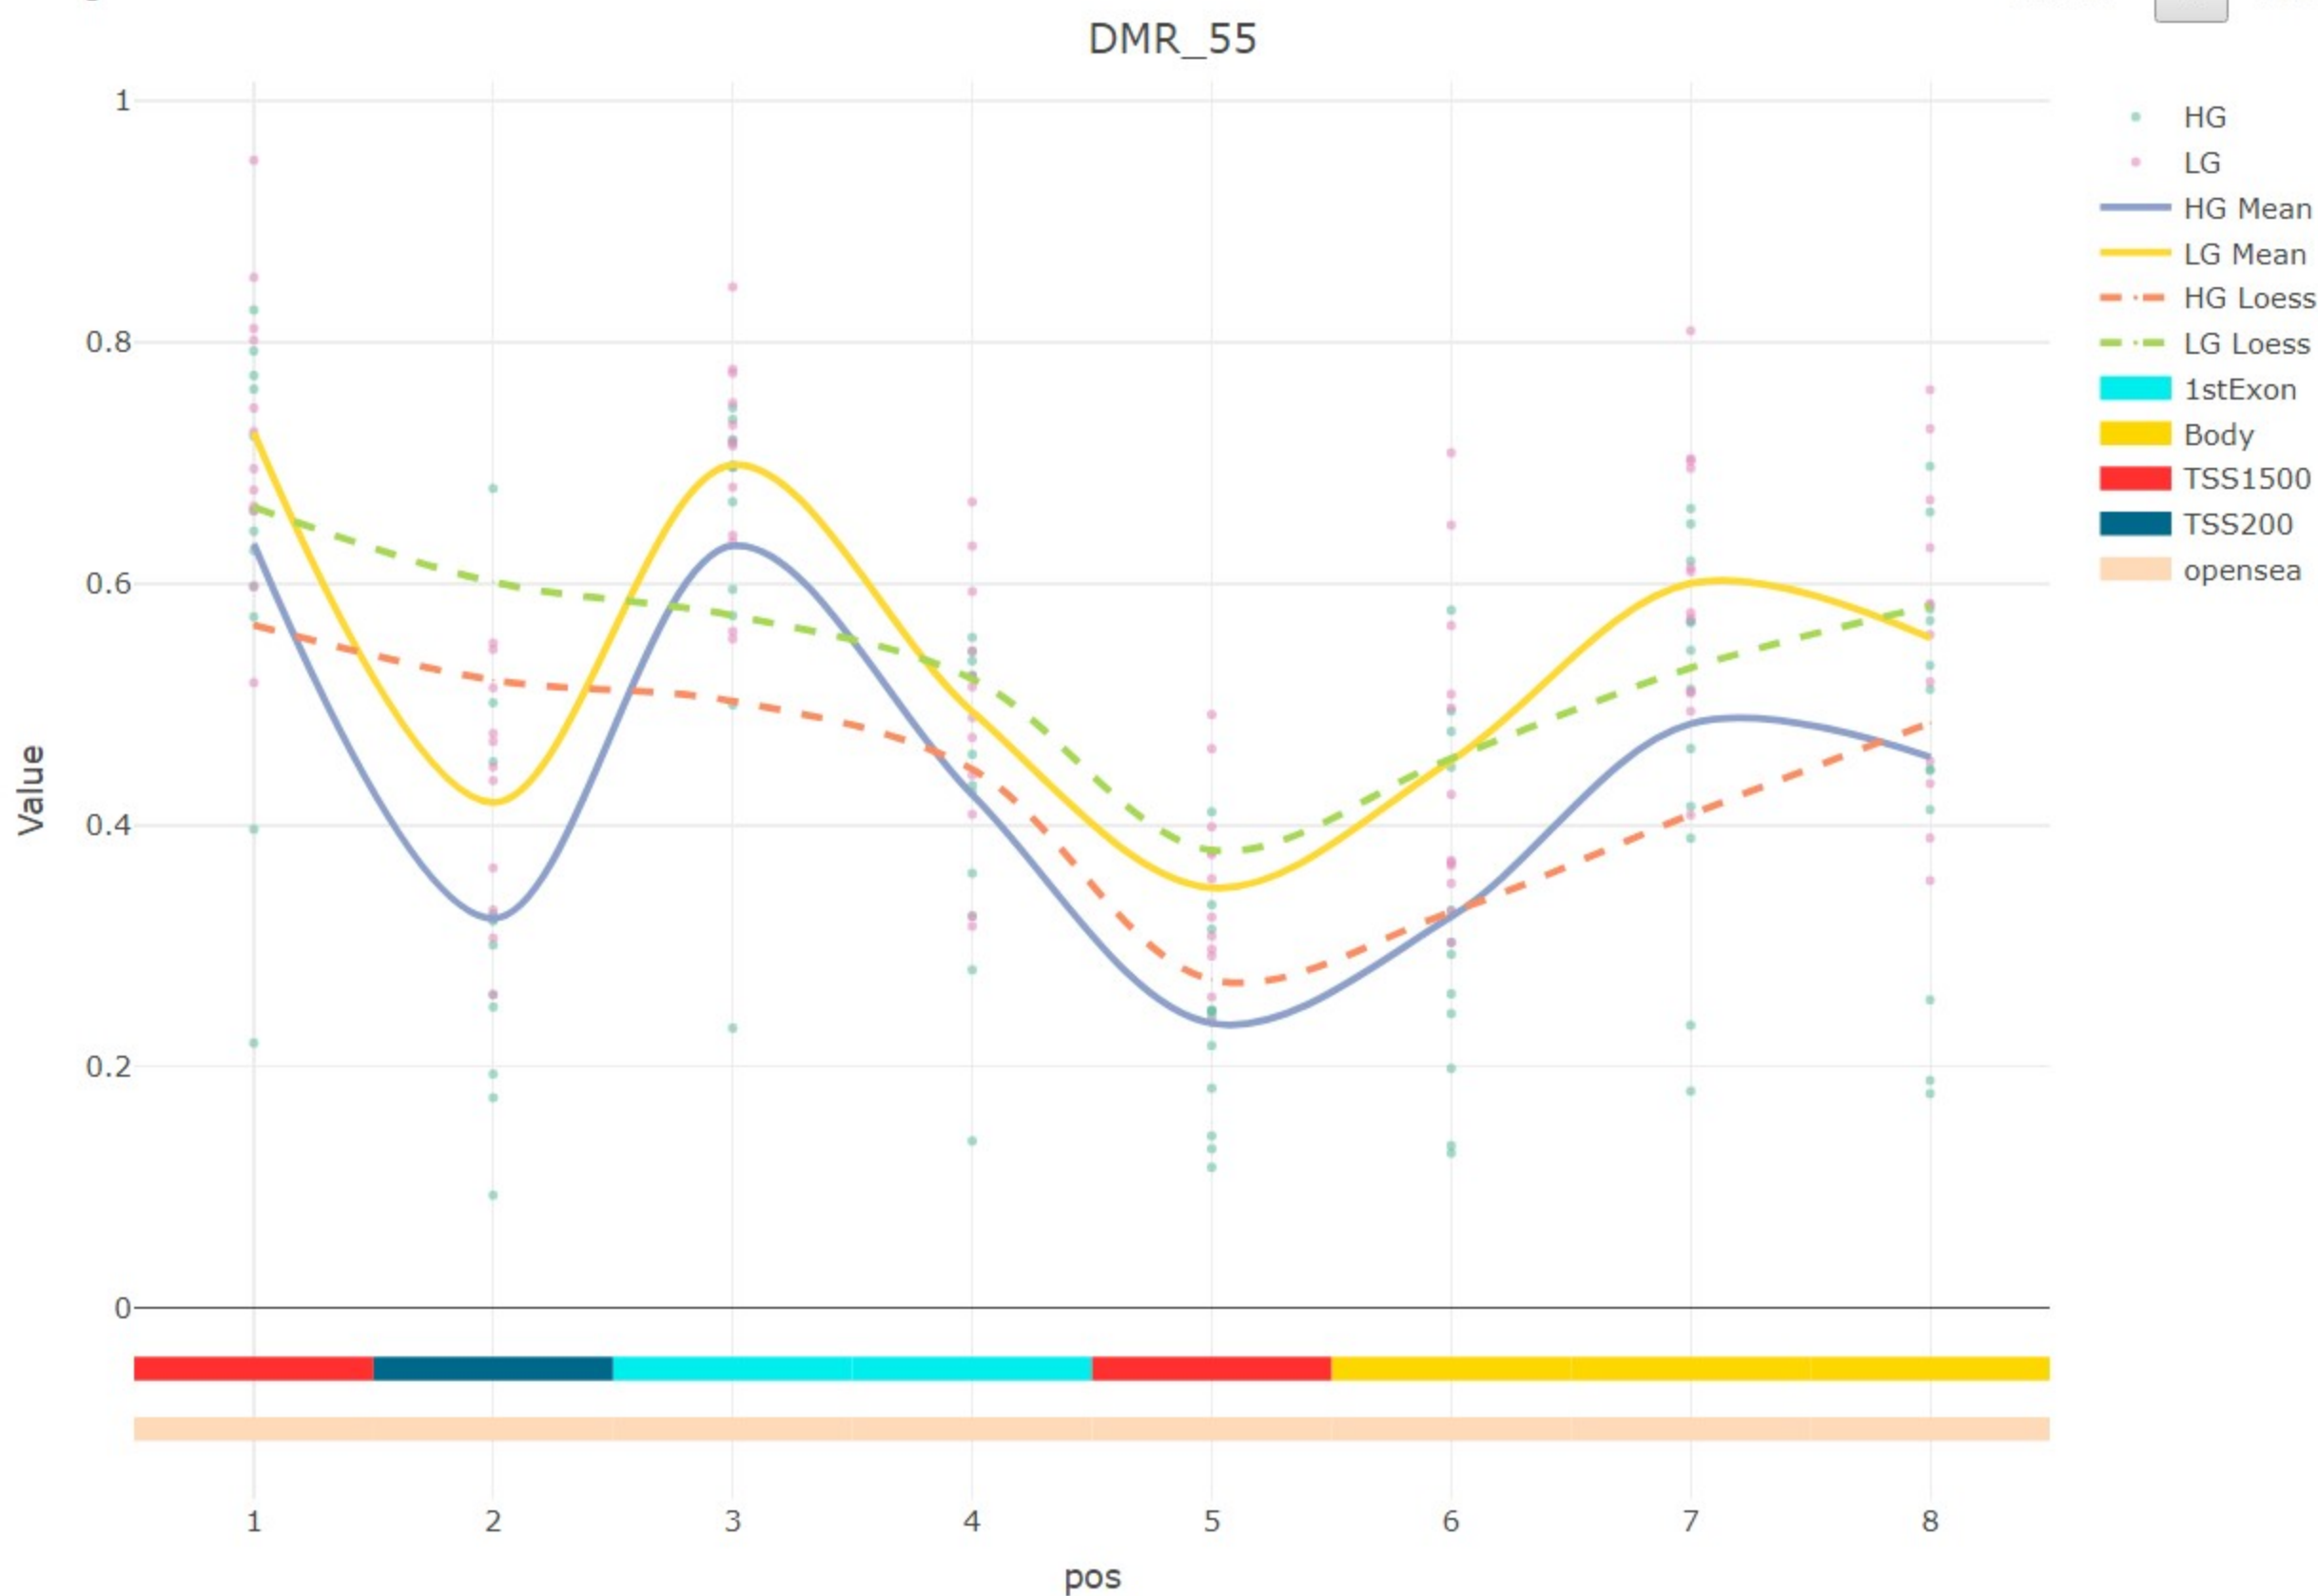

Show  entriesSearch: 

|            | ID         | DMRindex | CHR | MAPINFO  | Strand | Type | gene | feature | cgi    | feat.cgi    |
|------------|------------|----------|-----|----------|--------|------|------|---------|--------|-------------|
| cg17130131 | cg17130131 | DMR_14   | 19  | 13123973 | R      | II   | NFIX | Body    | island | Body-island |
| cg15054077 | cg15054077 | DMR_14   | 19  | 13124215 | F      | II   | NFIX | Body    | island | Body-island |
| cg12509887 | cg12509887 | DMR_14   | 19  | 13124291 | R      | II   | NFIX | Body    | island | Body-island |
| cg12403514 | cg12403514 | DMR_14   | 19  | 13124343 | F      | II   | NFIX | Body    | island | Body-island |
| cg08420572 | cg08420572 | DMR_14   | 19  | 13124604 | F      | I    | NFIX | Body    | island | Body-island |
| cg03675258 | cg03675258 | DMR_14   | 19  | 13124691 | R      | II   | NFIX | Body    | island | Body-island |
| cg24102622 | cg24102622 | DMR_14   | 19  | 13124776 | F      | II   | NFIX | Body    | island | Body-island |
| cg25716814 | cg25716814 | DMR_14   | 19  | 13124960 | R      | II   | NFIX | Body    | island | Body-island |
| cg20454073 | cg20454073 | DMR_14   | 19  | 13125084 | R      | I    | NFIX | Body    | island | Body-island |
| cg27304533 | cg27304533 | DMR_14   | 19  | 13125170 | F      | II   | NFIX | Body    | island | Body-island |
| cg17928147 | cg17928147 | DMR_14   | 19  | 13125281 | R      | I    | NFIX | Body    | shore  | Body-shore  |

Showing 1 to 11 of 11 entries

Previous  Next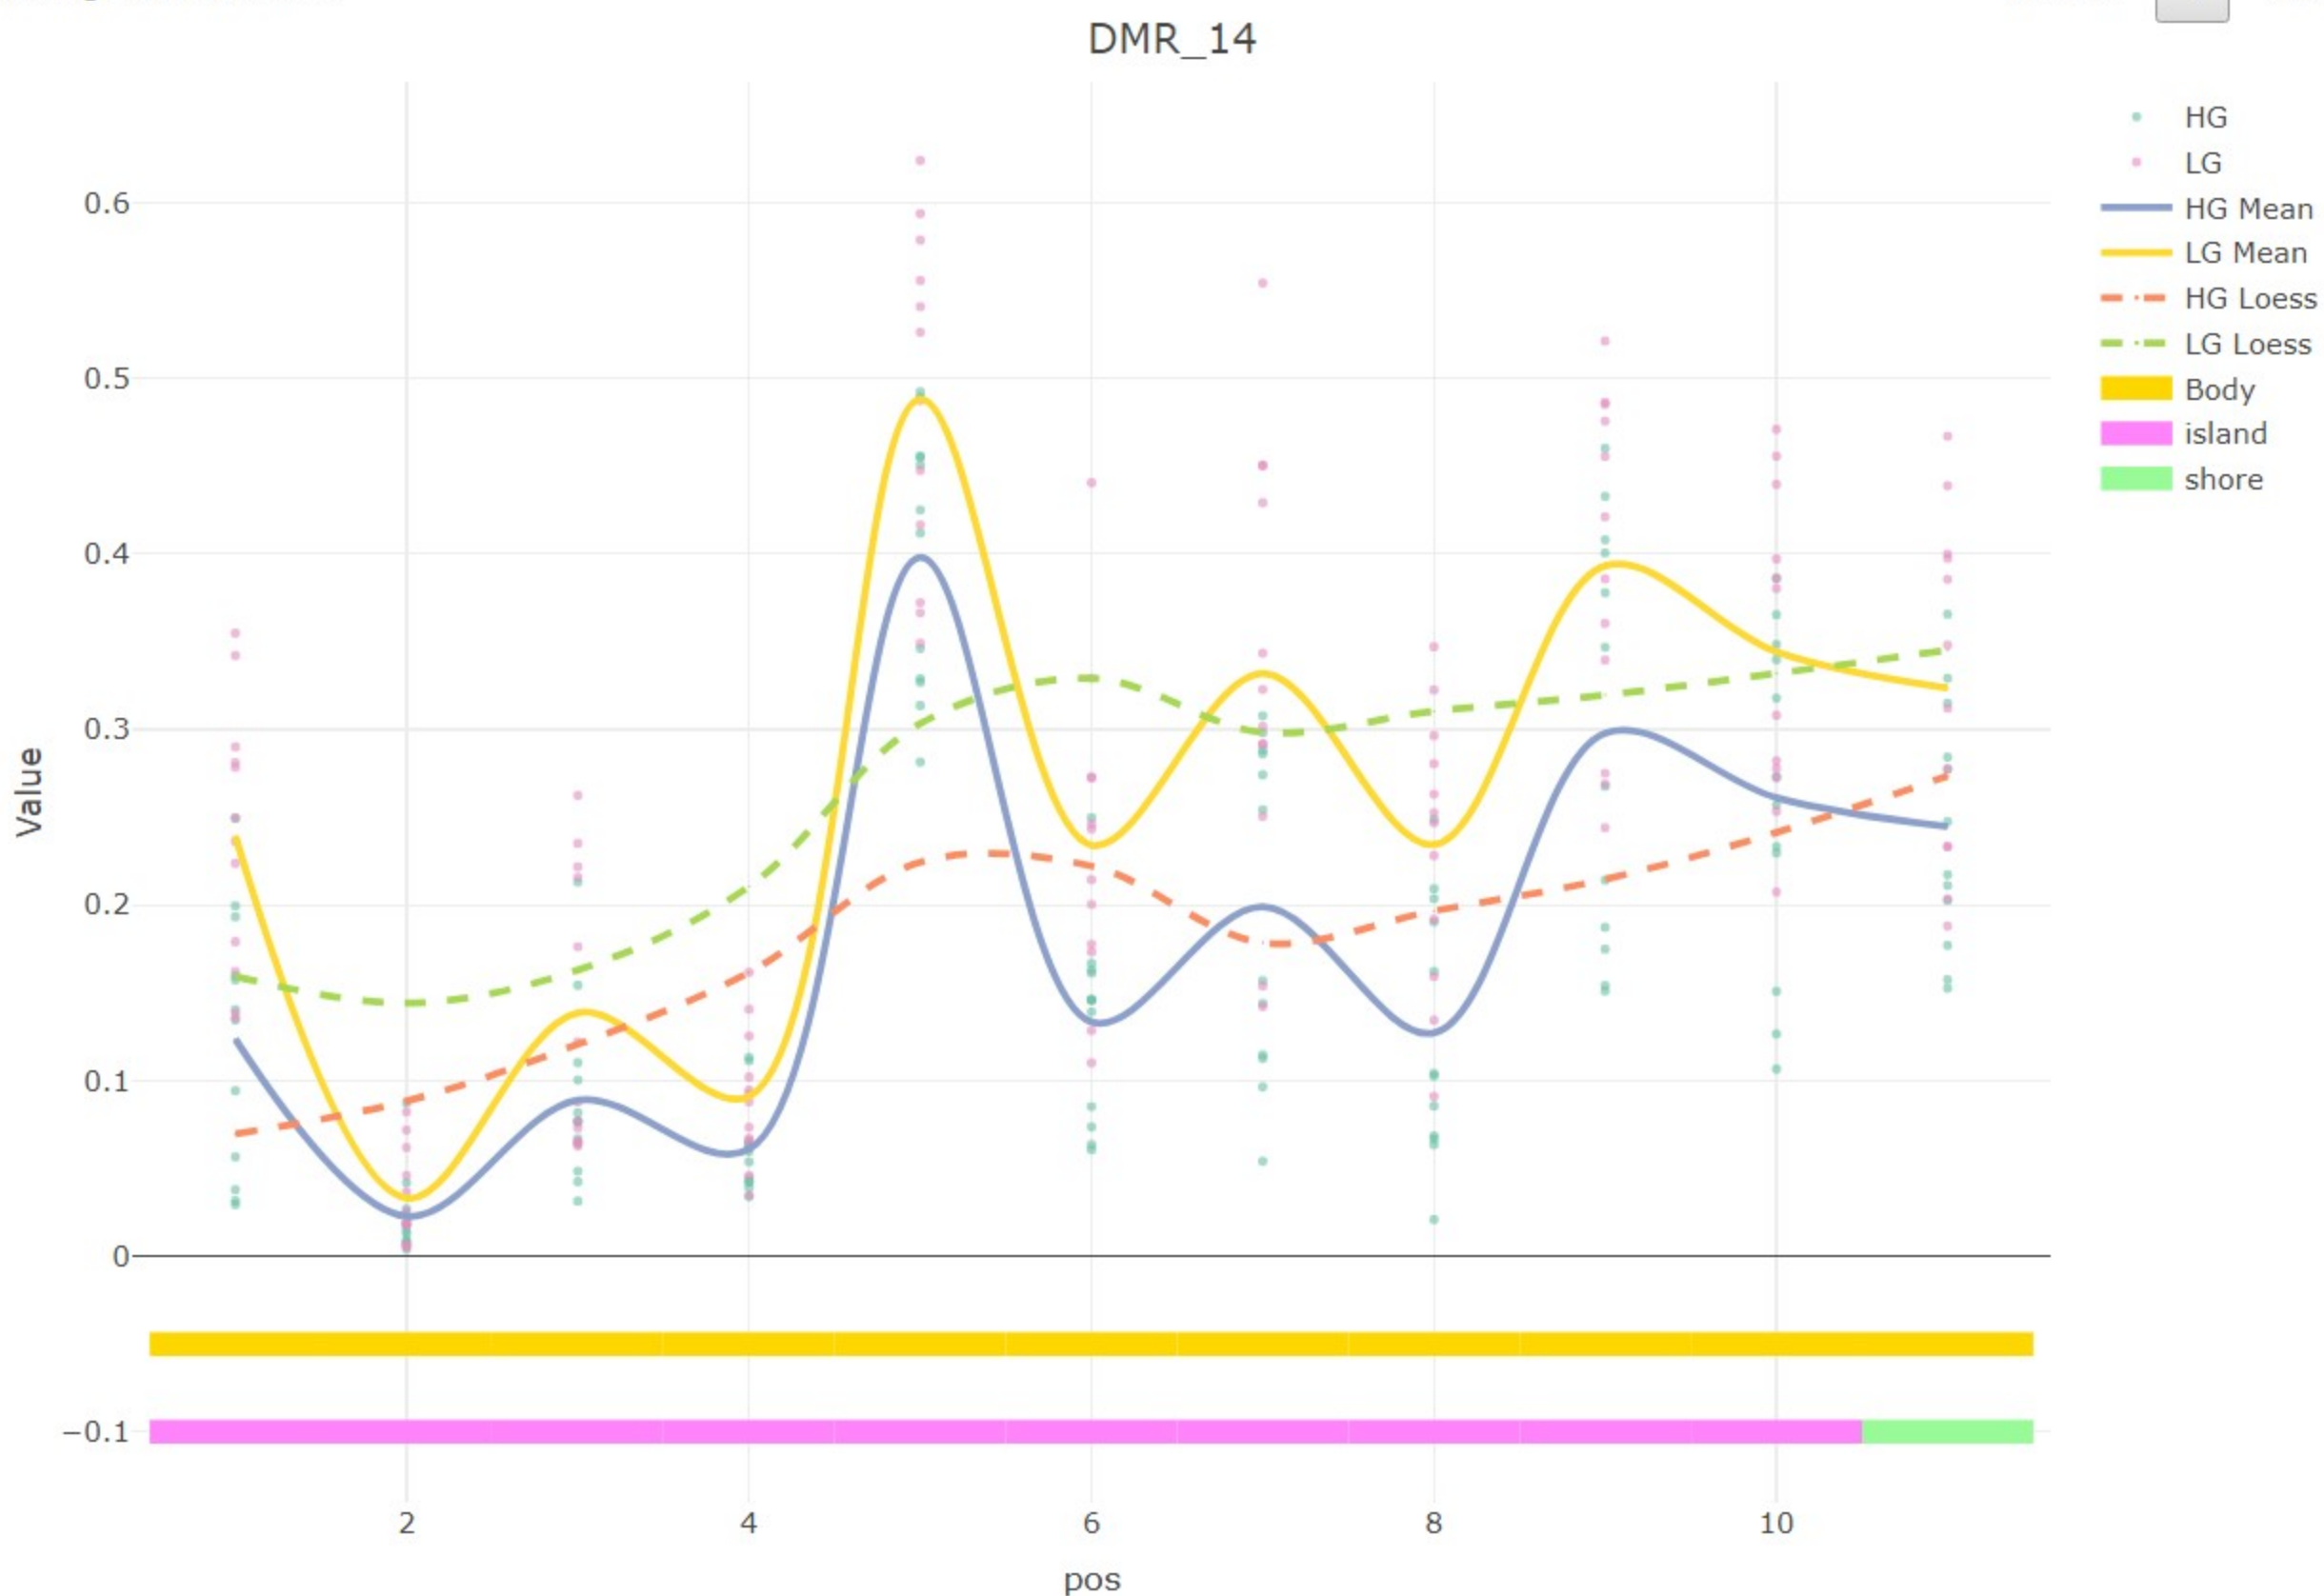

Show **8** entriesSearch: 

| ID         | DMRindex   | CHR    | MAPINFO | Strand   | Type | gene | feature | cgi  | feat.cgi |             |
|------------|------------|--------|---------|----------|------|------|---------|------|----------|-------------|
| cg18297736 | cg18297736 | DMR_35 | 4       | 85416865 | F    | II   | NKX6-1  | Body | shore    | Body-shore  |
| cg22256677 | cg22256677 | DMR_35 | 4       | 85416951 | R    | II   | NKX6-1  | Body | shore    | Body-shore  |
| cg25830182 | cg25830182 | DMR_35 | 4       | 85417077 | F    | II   | NKX6-1  | Body | shore    | Body-shore  |
| cg24275315 | cg24275315 | DMR_35 | 4       | 85417312 | R    | II   | NKX6-1  | Body | shore    | Body-shore  |
| cg02489958 | cg02489958 | DMR_35 | 4       | 85417416 | F    | II   | NKX6-1  | Body | shore    | Body-shore  |
| cg27406678 | cg27406678 | DMR_35 | 4       | 85417612 | F    | II   | NKX6-1  | Body | shore    | Body-shore  |
| cg22598426 | cg22598426 | DMR_35 | 4       | 85417755 | F    | II   | NKX6-1  | Body | island   | Body-island |

Showing 1 to 7 of 7 entries

Previous **1** Next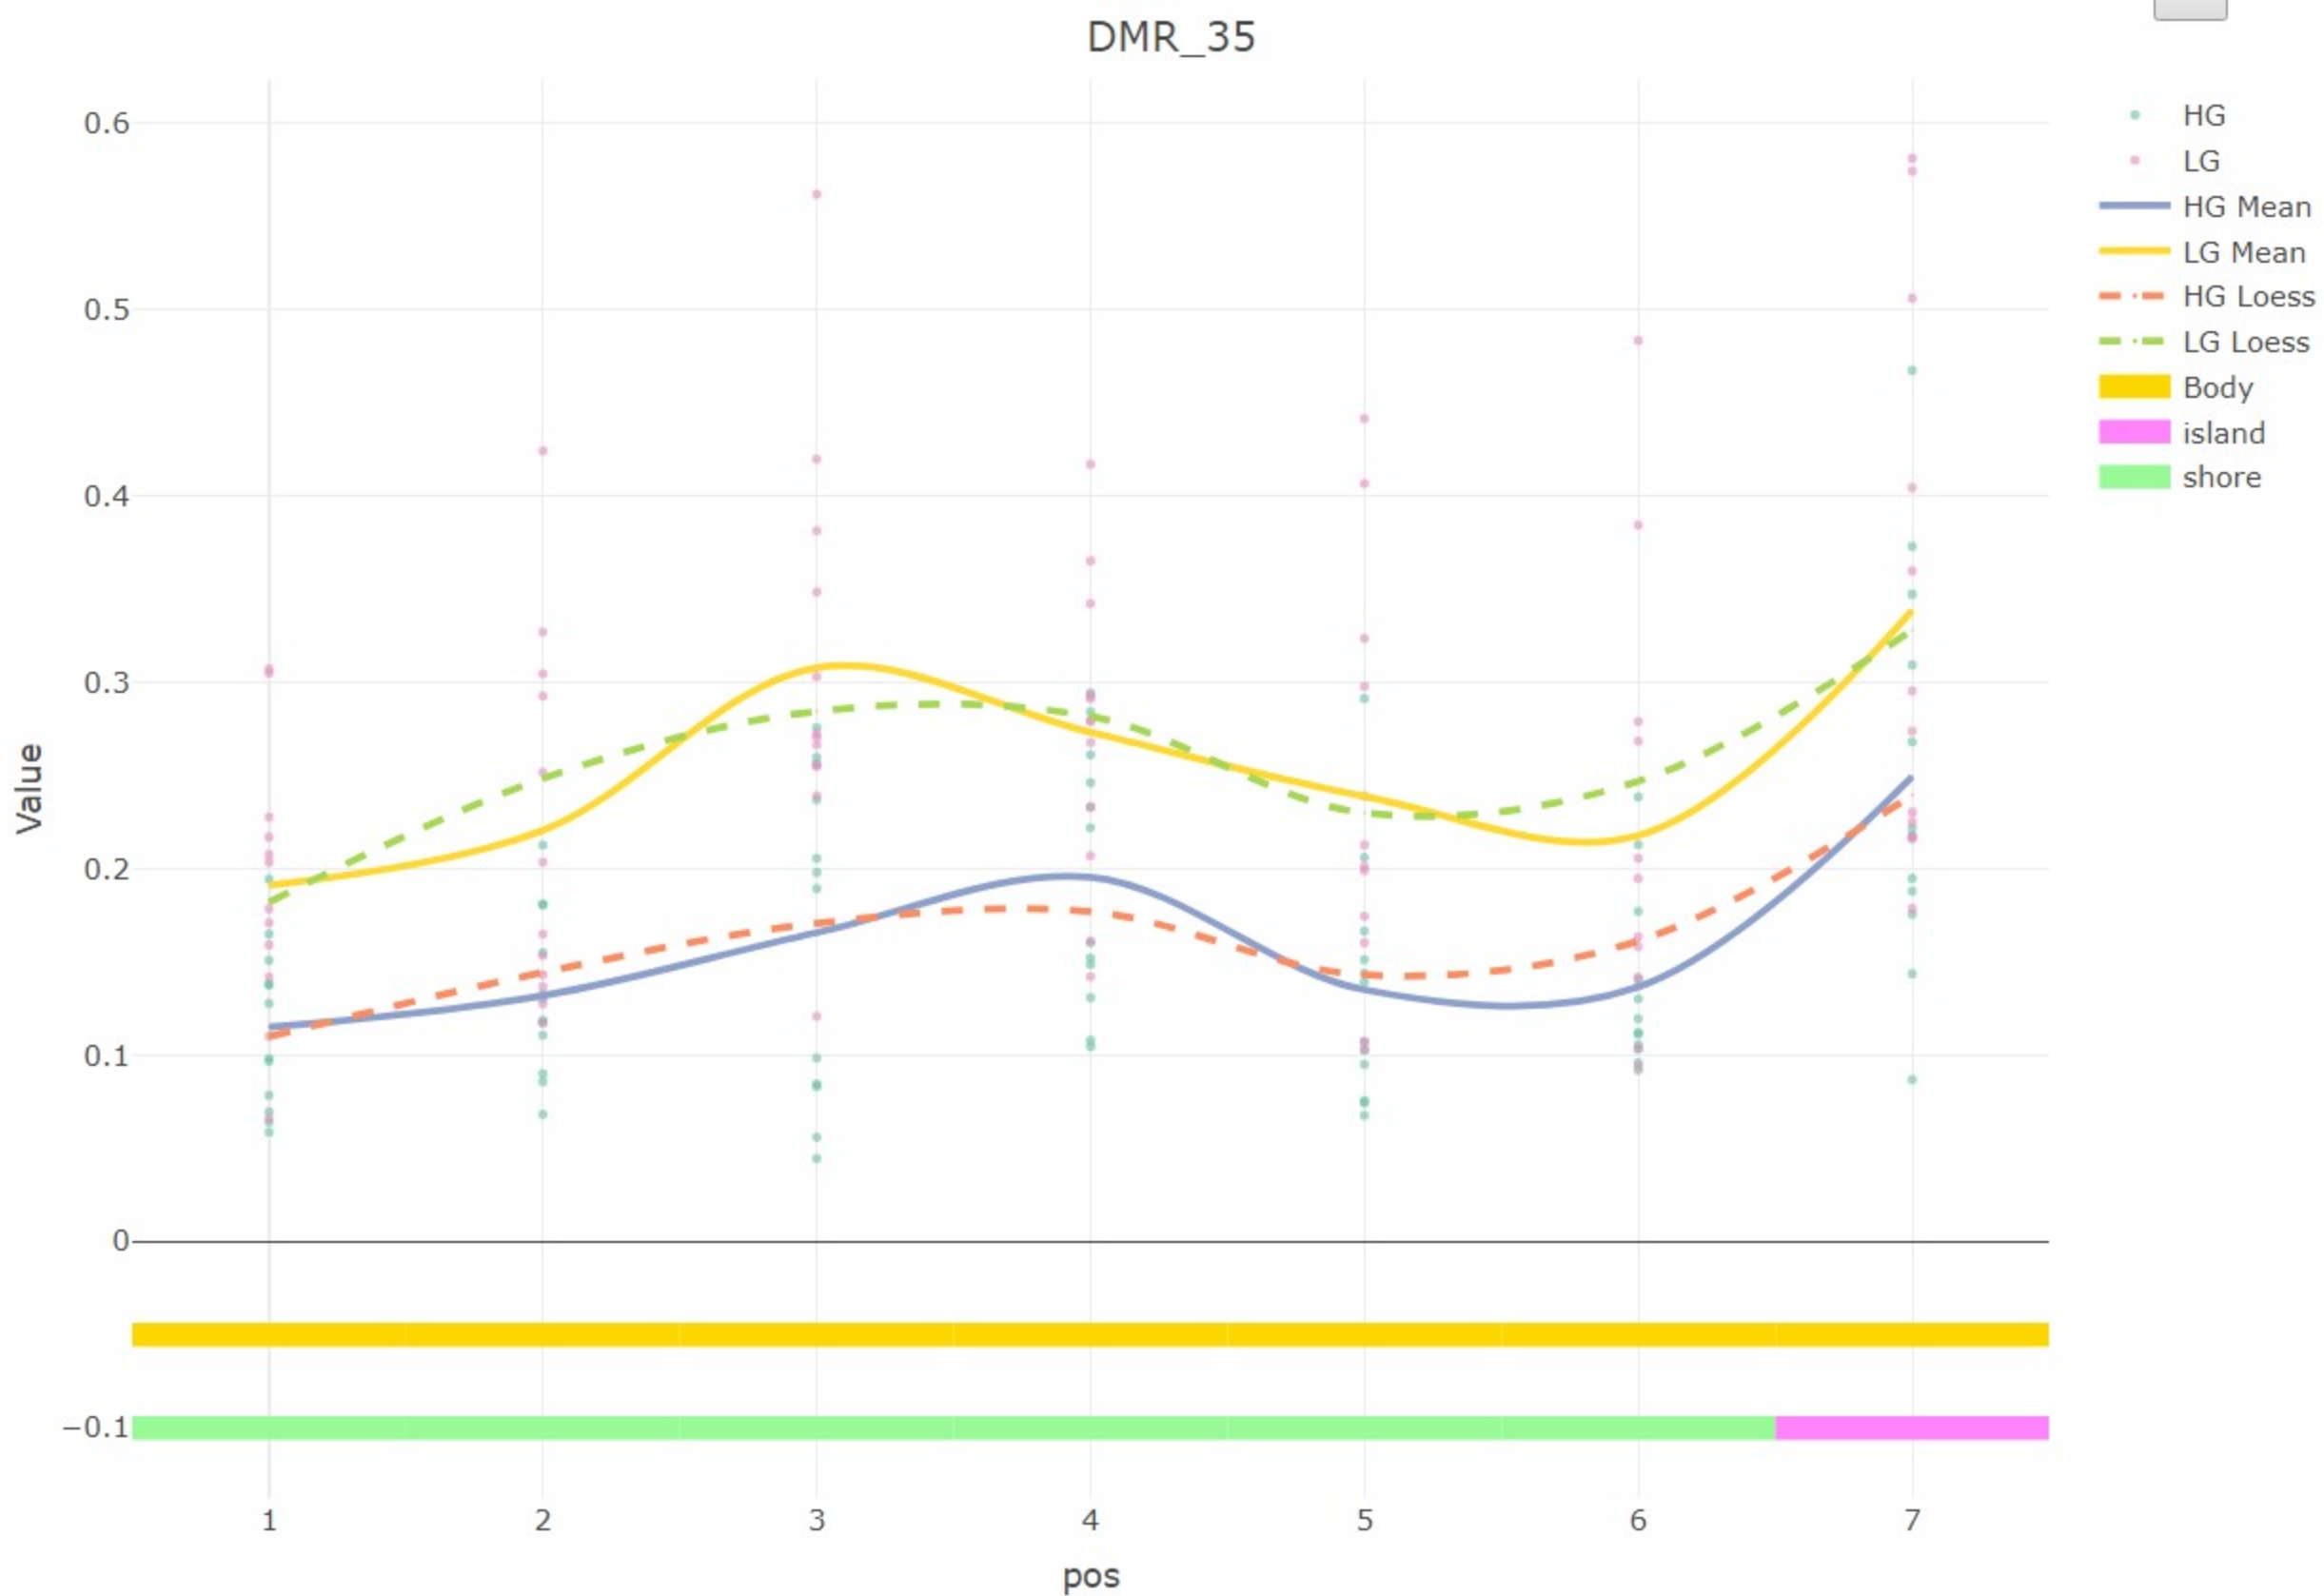

Show 8 entries

Search: 

| ID         | DMRindex   | CHR   | MAPINFO | Strand   | Type | gene | feature | cgi     | feat.cgi |                 |
|------------|------------|-------|---------|----------|------|------|---------|---------|----------|-----------------|
| cg08260395 | cg08260395 | DMR_6 | 19      | 16830287 | R    | II   | NWD1    | TSS1500 | opensea  | TSS1500-opensea |
| cg20398091 | cg20398091 | DMR_6 | 19      | 16830555 | F    | II   | NWD1    | TSS1500 | opensea  | TSS1500-opensea |
| cg13208063 | cg13208063 | DMR_6 | 19      | 16830563 | R    | II   | NWD1    | TSS1500 | opensea  | TSS1500-opensea |
| cg15845821 | cg15845821 | DMR_6 | 19      | 16830613 | R    | II   | NWD1    | TSS200  | opensea  | TSS200-opensea  |
| cg01649837 | cg01649837 | DMR_6 | 19      | 16830643 | R    | II   | NWD1    | TSS200  | opensea  | TSS200-opensea  |
| cg20249566 | cg20249566 | DMR_6 | 19      | 16830739 | R    | II   | NWD1    | TSS200  | opensea  | TSS200-opensea  |
| cg19784428 | cg19784428 | DMR_6 | 19      | 16830746 | R    | II   | NWD1    | TSS200  | opensea  | TSS200-opensea  |
| cg19344626 | cg19344626 | DMR_6 | 19      | 16830749 | R    | I    | NWD1    | TSS200  | opensea  | TSS200-opensea  |

Showing 1 to 8 of 9 entries

Previous 1 2 Next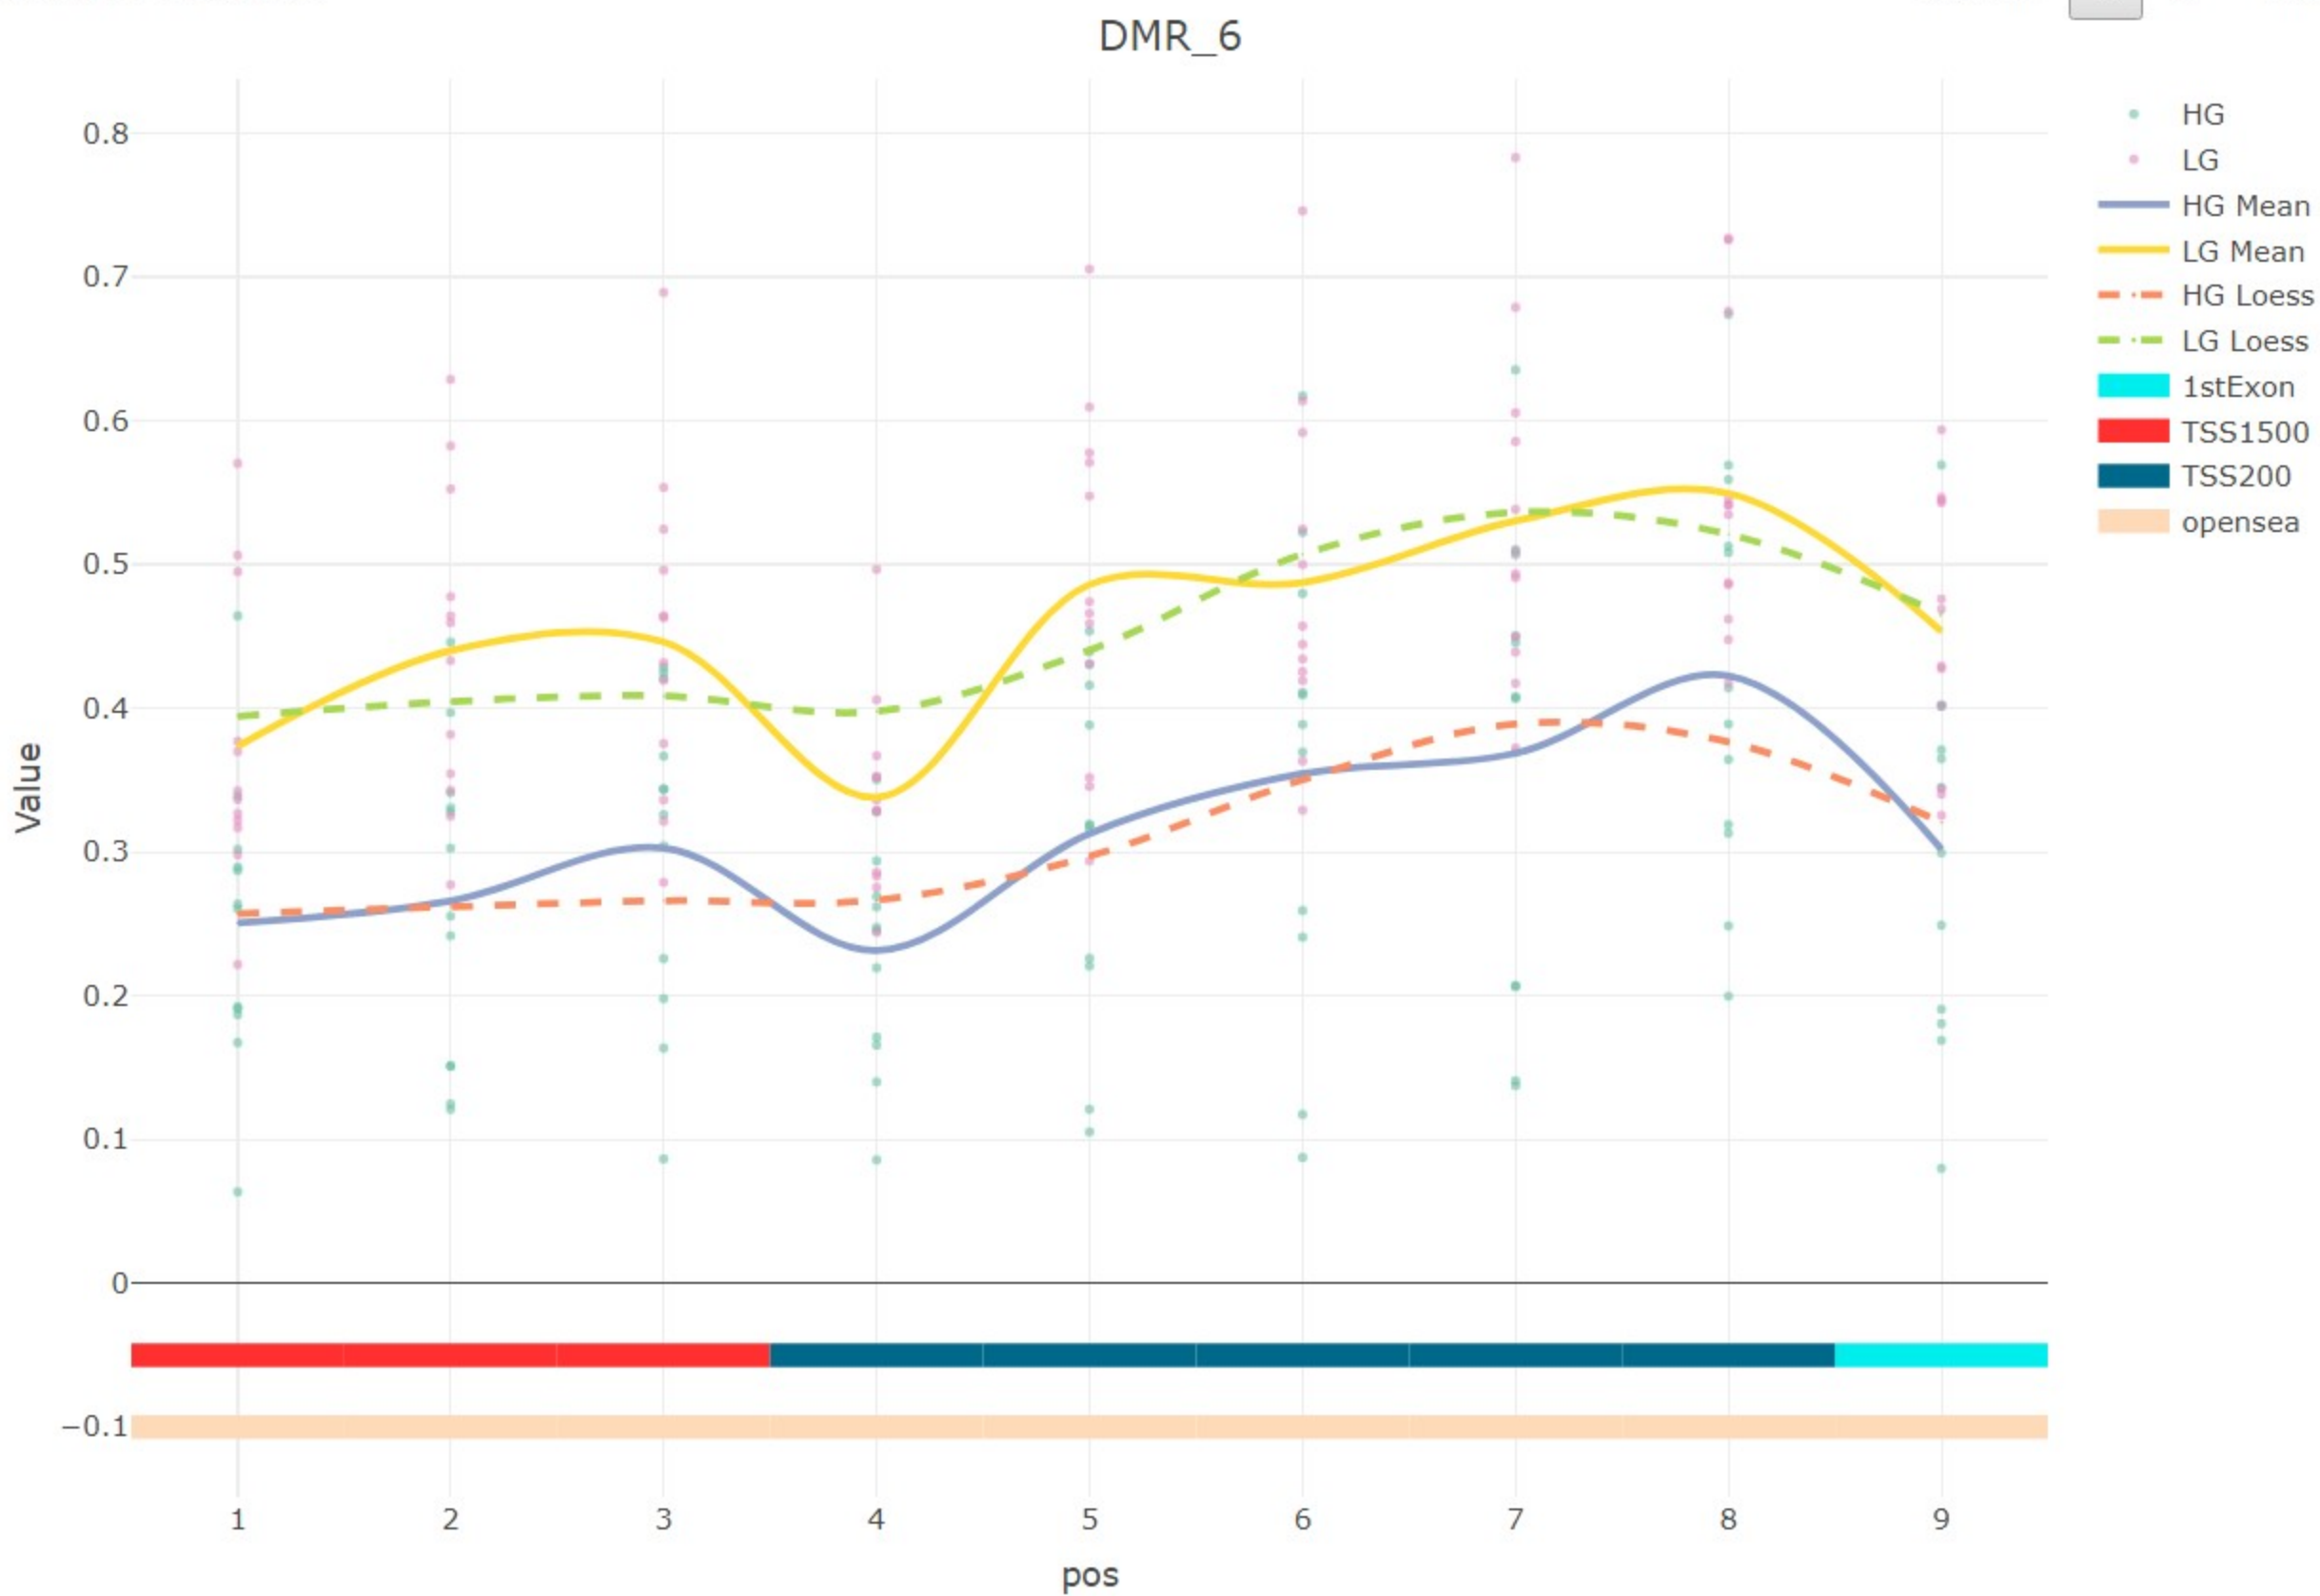

Show  entriesSearch: 

|            | ID         | DMRindex | CHR | MAPINFO | Strand | Type | gene    | feature | cgi     | feat.cgi        |
|------------|------------|----------|-----|---------|--------|------|---------|---------|---------|-----------------|
| cg04601090 | cg04601090 | DMR_54   | 1   | 6579837 | R      | II   | PLEKHG5 | 5'UTR   | opensea | 5'UTR-opensea   |
| cg18925980 | cg18925980 | DMR_54   | 1   | 6580110 | F      | II   | PLEKHG5 | 1stExon | opensea | 1stExon-opensea |
| cg04818845 | cg04818845 | DMR_54   | 1   | 6580167 | R      | II   | PLEKHG5 | TSS200  | opensea | TSS200-opensea  |
| cg04434328 | cg04434328 | DMR_54   | 1   | 6580173 | R      | II   | PLEKHG5 | TSS200  | opensea | TSS200-opensea  |
| cg13857119 | cg13857119 | DMR_54   | 1   | 6580308 | F      | II   | PLEKHG5 | TSS1500 | opensea | TSS1500-opensea |
| cg02600878 | cg02600878 | DMR_54   | 1   | 6580311 | F      | II   | PLEKHG5 | TSS200  | opensea | TSS200-opensea  |
| cg07408569 | cg07408569 | DMR_54   | 1   | 6580387 | R      | II   | PLEKHG5 | TSS1500 | opensea | TSS1500-opensea |
| cg06972903 | cg06972903 | DMR_54   | 1   | 6580525 | F      | II   | PLEKHG5 | TSS1500 | opensea | TSS1500-opensea |

Showing 1 to 8 of 8 entries

Previous  Next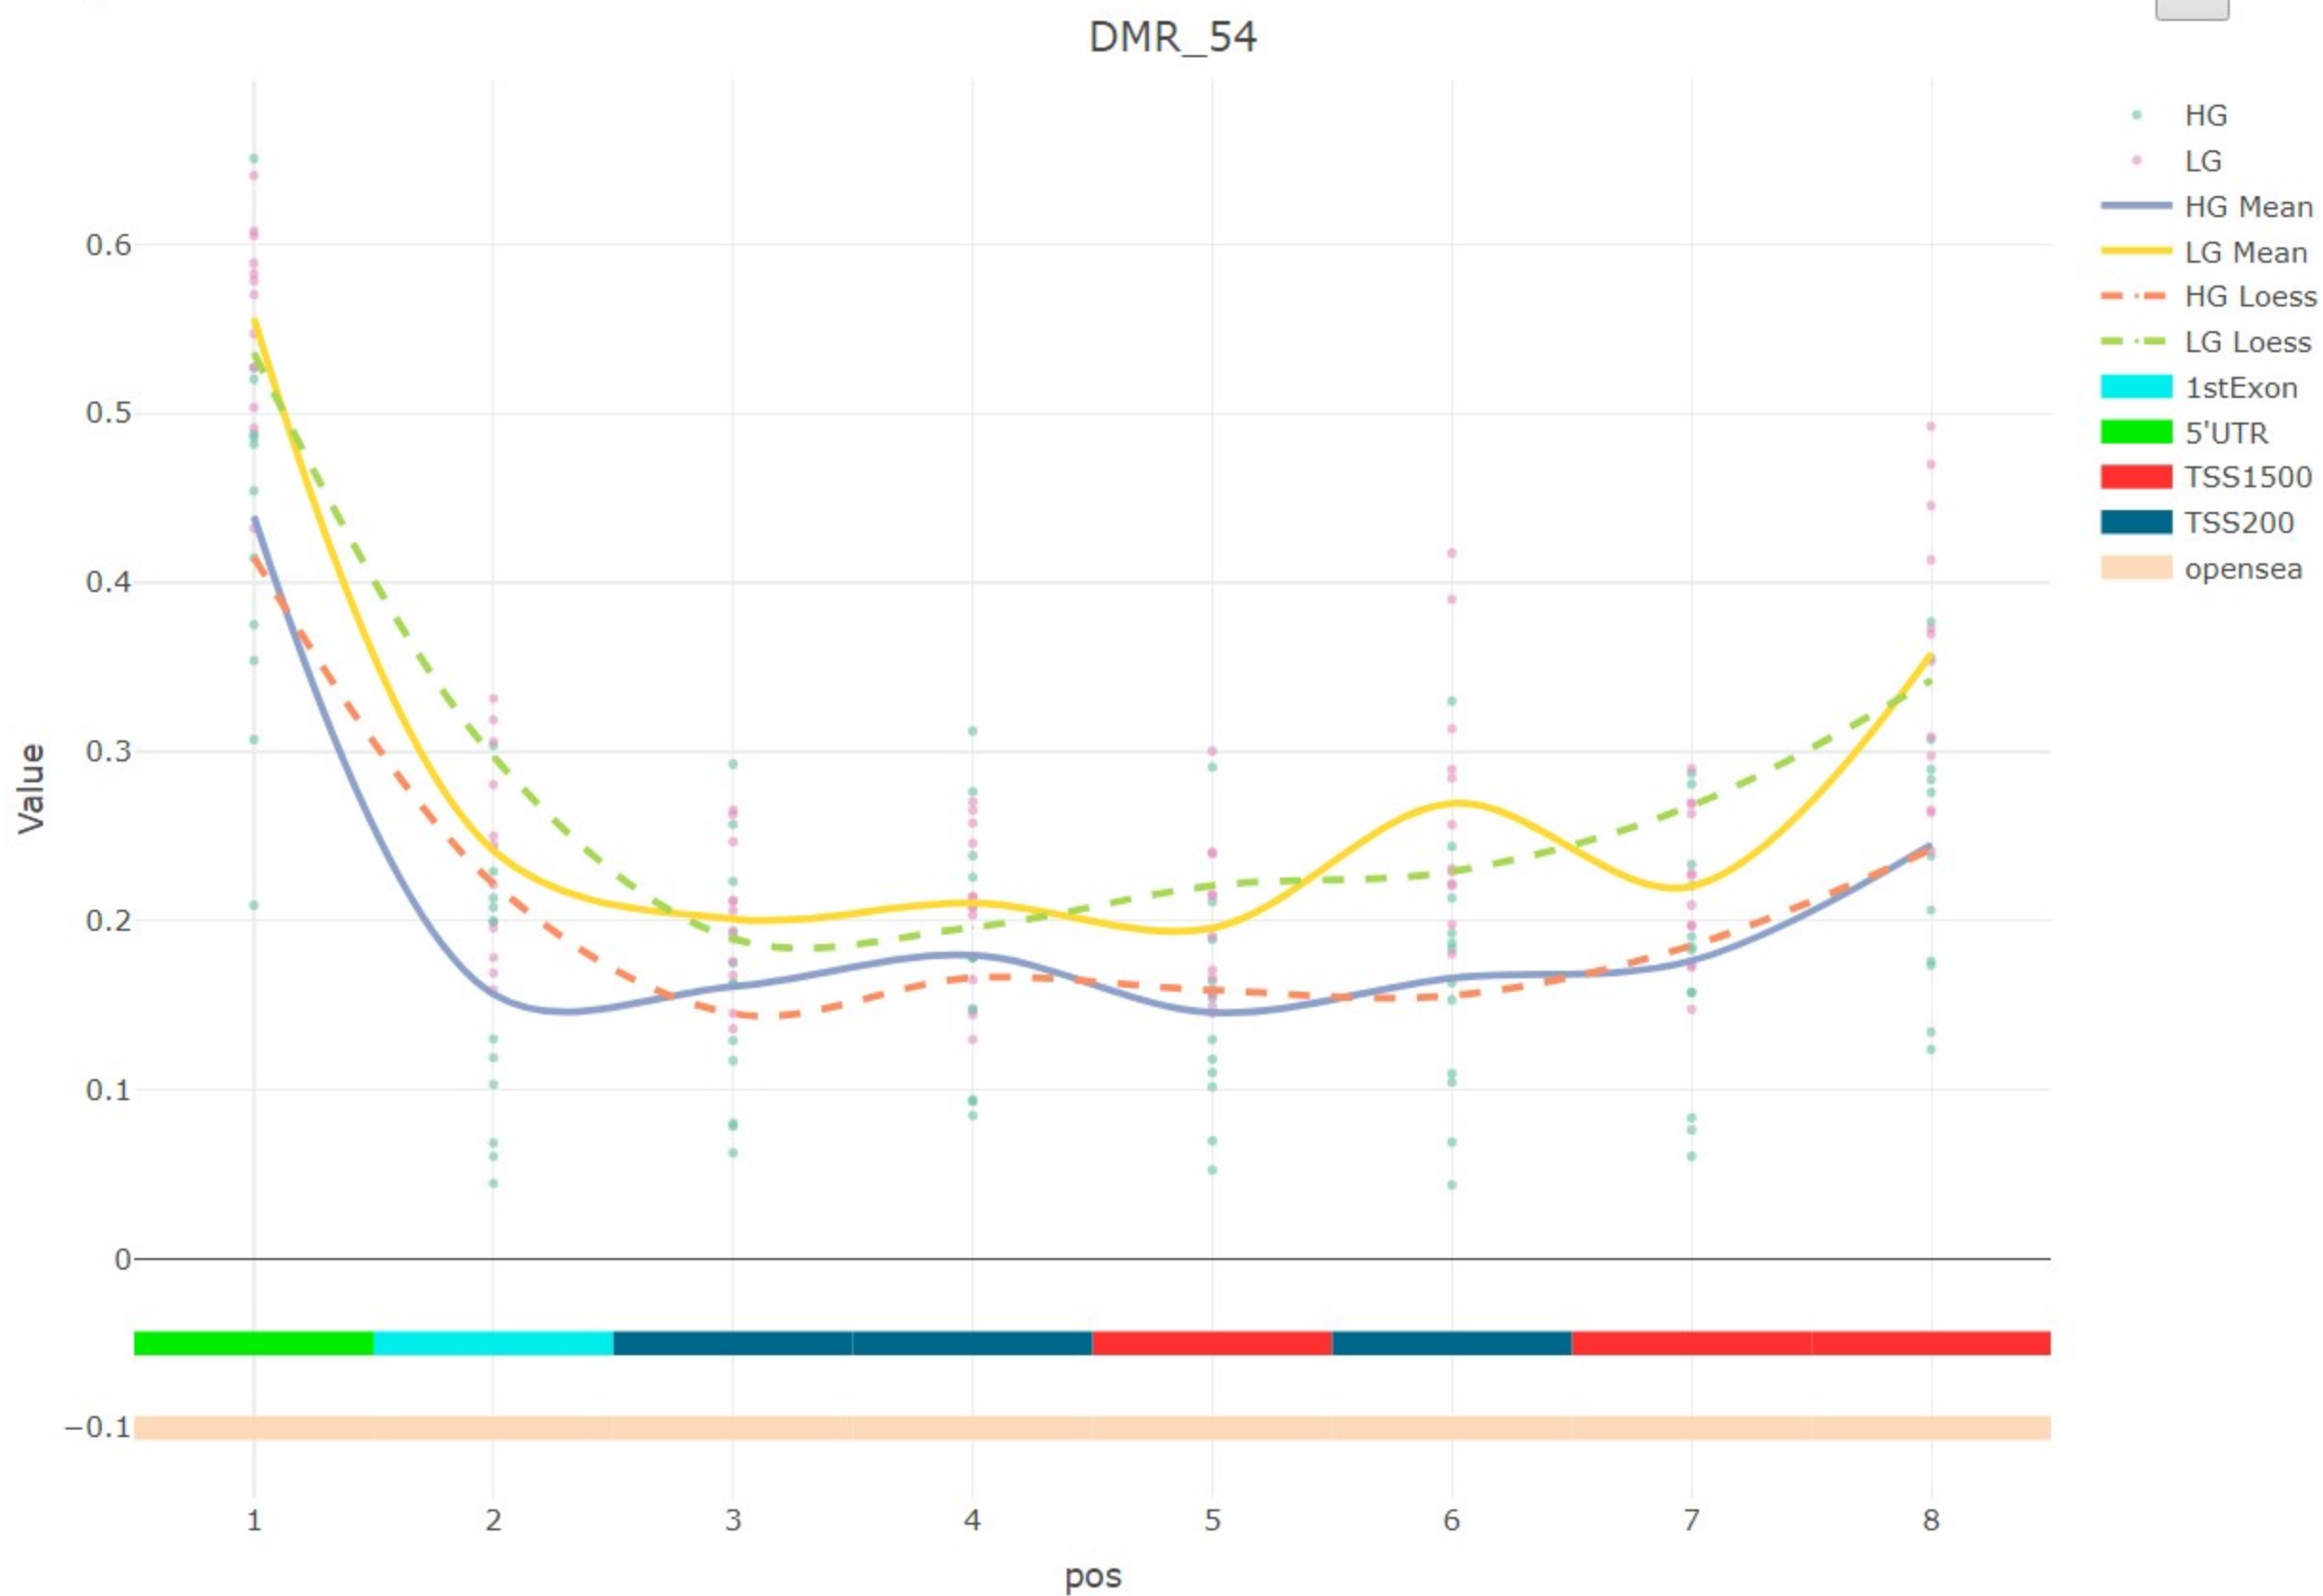



Show 8 entries

Search: 

| ID         | DMRindex   | CHR    | MAPINFO | Strand    | Type | gene | feature | cgi   | feat.cgi |               |
|------------|------------|--------|---------|-----------|------|------|---------|-------|----------|---------------|
| cg21753180 | cg21753180 | DMR_34 | 1       | 214169817 | F    | II   | PROX1   | 5'UTR | opensea  | 5'UTR-opensea |
| cg00346205 | cg00346205 | DMR_34 | 1       | 214169844 | F    | II   | PROX1   | 5'UTR | opensea  | 5'UTR-opensea |
| cg17880661 | cg17880661 | DMR_34 | 1       | 214169870 | R    | II   | PROX1   | 5'UTR | opensea  | 5'UTR-opensea |
| cg16382030 | cg16382030 | DMR_34 | 1       | 214169912 | R    | II   | PROX1   | Body  | opensea  | Body-opensea  |
| cg22800590 | cg22800590 | DMR_34 | 1       | 214170114 | F    | II   | PROX1   | Body  | opensea  | Body-opensea  |
| cg17829746 | cg17829746 | DMR_34 | 1       | 214170220 | F    | II   | PROX1   | Body  | opensea  | Body-opensea  |
| cg25379954 | cg25379954 | DMR_34 | 1       | 214170241 | F    | II   | PROX1   | Body  | opensea  | Body-opensea  |

Showing 1 to 7 of 7 entries

Previous  Next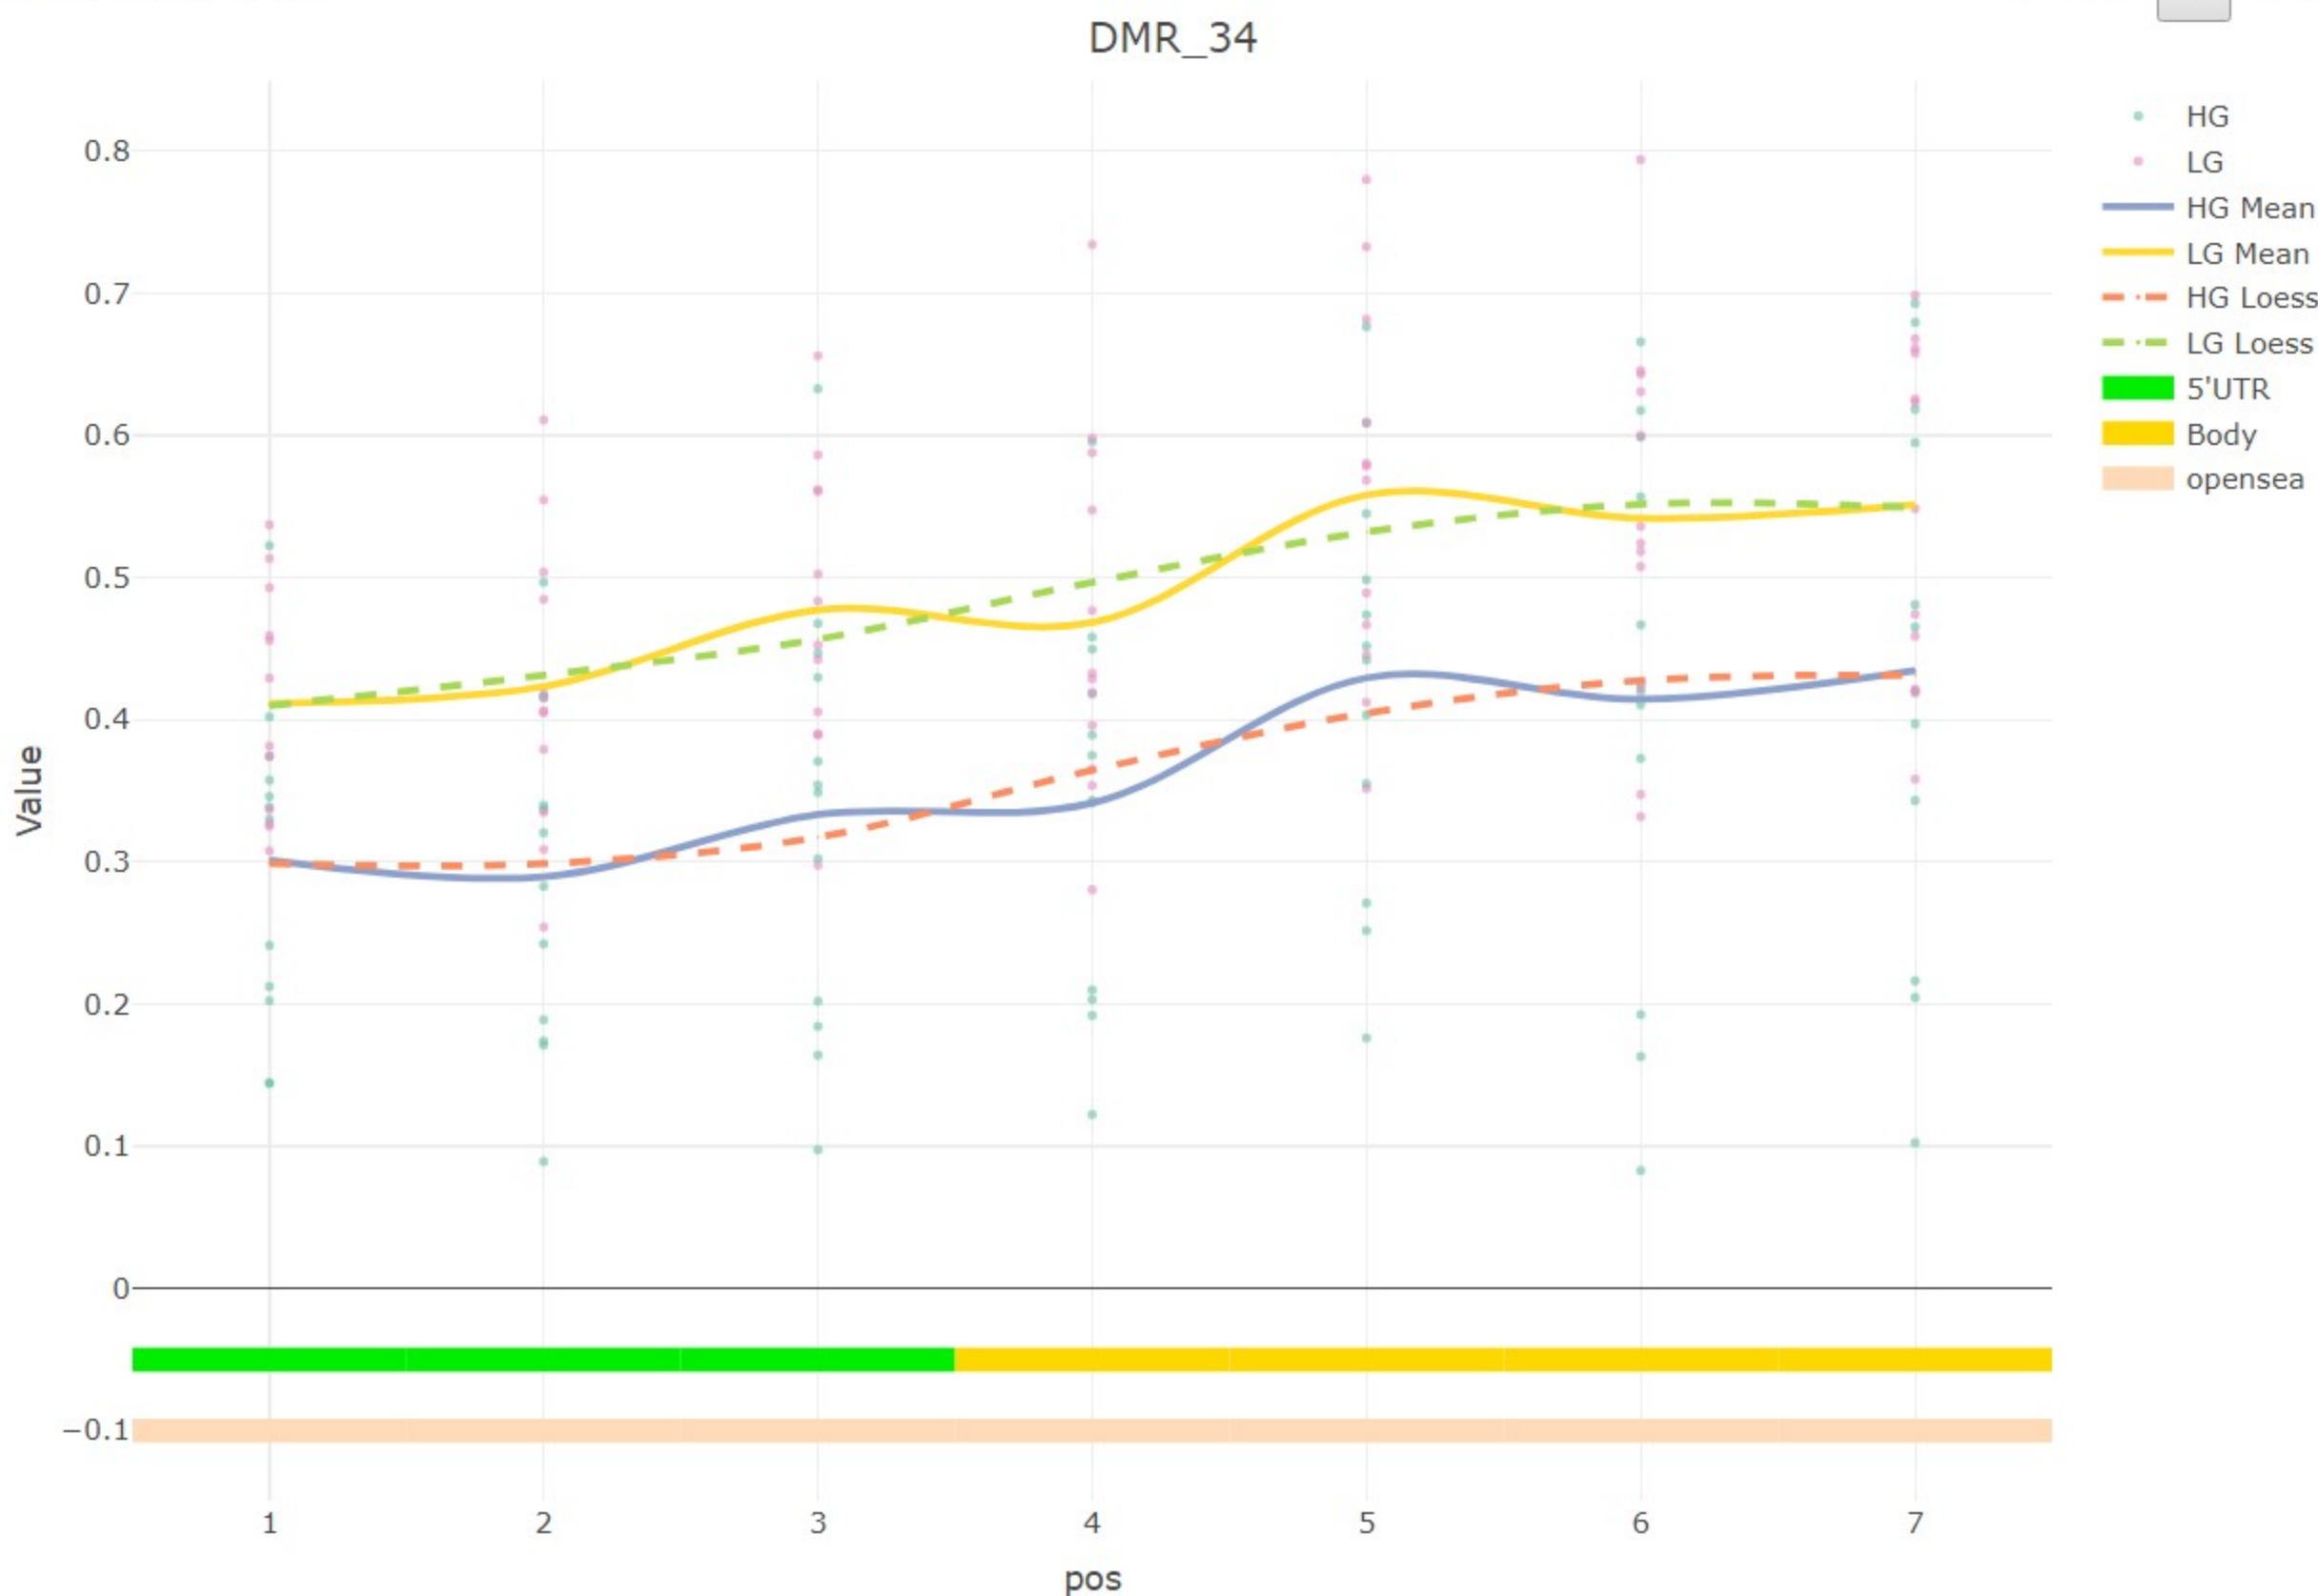

Show  entriesSearch: 

| ID         | DMRindex   | CHR    | MAPINFO | Strand    | Type | gene | feature | cgi  | feat.cgi |              |
|------------|------------|--------|---------|-----------|------|------|---------|------|----------|--------------|
| cg22676516 | cg22676516 | DMR_56 | 7       | 157808983 | R    | I    | PTPRN2  | Body | opensea  | Body-opensea |
| cg00280858 | cg00280858 | DMR_56 | 7       | 157809235 | F    | II   | PTPRN2  | Body | opensea  | Body-opensea |
| cg23455837 | cg23455837 | DMR_56 | 7       | 157809325 | R    | II   | PTPRN2  | Body | opensea  | Body-opensea |
| cg26320504 | cg26320504 | DMR_56 | 7       | 157809385 | R    | II   | PTPRN2  | Body | opensea  | Body-opensea |
| cg24072927 | cg24072927 | DMR_56 | 7       | 157809451 | F    | II   | PTPRN2  | Body | opensea  | Body-opensea |
| cg15948324 | cg15948324 | DMR_56 | 7       | 157809500 | F    | II   | PTPRN2  | Body | opensea  | Body-opensea |
| cg00239915 | cg00239915 | DMR_56 | 7       | 157809596 | R    | II   | PTPRN2  | Body | opensea  | Body-opensea |
| cg11805946 | cg11805946 | DMR_56 | 7       | 157809846 | F    | II   | PTPRN2  | Body | opensea  | Body-opensea |

Showing 1 to 8 of 8 entries

Previous  Next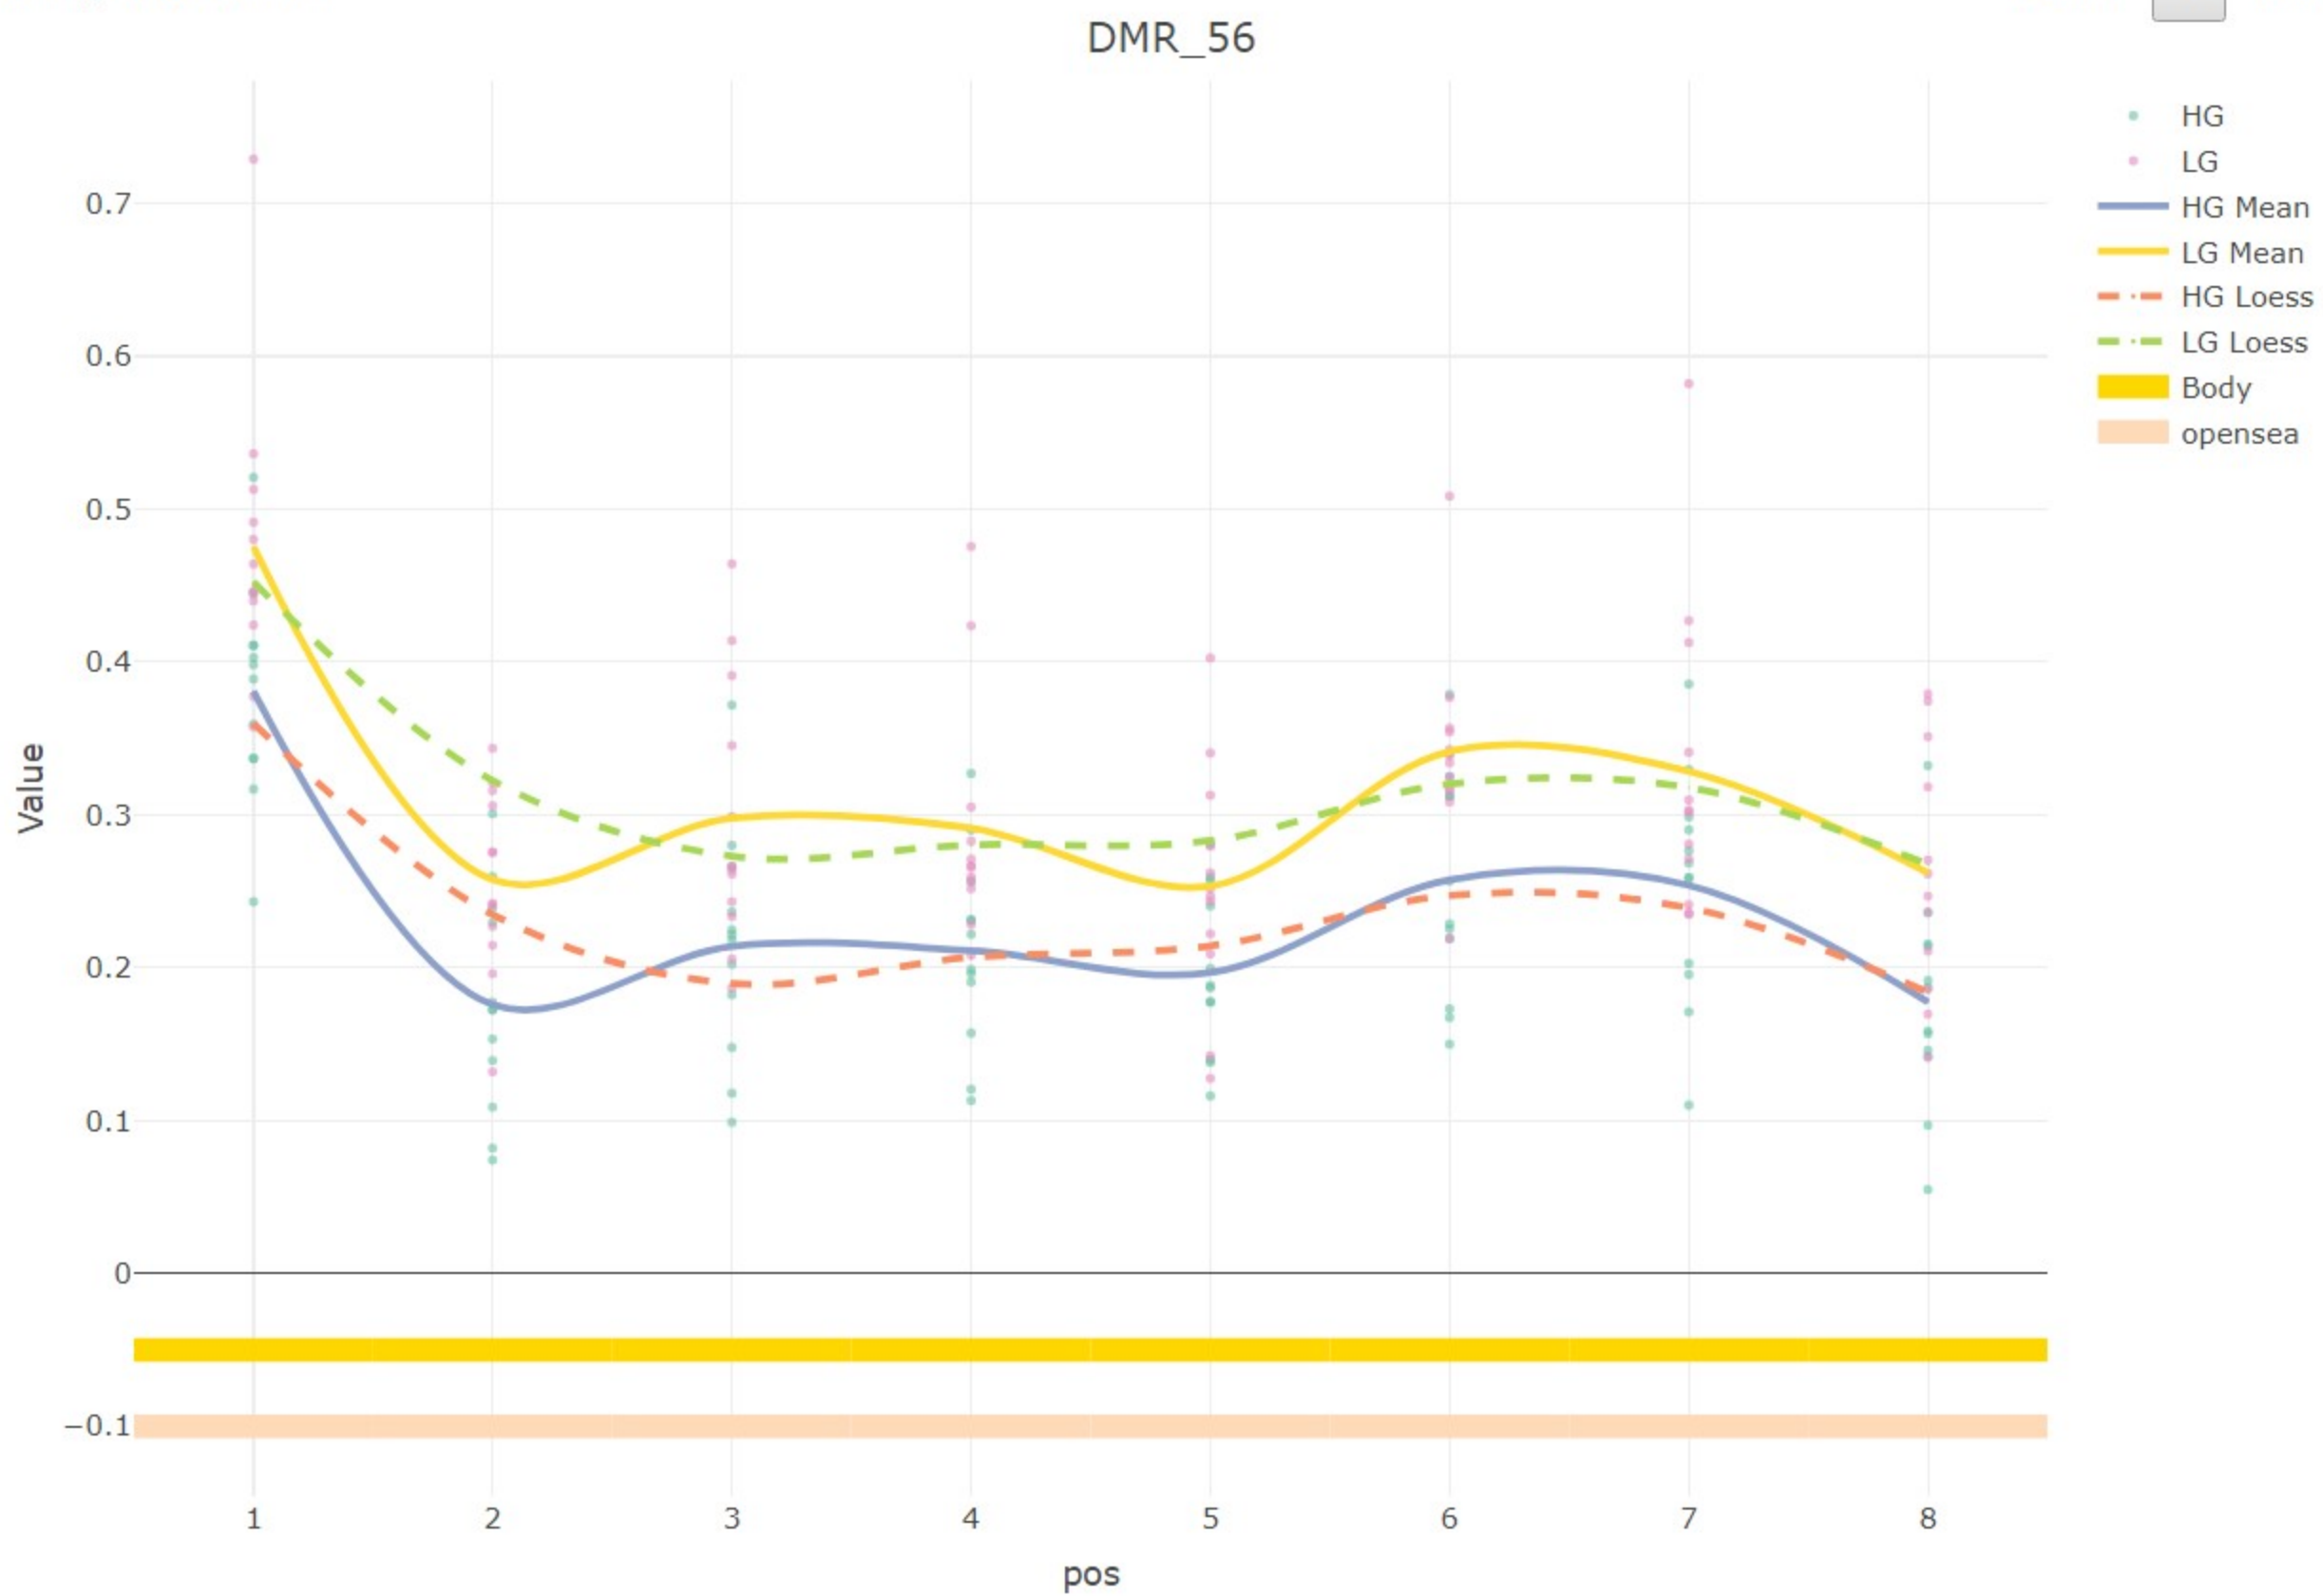

Show  entriesSearch: 

|            | ID         | DMRindex | CHR | MAPINFO  | Strand | Type | gene  | feature | cgi     | feat.cgi        |
|------------|------------|----------|-----|----------|--------|------|-------|---------|---------|-----------------|
| cg17979958 | cg17979958 | DMR_37   | 6   | 46293409 | F      | II   | RCAN2 | 1stExon | opensea | 1stExon-opensea |
| cg02512697 | cg02512697 | DMR_37   | 6   | 46293413 | F      | II   | RCAN2 | 1stExon | opensea | 1stExon-opensea |
| cg06665622 | cg06665622 | DMR_37   | 6   | 46293571 | F      | II   | RCAN2 | TSS200  | opensea | TSS200-opensea  |
| cg00782811 | cg00782811 | DMR_37   | 6   | 46293734 | F      | II   | RCAN2 | TSS1500 | opensea | TSS1500-opensea |
| cg19083007 | cg19083007 | DMR_37   | 6   | 46293862 | R      | II   | RCAN2 | TSS1500 | opensea | TSS1500-opensea |
| cg05412882 | cg05412882 | DMR_37   | 6   | 46294074 | F      | II   | RCAN2 | TSS1500 | opensea | TSS1500-opensea |
| cg04652496 | cg04652496 | DMR_37   | 6   | 46294097 | F      | II   | RCAN2 | TSS1500 | opensea | TSS1500-opensea |
| cg02242527 | cg02242527 | DMR_37   | 6   | 46294138 | R      | II   | RCAN2 | TSS1500 | opensea | TSS1500-opensea |

Showing 1 to 8 of 8 entries

Previous  Next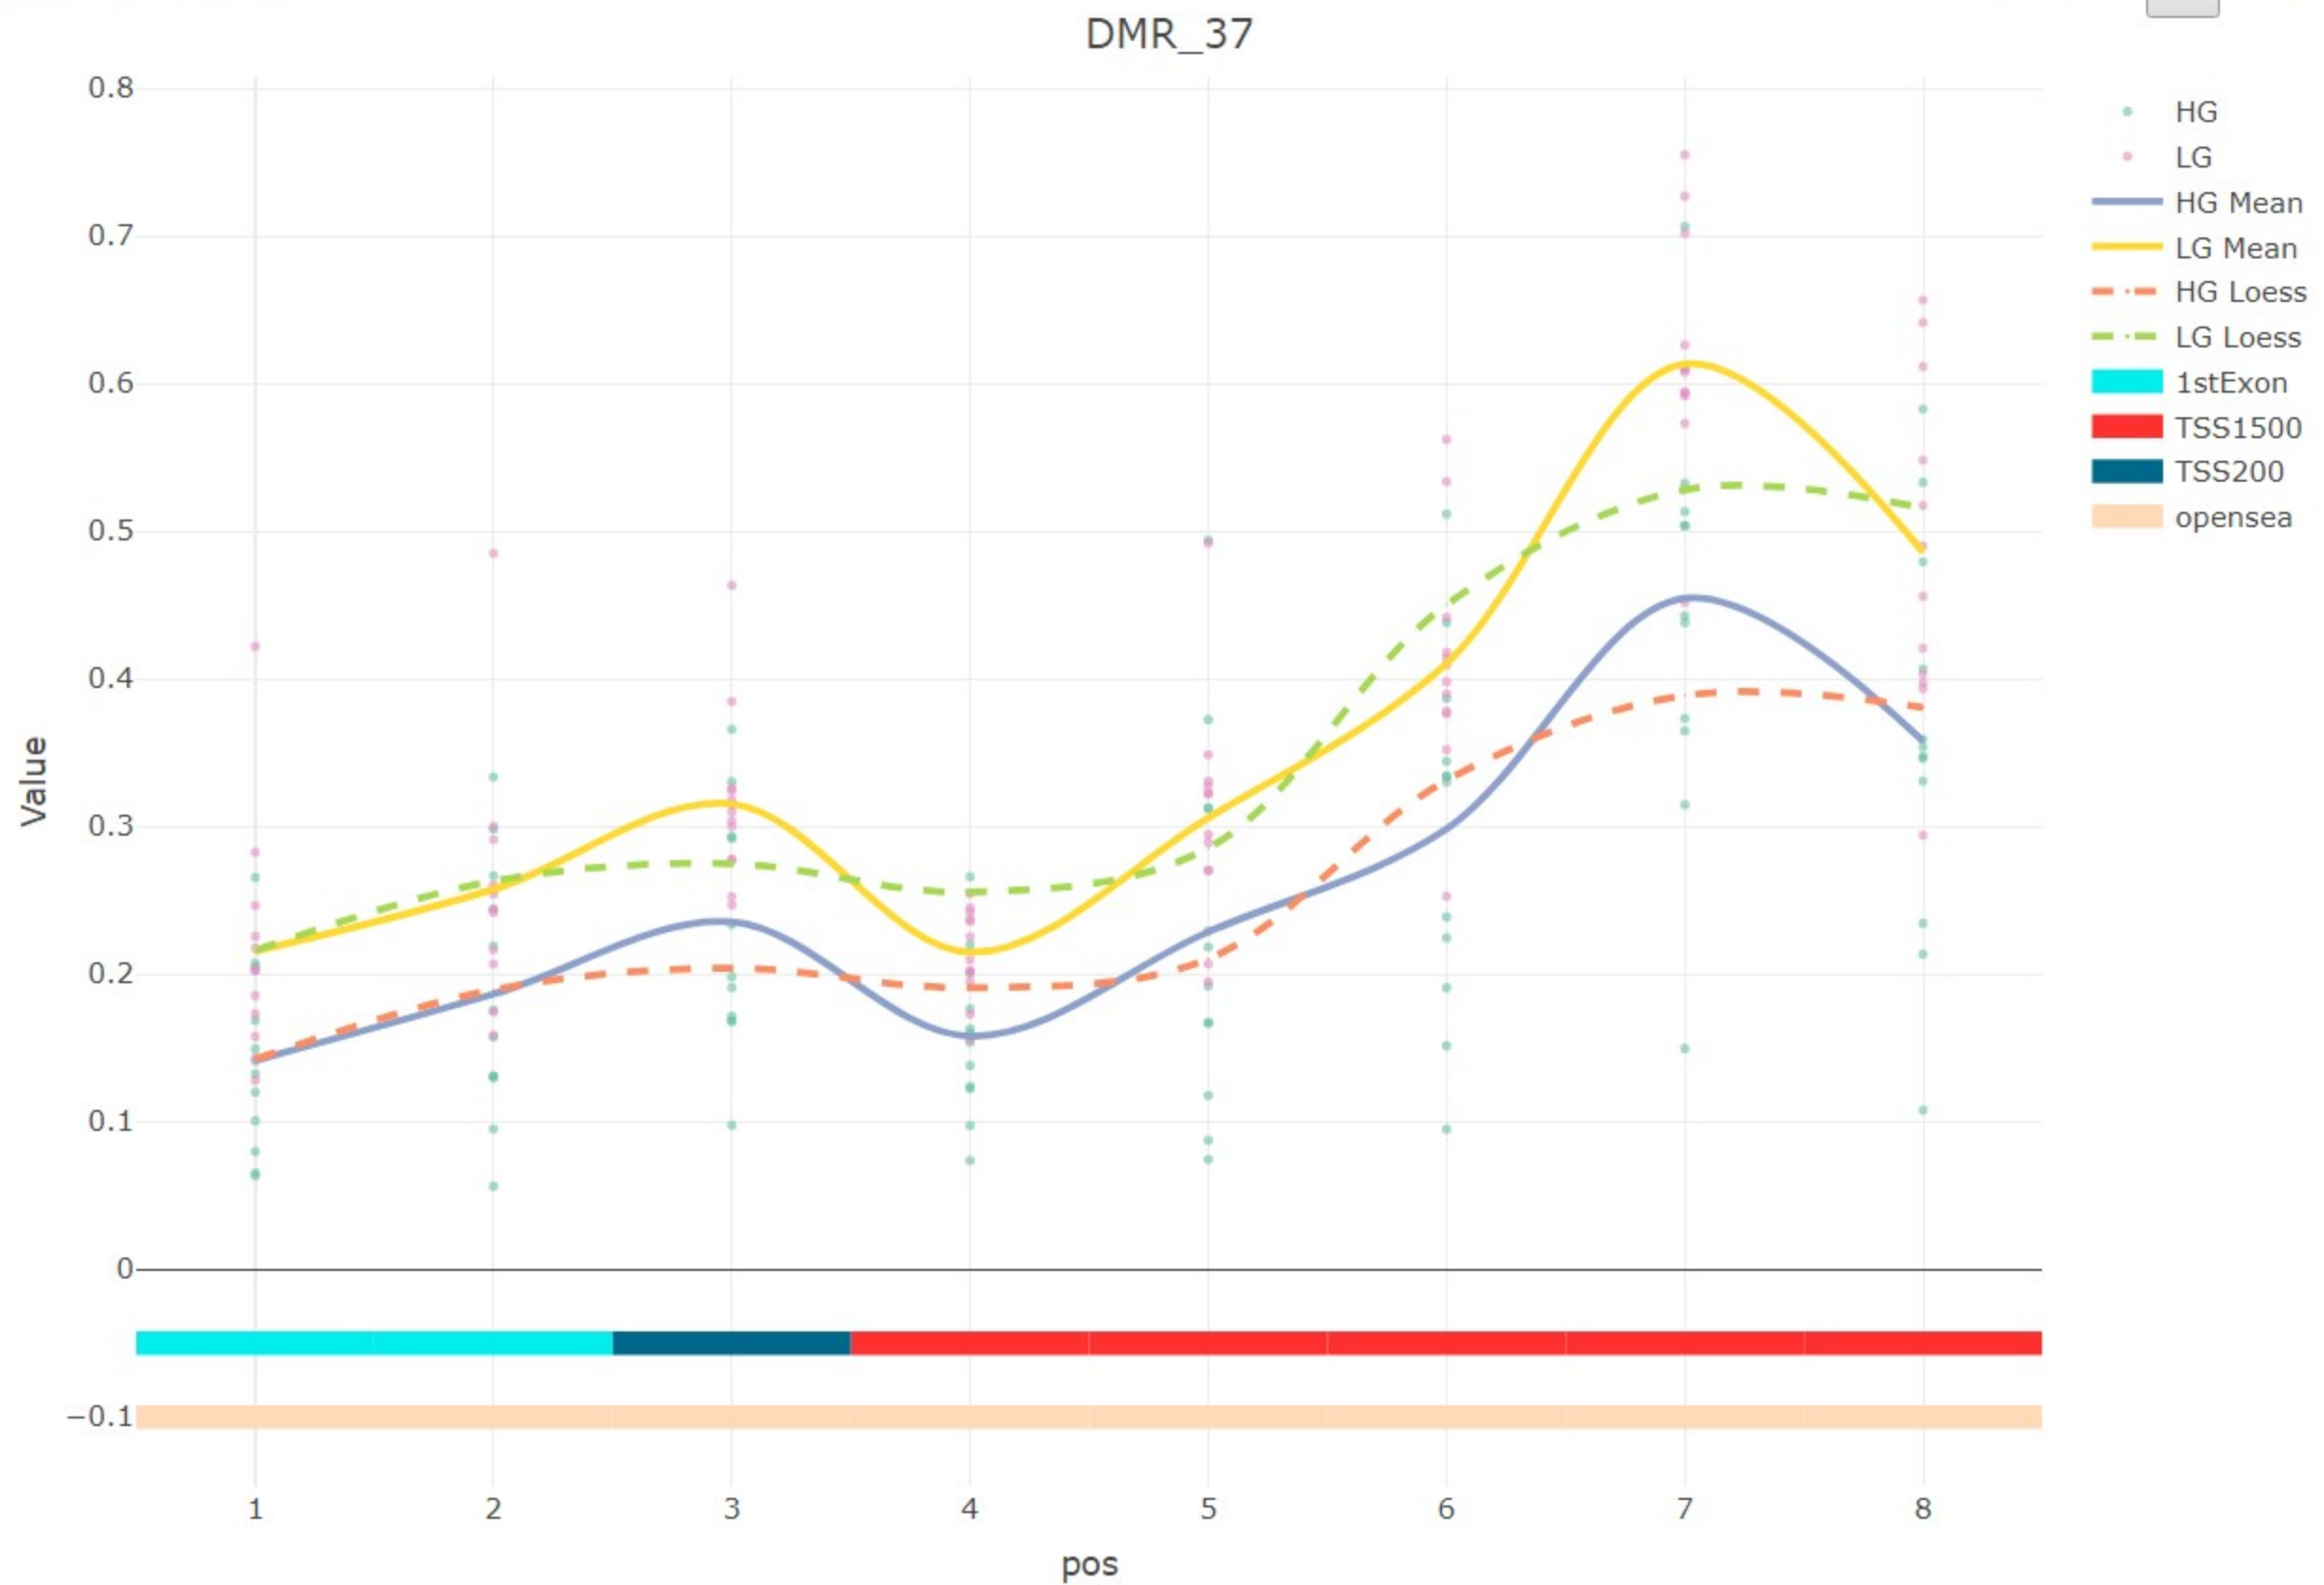

Show 8 entries

Search: 

| ID         | DMRindex   | CHR    | MAPINFO | Strand   | Type | gene | feature | cgi     | feat.cgi |                 |
|------------|------------|--------|---------|----------|------|------|---------|---------|----------|-----------------|
| cg19209895 | cg19209895 | DMR_44 | 10      | 86004281 | F    | II   | RGR     | TSS1500 | opensea  | TSS1500-opensea |
| cg15780078 | cg15780078 | DMR_44 | 10      | 86004395 | R    | II   | RGR     | TSS1500 | opensea  | TSS1500-opensea |
| cg02101307 | cg02101307 | DMR_44 | 10      | 86004424 | F    | II   | RGR     | TSS1500 | opensea  | TSS1500-opensea |
| cg13133883 | cg13133883 | DMR_44 | 10      | 86004660 | R    | II   | RGR     | TSS200  | opensea  | TSS200-opensea  |
| cg19009417 | cg19009417 | DMR_44 | 10      | 86004704 | F    | II   | RGR     | TSS200  | opensea  | TSS200-opensea  |
| cg00415971 | cg00415971 | DMR_44 | 10      | 86004761 | R    | II   | RGR     | TSS200  | opensea  | TSS200-opensea  |
| cg06705986 | cg06705986 | DMR_44 | 10      | 86004888 | R    | II   | RGR     | 1stExon | opensea  | 1stExon-opensea |
| cg24660086 | cg24660086 | DMR_44 | 10      | 86005121 | R    | II   | RGR     | Body    | opensea  | Body-opensea    |

Showing 1 to 8 of 8 entries

Previous  Next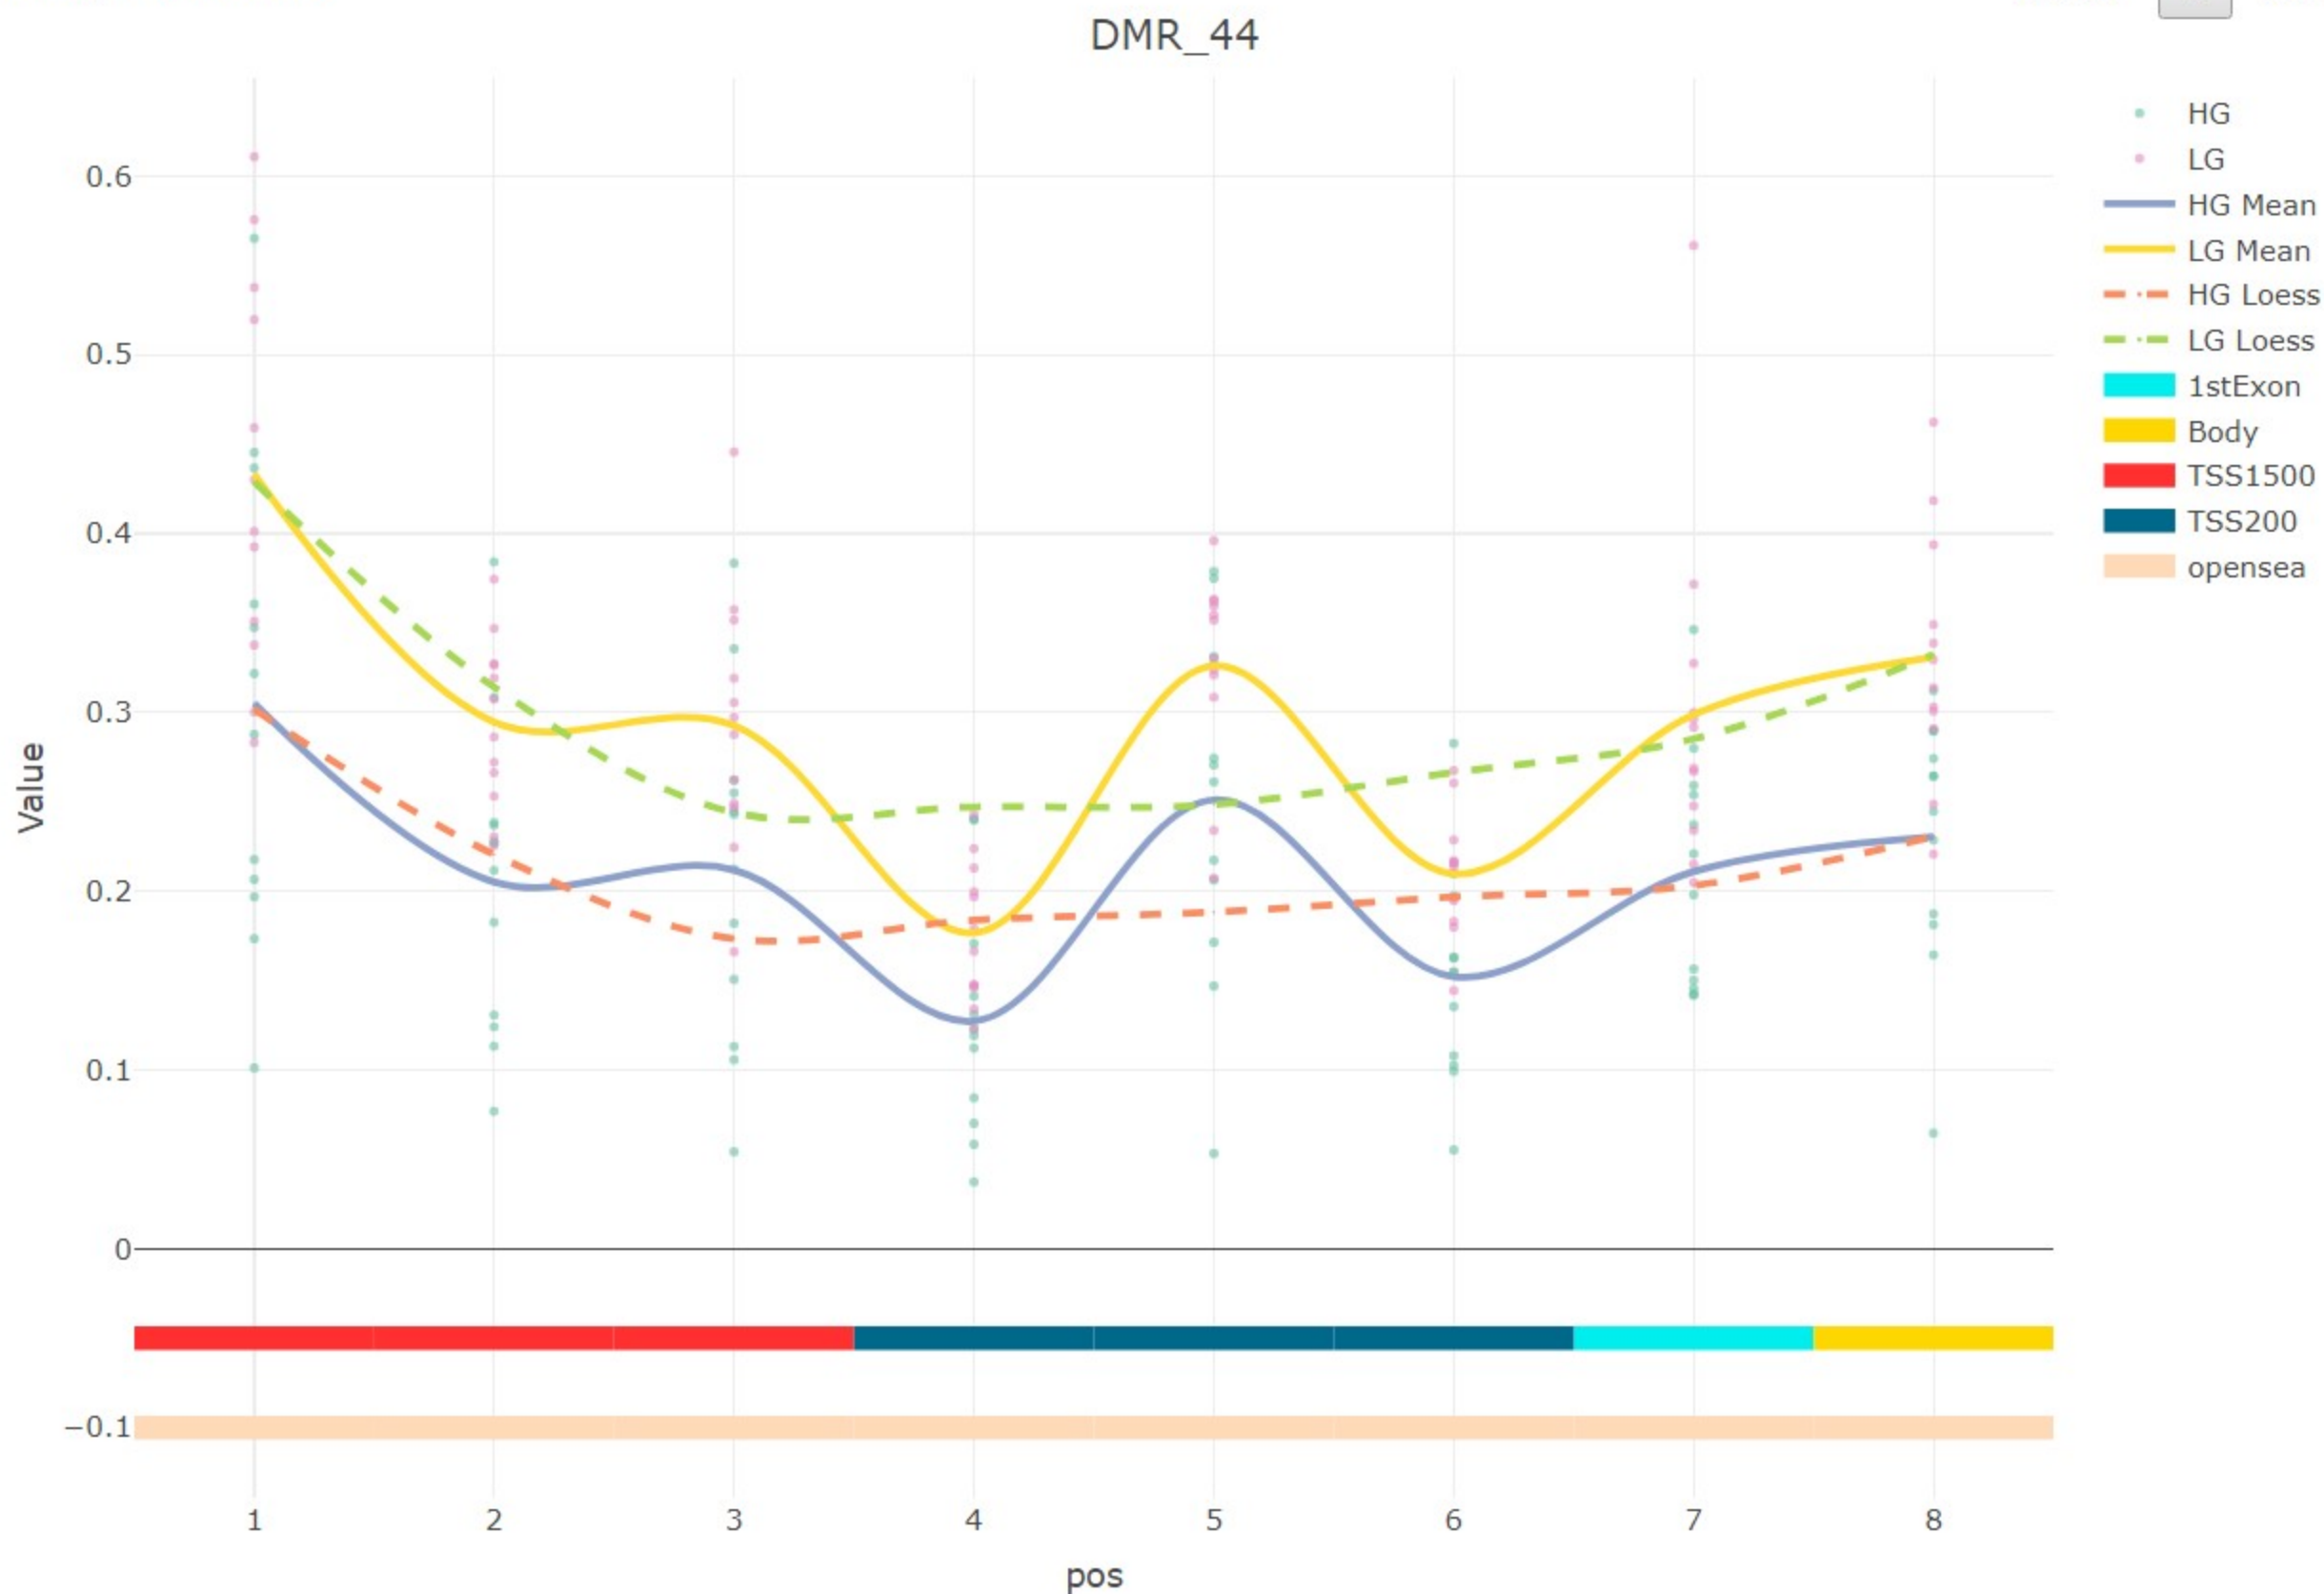

Show 8 entries

Search: 

| ID         | DMRindex   | CHR    | MAPINFO | Strand    | Type | gene | feature | cgi    | feat.cgi |                |
|------------|------------|--------|---------|-----------|------|------|---------|--------|----------|----------------|
| cg27400205 | cg27400205 | DMR_25 | 3       | 159557493 | F    | II   | SCHIP1  | TSS200 | opensea  | TSS200-opensea |
| cg25705519 | cg25705519 | DMR_25 | 3       | 159557552 | R    | II   | SCHIP1  | Body   | opensea  | Body-opensea   |
| cg09345606 | cg09345606 | DMR_25 | 3       | 159557567 | F    | II   | SCHIP1  | TSS200 | opensea  | TSS200-opensea |
| cg00188627 | cg00188627 | DMR_25 | 3       | 159557779 | R    | II   | SCHIP1  | Body   | opensea  | Body-opensea   |
| cg15180789 | cg15180789 | DMR_25 | 3       | 159557797 | F    | II   | SCHIP1  | Body   | opensea  | Body-opensea   |
| cg10088405 | cg10088405 | DMR_25 | 3       | 159557817 | F    | II   | SCHIP1  | 5'UTR  | opensea  | 5'UTR-opensea  |
| cg23553912 | cg23553912 | DMR_25 | 3       | 159558031 | R    | II   | SCHIP1  | Body   | opensea  | Body-opensea   |
| cg13447038 | cg13447038 | DMR_25 | 3       | 159558254 | F    | II   | SCHIP1  | Body   | opensea  | Body-opensea   |

Showing 1 to 8 of 8 entries

Previous  Next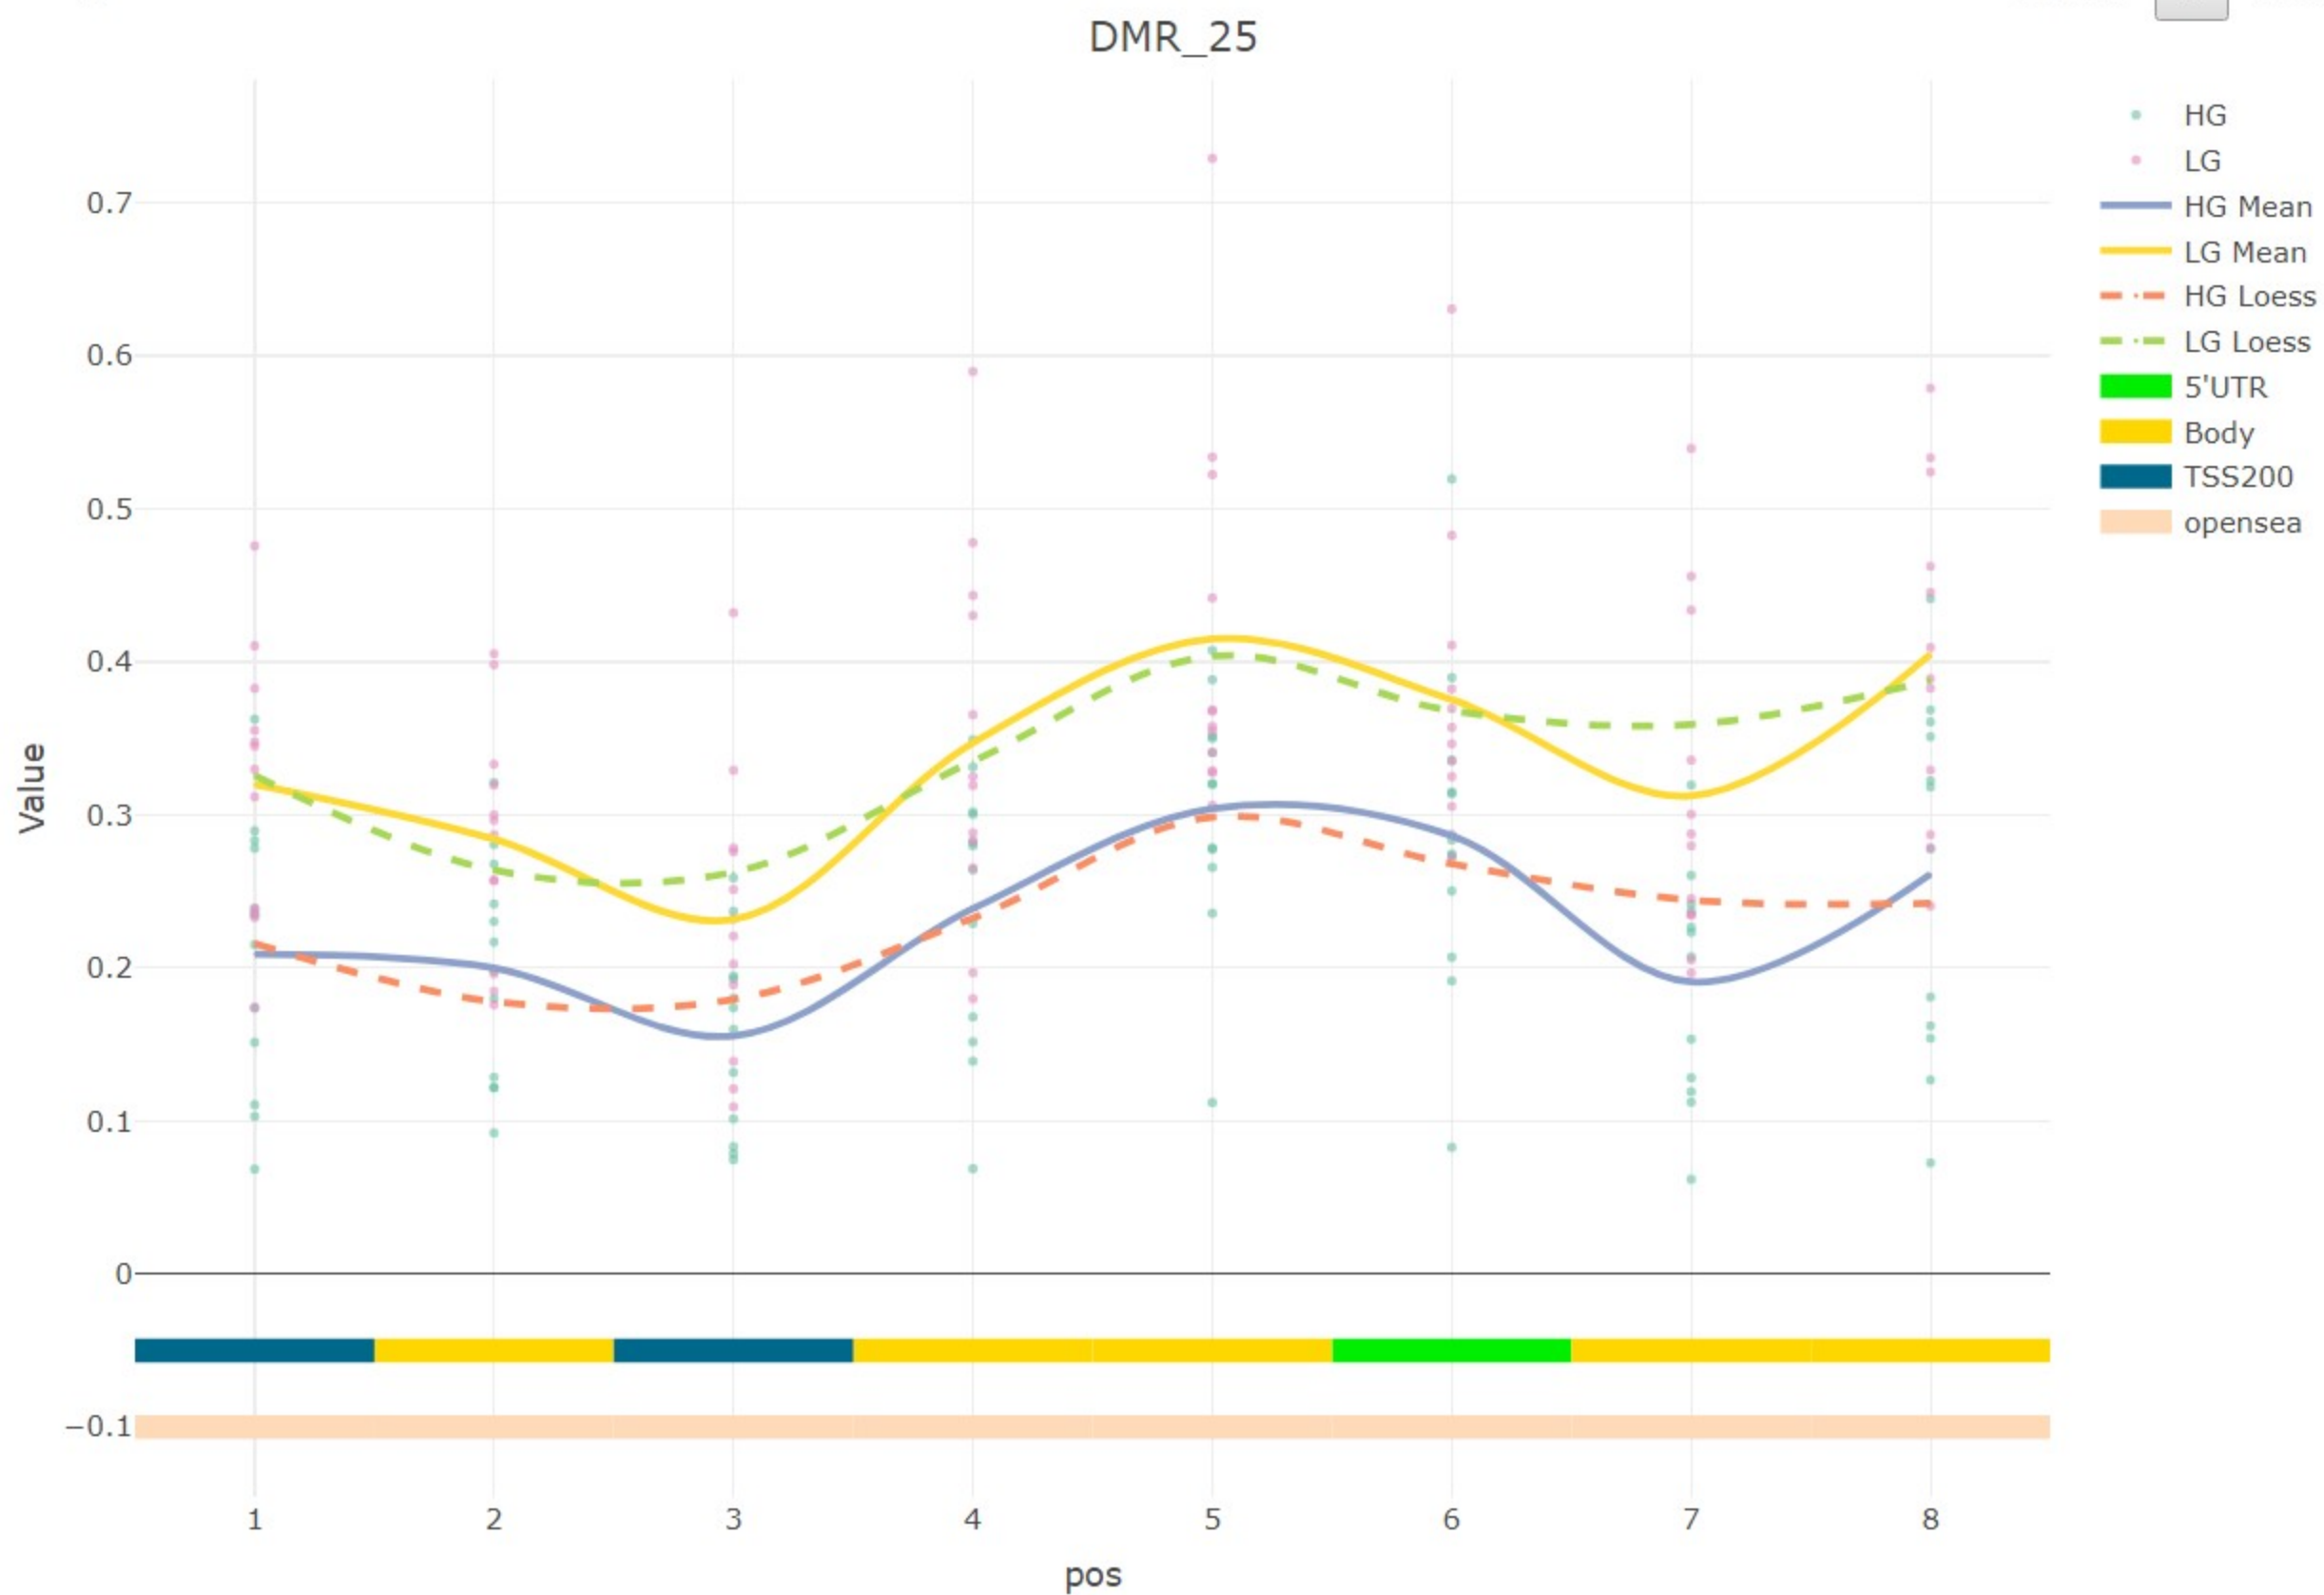

Show **8** entriesSearch: 

| ID         | DMRindex   | CHR    | MAPINFO | Strand   | Type | gene | feature | cgi  | feat.cgi |             |
|------------|------------|--------|---------|----------|------|------|---------|------|----------|-------------|
| cg04404381 | cg04404381 | DMR_20 | 11      | 70563580 | R    | II   | SHANK2  | Body | shore    | Body-shore  |
| cg08718050 | cg08718050 | DMR_20 | 11      | 70563677 | F    | I    | SHANK2  | Body | island   | Body-island |
| cg26429499 | cg26429499 | DMR_20 | 11      | 70563792 | F    | I    | SHANK2  | Body | island   | Body-island |
| cg06088782 | cg06088782 | DMR_20 | 11      | 70563839 | R    | I    | SHANK2  | Body | island   | Body-island |
| cg00646241 | cg00646241 | DMR_20 | 11      | 70563878 | F    | II   | SHANK2  | Body | island   | Body-island |
| cg24737505 | cg24737505 | DMR_20 | 11      | 70564116 | R    | II   | SHANK2  | Body | shore    | Body-shore  |
| cg16706687 | cg16706687 | DMR_20 | 11      | 70564293 | F    | II   | SHANK2  | Body | shore    | Body-shore  |
| cg13080721 | cg13080721 | DMR_20 | 11      | 70564414 | R    | I    | SHANK2  | Body | shore    | Body-shore  |

Showing 1 to 8 of 8 entries

Previous **1** Next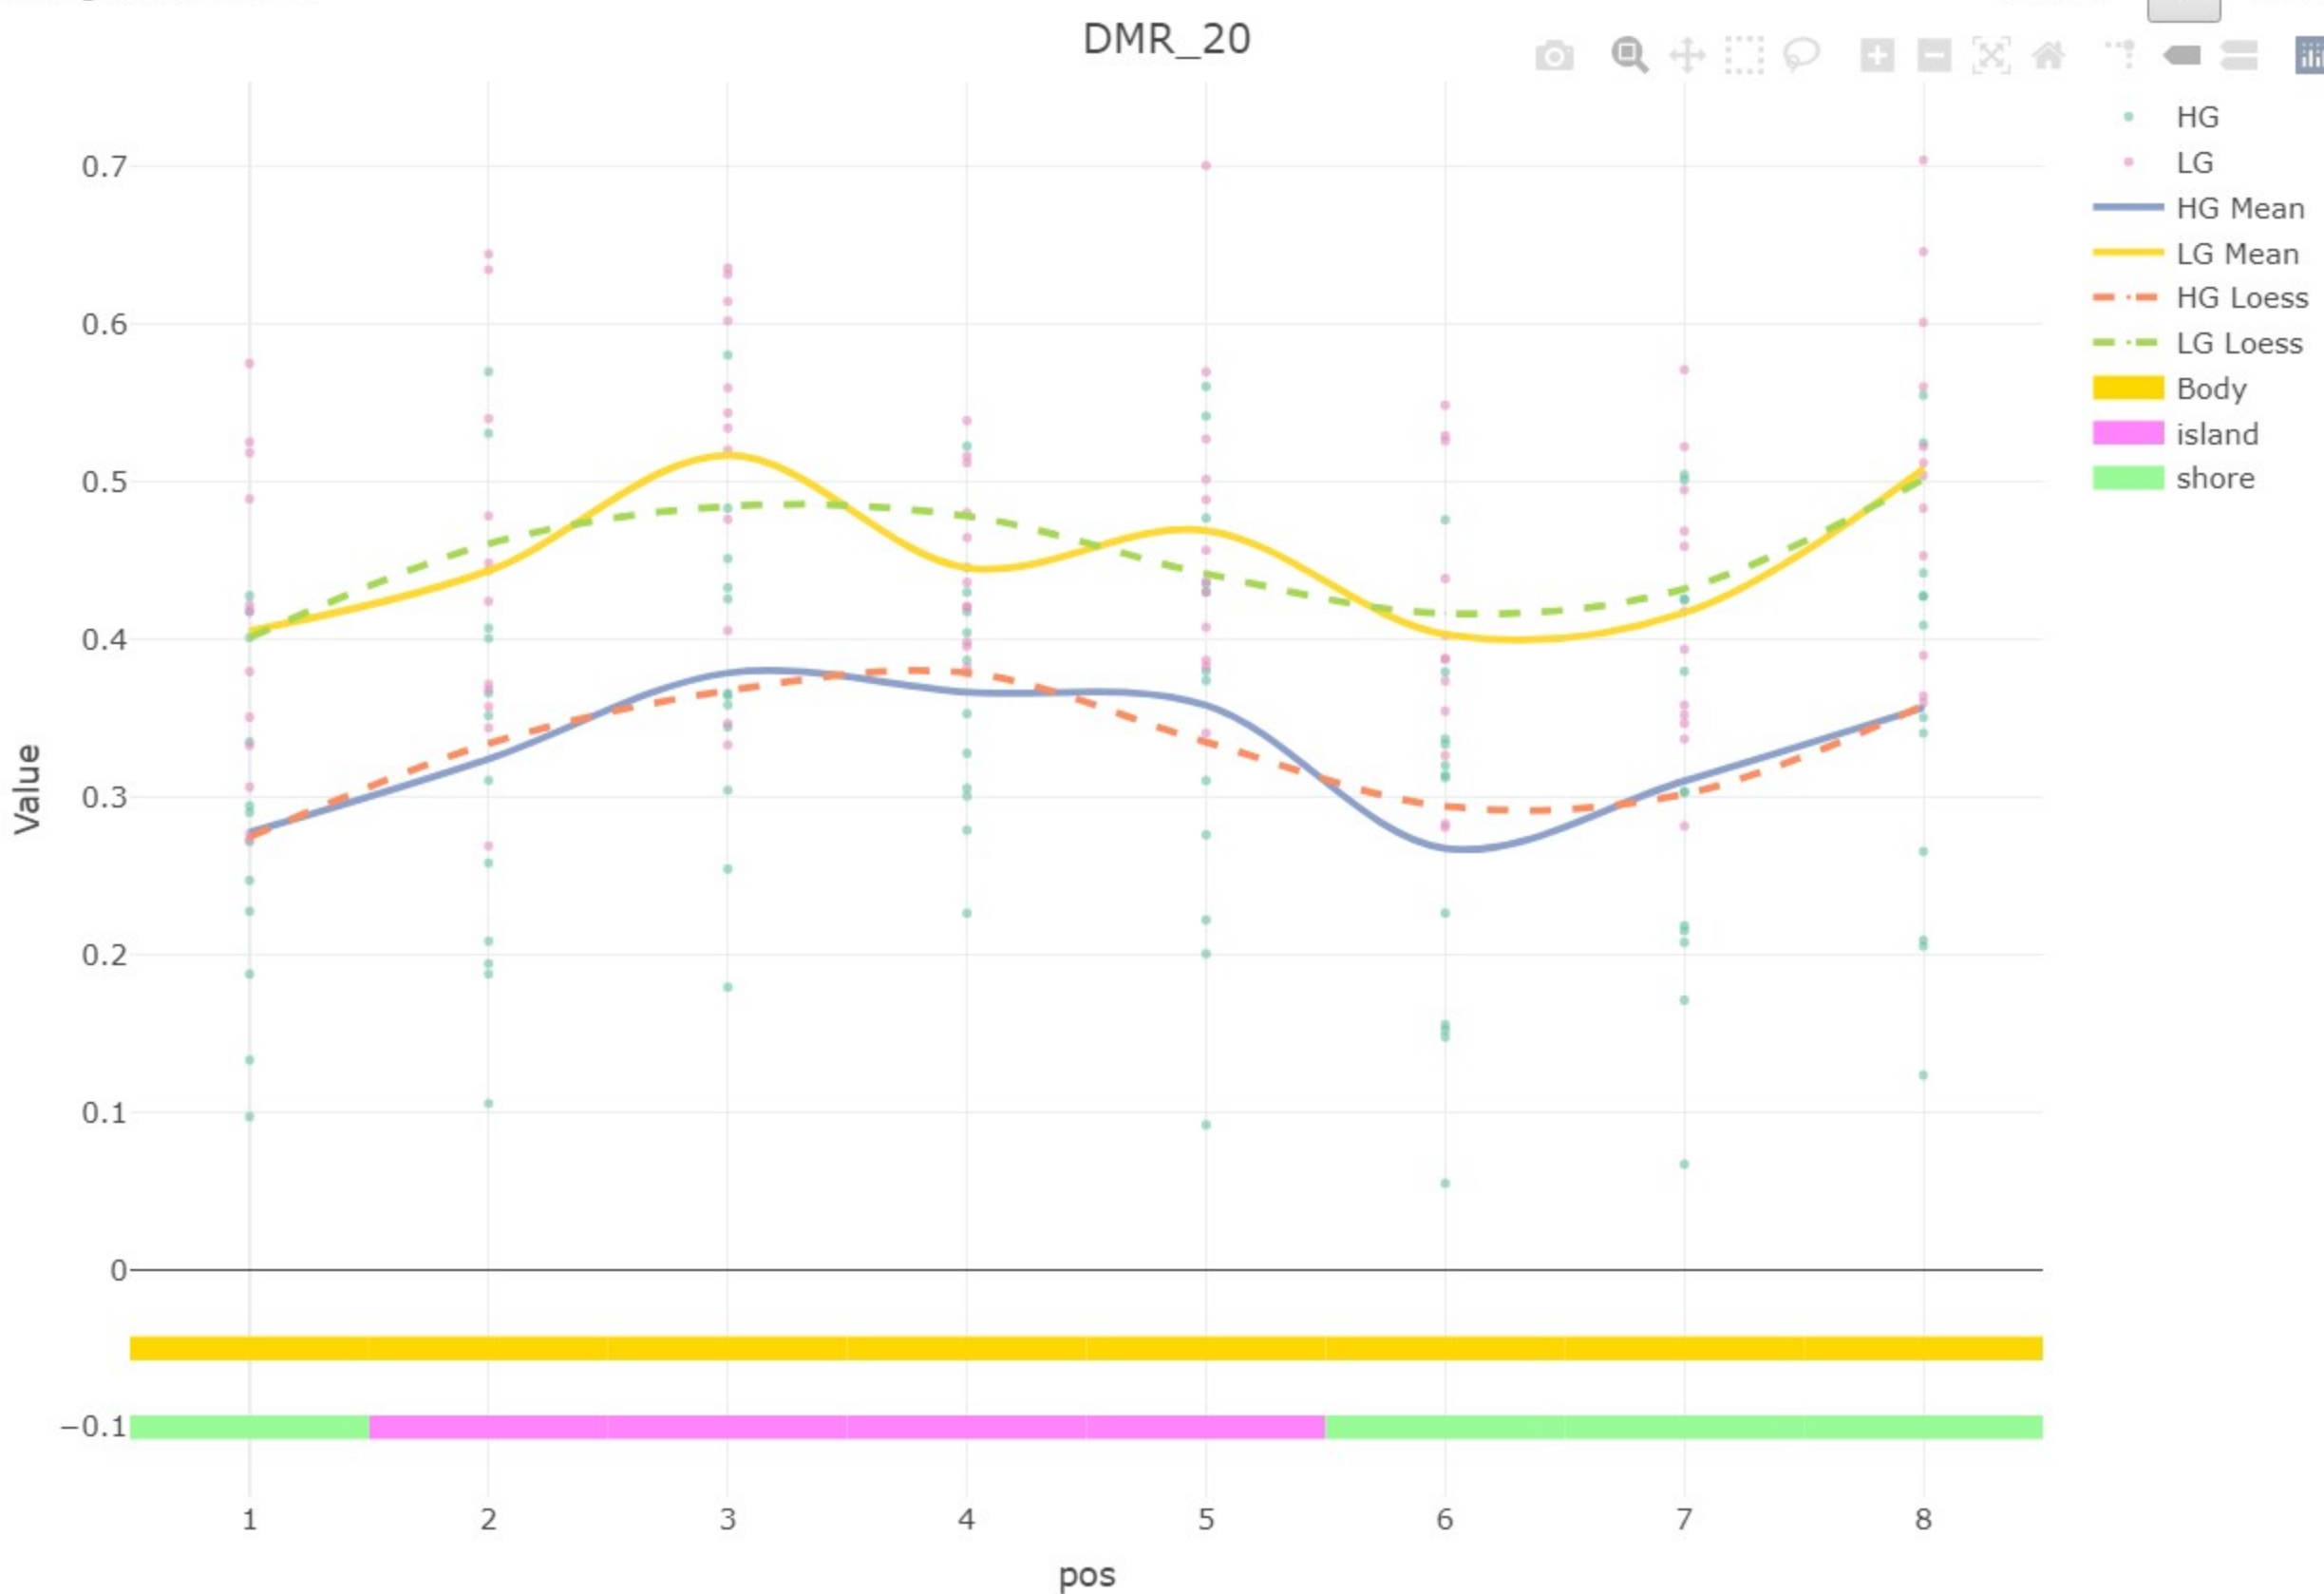

Show  entriesSearch: 

|            | ID         | DMRindex | CHR | MAPINFO   | Strand | Type | gene   | feature | cgi     | feat.cgi        |
|------------|------------|----------|-----|-----------|--------|------|--------|---------|---------|-----------------|
| cg04392082 | cg04392082 | DMR_12   | 4   | 186732926 | F      | I    | SORBS2 | 5'UTR   | opensea | 5'UTR-opensea   |
| cg02790305 | cg02790305 | DMR_12   | 4   | 186732932 | F      | II   | SORBS2 | 5'UTR   | opensea | 5'UTR-opensea   |
| cg26785346 | cg26785346 | DMR_12   | 4   | 186732936 | R      | II   | SORBS2 | 5'UTR   | opensea | 5'UTR-opensea   |
| cg01933073 | cg01933073 | DMR_12   | 4   | 186732942 | F      | II   | SORBS2 | 5'UTR   | opensea | 5'UTR-opensea   |
| cg18342119 | cg18342119 | DMR_12   | 4   | 186733011 | F      | II   | SORBS2 | TSS1500 | opensea | TSS1500-opensea |
| cg13921444 | cg13921444 | DMR_12   | 4   | 186733024 | F      | II   | SORBS2 | 5'UTR   | opensea | 5'UTR-opensea   |
| cg04348265 | cg04348265 | DMR_12   | 4   | 186733060 | F      | II   | SORBS2 | 5'UTR   | opensea | 5'UTR-opensea   |
| cg12066473 | cg12066473 | DMR_12   | 4   | 186733331 | F      | II   | SORBS2 | 5'UTR   | opensea | 5'UTR-opensea   |
| cg18566313 | cg18566313 | DMR_12   | 4   | 186733428 | R      | II   | SORBS2 | TSS200  | opensea | TSS200-opensea  |
| cg27262015 | cg27262015 | DMR_12   | 4   | 186733590 | R      | II   | SORBS2 | TSS1500 | opensea | TSS1500-opensea |

Showing 1 to 10 of 10 entries

Previous  Next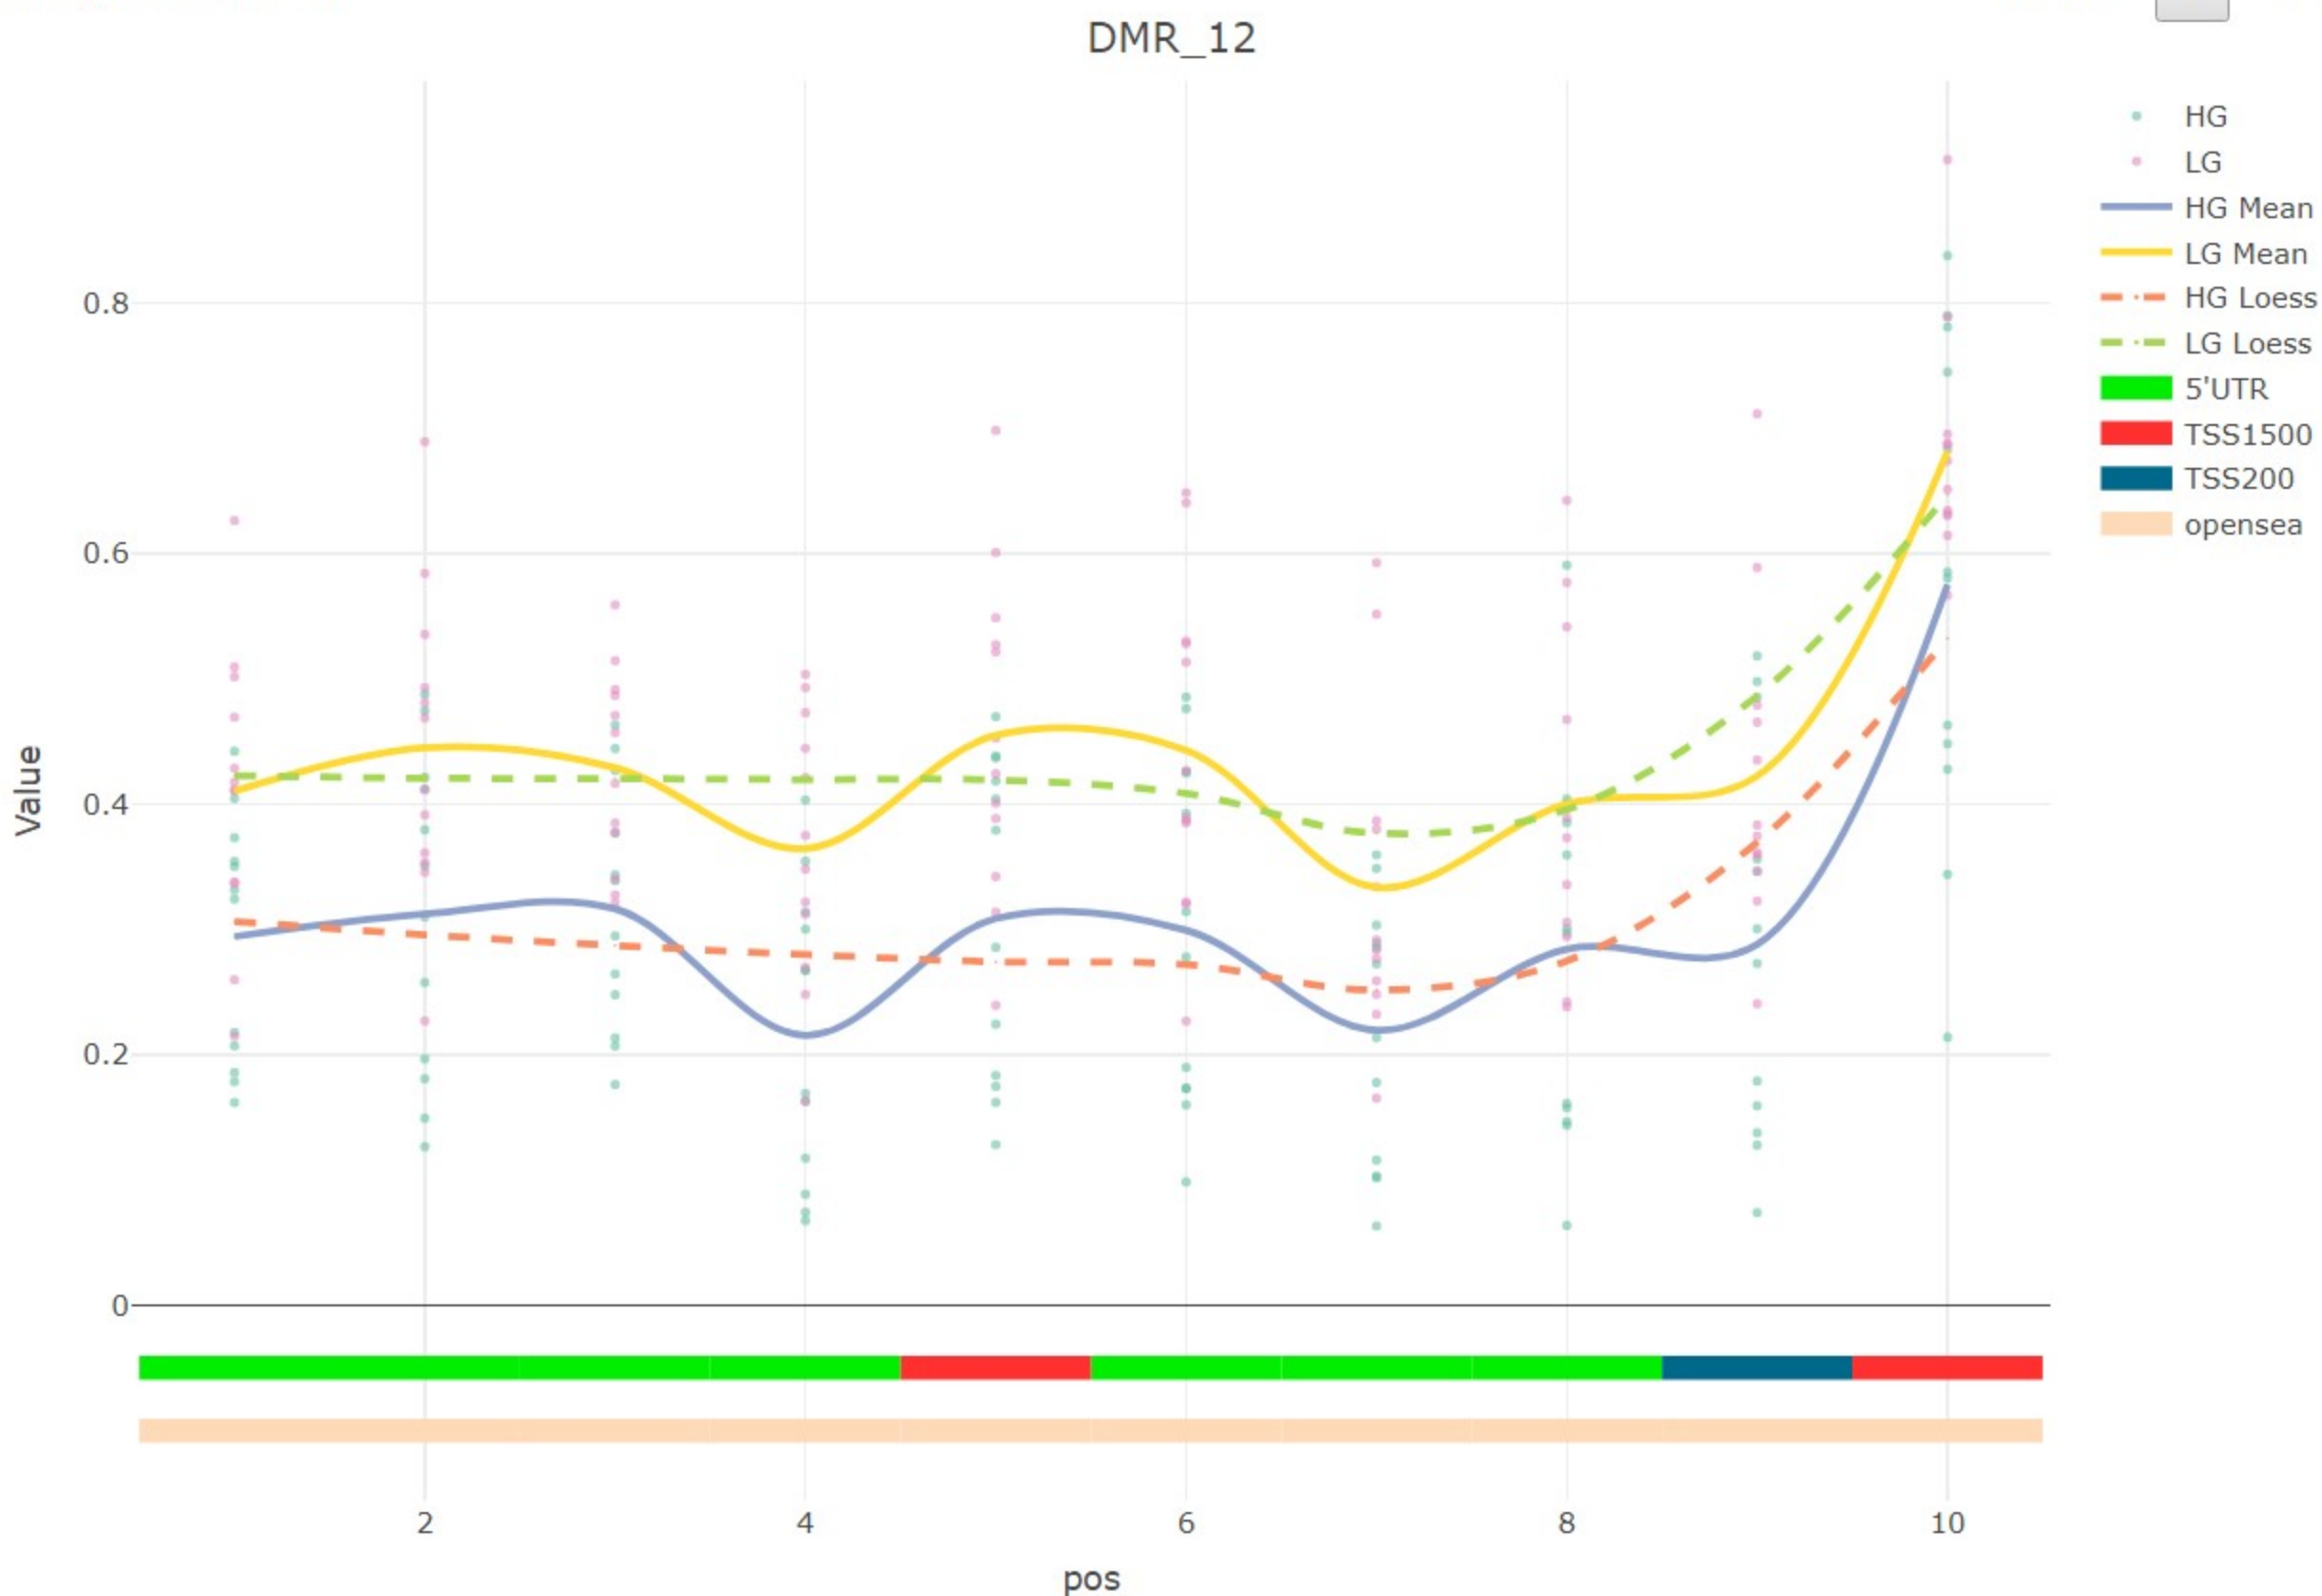

Show  entriesSearch: 

|            | ID         | DMRindex | CHR | MAPINFO  | Strand | Type | gene  | feature | cgi    | feat.cgi    |
|------------|------------|----------|-----|----------|--------|------|-------|---------|--------|-------------|
| cg04446568 | cg04446568 | DMR_22   | 1   | 54723075 | R      | II   | SSBP3 | Body    | shore  | Body-shore  |
| cg22537280 | cg22537280 | DMR_22   | 1   | 54723213 | F      | II   | SSBP3 | Body    | shore  | Body-shore  |
| cg20568390 | cg20568390 | DMR_22   | 1   | 54723340 | F      | II   | SSBP3 | Body    | shore  | Body-shore  |
| cg00838829 | cg00838829 | DMR_22   | 1   | 54723426 | F      | II   | SSBP3 | Body    | shore  | Body-shore  |
| cg17836913 | cg17836913 | DMR_22   | 1   | 54723679 | R      | II   | SSBP3 | Body    | shore  | Body-shore  |
| cg24672056 | cg24672056 | DMR_22   | 1   | 54723730 | F      | I    | SSBP3 | Body    | island | Body-island |

Showing 1 to 6 of 6 entries

Previous  Next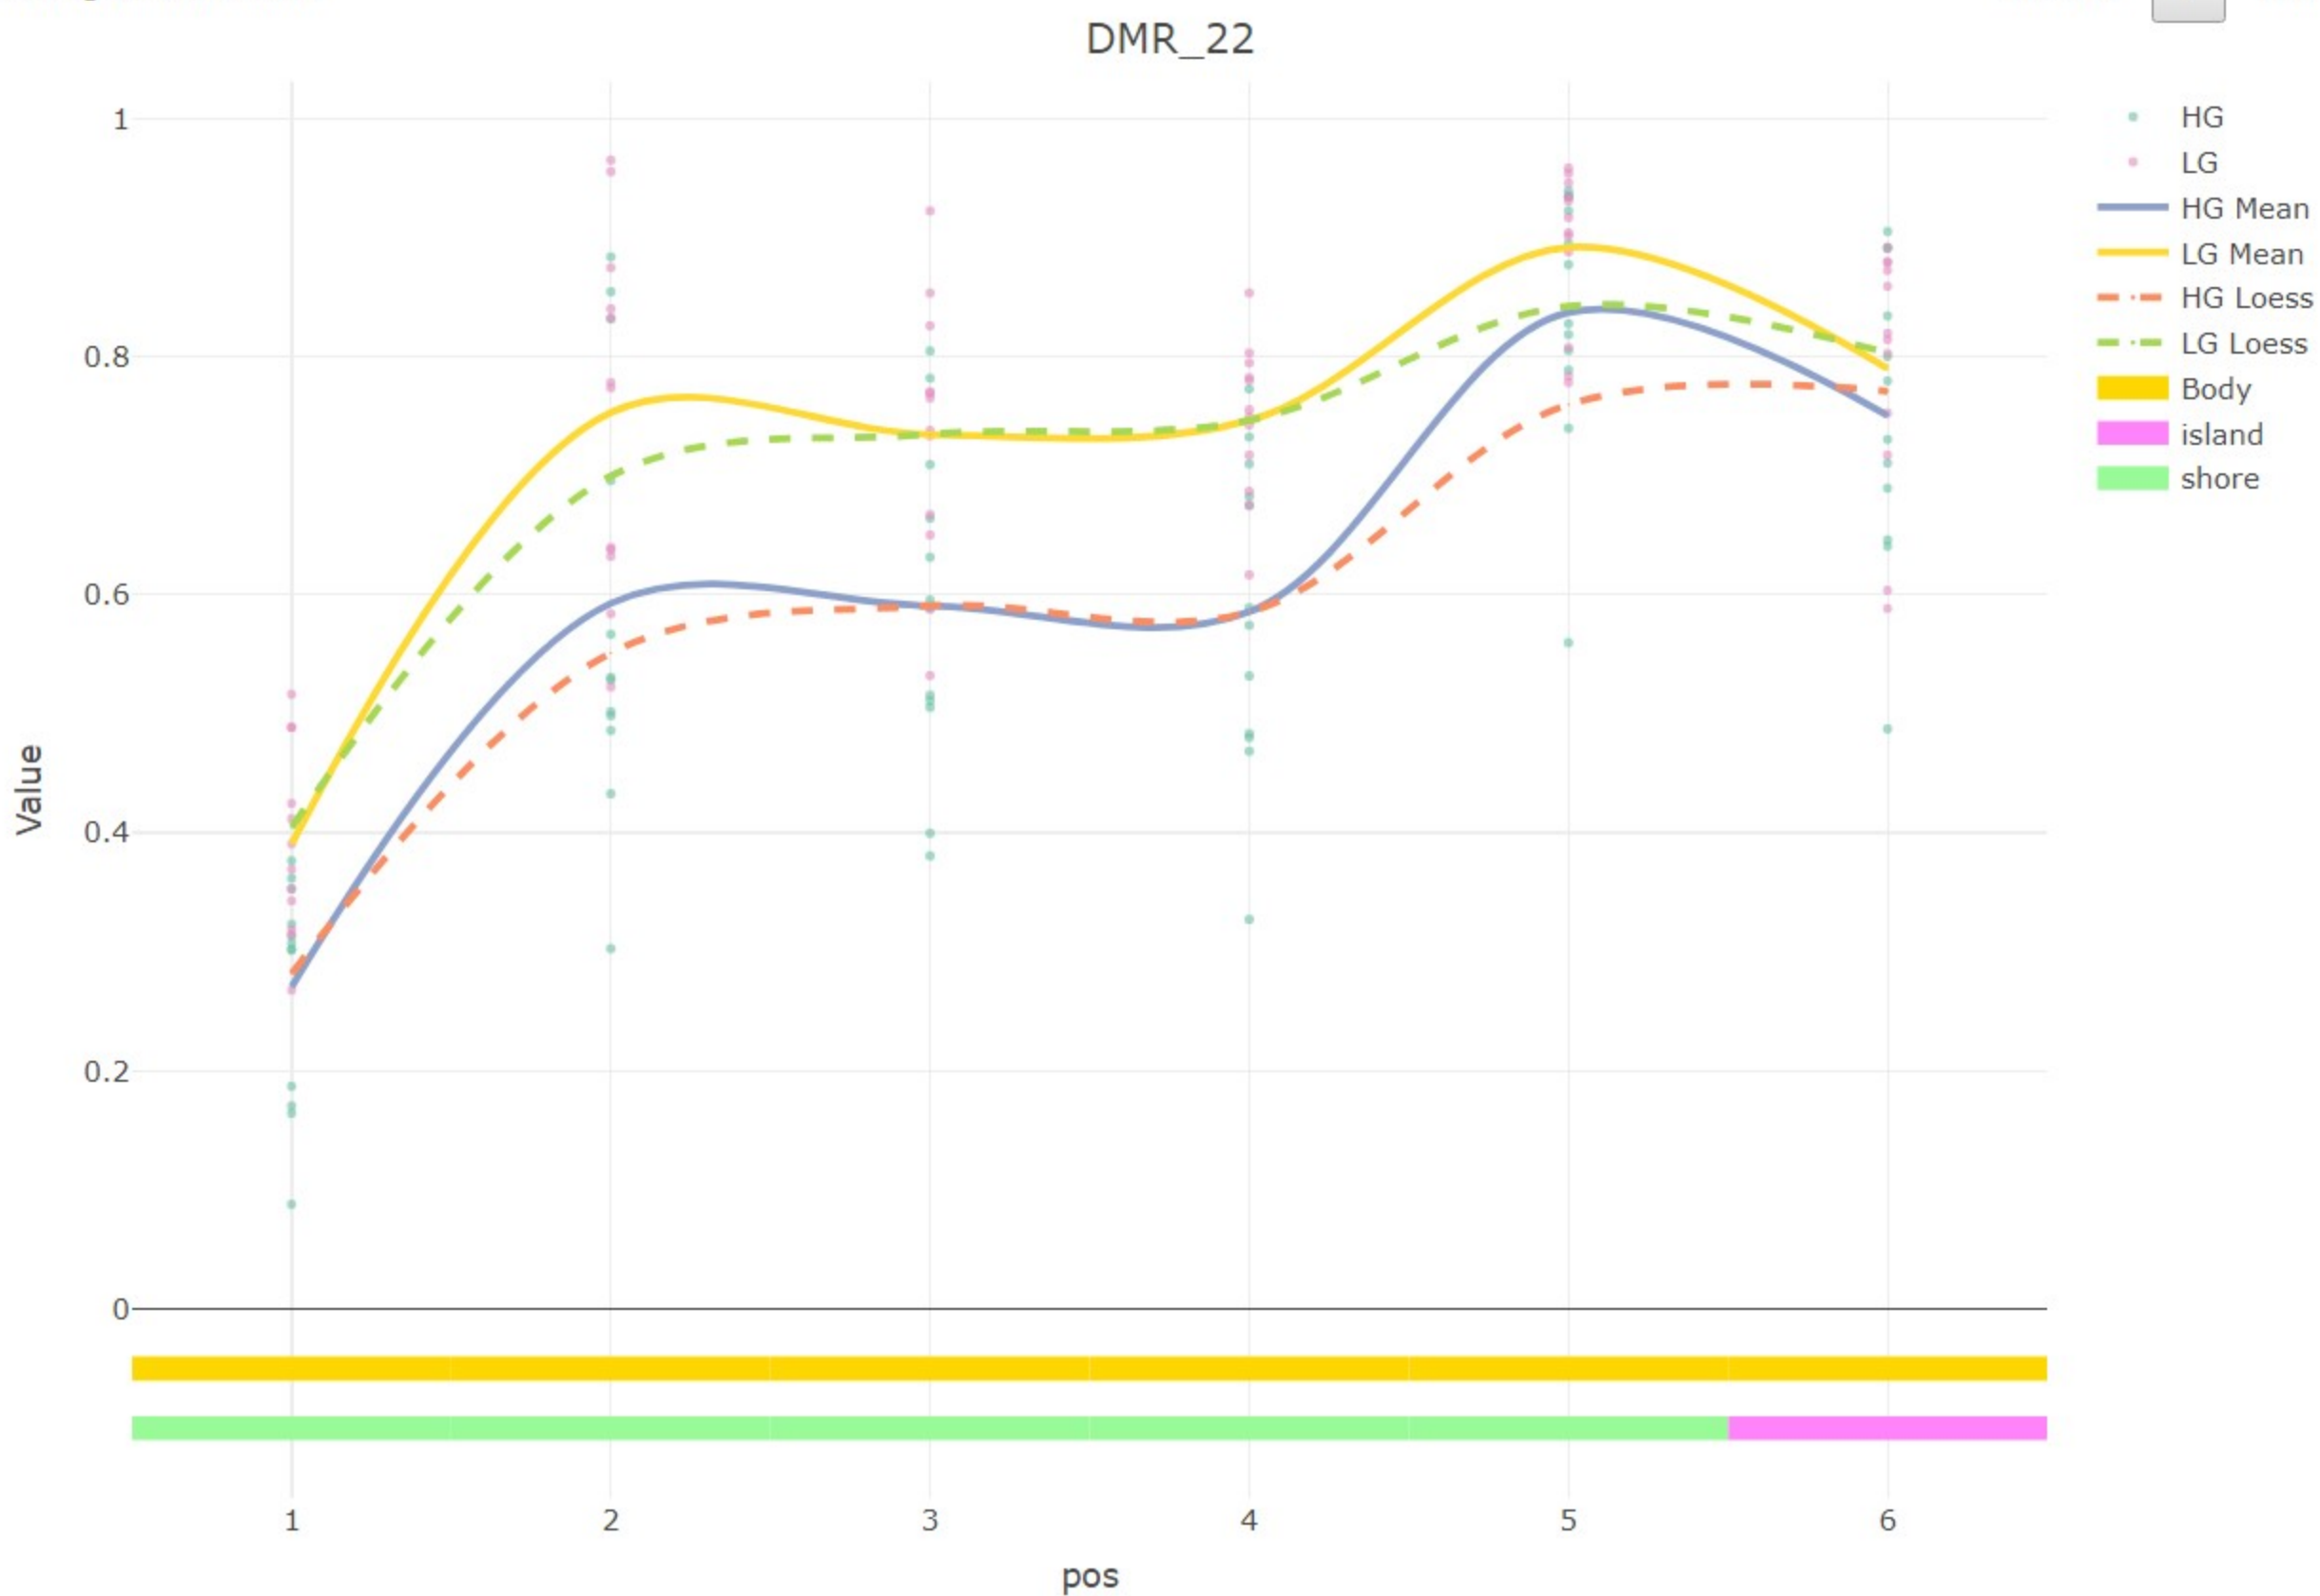



Show  entriesSearch: 

| ID         | DMRindex   | CHR    | MAPINFO | Strand   | Type | gene | feature | cgi    | feat.cgi |              |
|------------|------------|--------|---------|----------|------|------|---------|--------|----------|--------------|
| cg03296204 | cg03296204 | DMR_11 | 17      | 77923971 | R    | II   | TBC1D16 | Body   | shore    | Body-shore   |
| cg17367884 | cg17367884 | DMR_11 | 17      | 77924180 | F    | I    | TBC1D16 | Body   | island   | Body-island  |
| cg01084215 | cg01084215 | DMR_11 | 17      | 77924269 | R    | II   | TBC1D16 | Body   | island   | Body-island  |
| cg14505694 | cg14505694 | DMR_11 | 17      | 77924275 | R    | II   | TBC1D16 | Body   | island   | Body-island  |
| cg18749563 | cg18749563 | DMR_11 | 17      | 77924371 | R    | I    | TBC1D16 | Body   | island   | Body-island  |
| cg07618085 | cg07618085 | DMR_11 | 17      | 77924582 | R    | II   | TBC1D16 | Body   | shore    | Body-shore   |
| cg17295878 | cg17295878 | DMR_11 | 17      | 77924665 | F    | I    | TBC1D16 | Body   | shore    | Body-shore   |
| cg23651872 | cg23651872 | DMR_11 | 17      | 77924733 | R    | II   | TBC1D16 | Body   | shore    | Body-shore   |
| cg25798632 | cg25798632 | DMR_11 | 17      | 77924774 | R    | II   | TBC1D16 | TSS200 | shore    | TSS200-shore |

Showing 1 to 9 of 9 entries

Previous  Next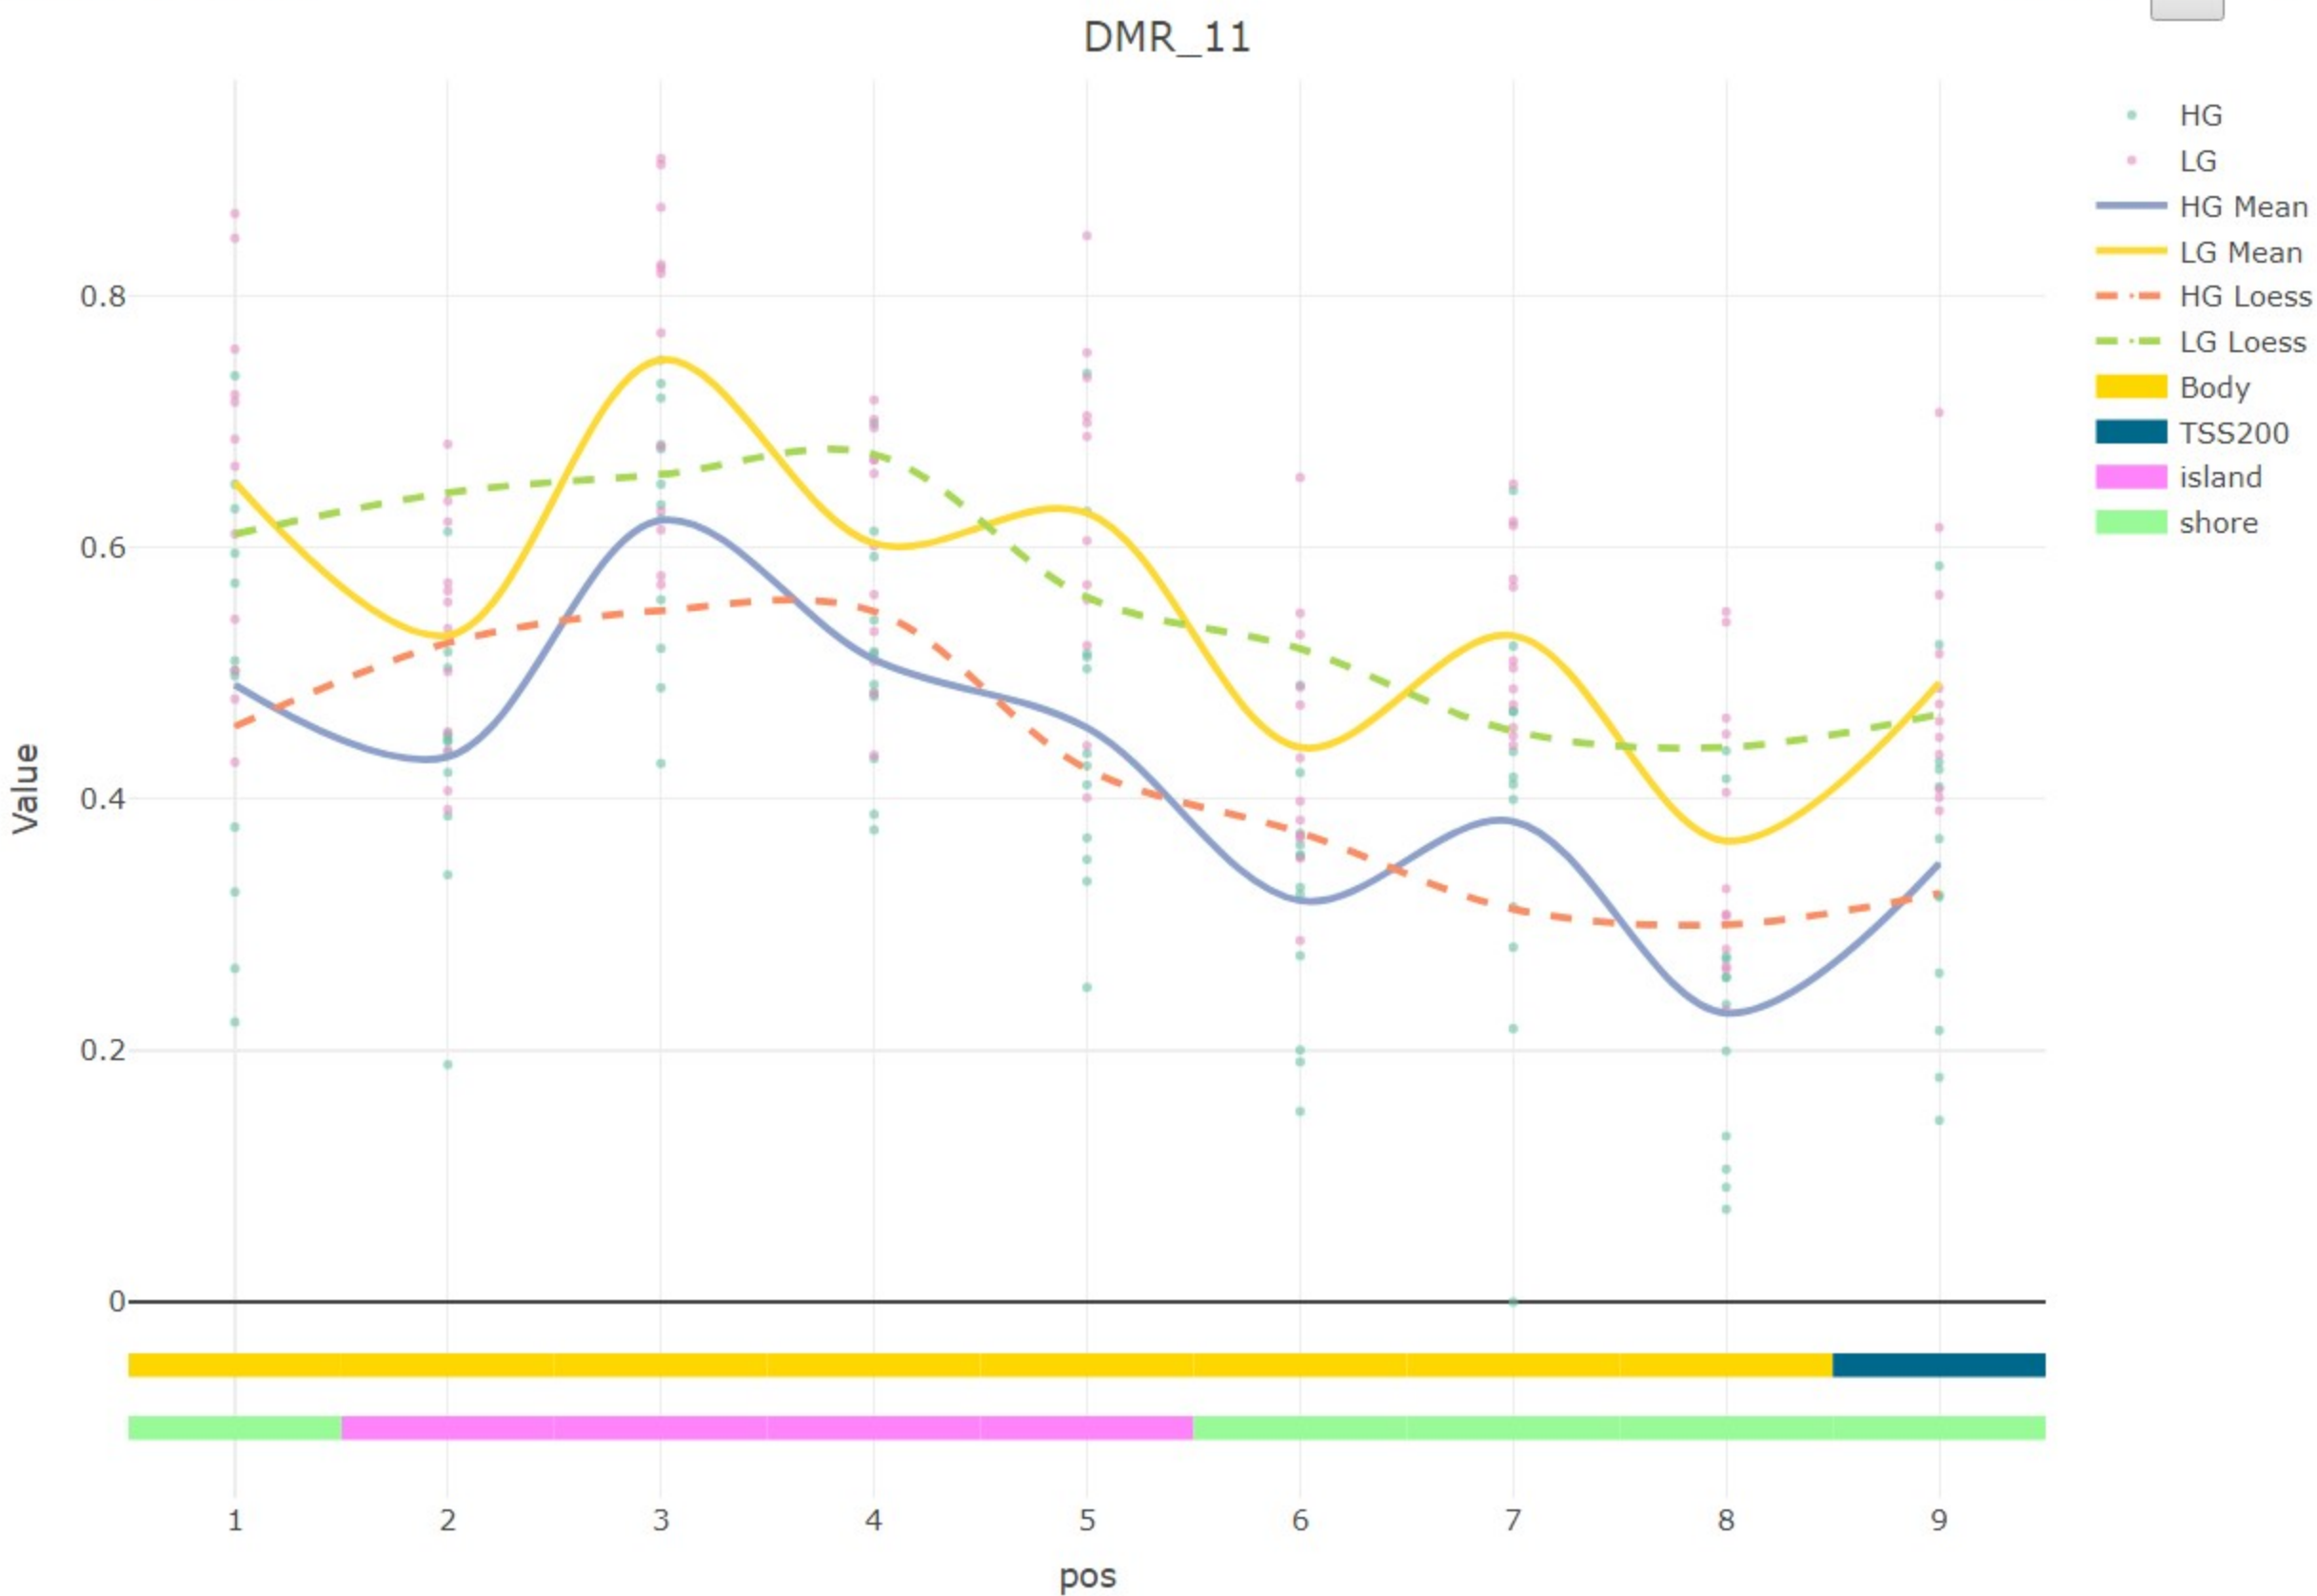

Show  entriesSearch: 

|  | ID         | DMRindex | CHR | MAPINFO   | Strand | Type | gene | feature | cgi     | feat.cgi        |
|--|------------|----------|-----|-----------|--------|------|------|---------|---------|-----------------|
|  | cg16814719 | DMR_19   | 8   | 134114834 | R      | II   | TG   | Body    | opensea | Body-opensea    |
|  | cg11155356 | DMR_19   | 8   | 134114892 | R      | II   | TG   | Body    | opensea | Body-opensea    |
|  | cg13396967 | DMR_19   | 8   | 134115055 | F      | II   | SLA  | 1stExon | opensea | 1stExon-opensea |
|  | cg01333535 | DMR_19   | 8   | 134115205 | F      | II   | SLA  | 1stExon | opensea | 1stExon-opensea |
|  | cg22226832 | DMR_19   | 8   | 134115210 | F      | II   | SLA  | 1stExon | opensea | 1stExon-opensea |
|  | cg02951514 | DMR_19   | 8   | 134115347 | R      | II   | TG   | Body    | opensea | Body-opensea    |
|  | cg17055993 | DMR_19   | 8   | 134115431 | F      | II   | TG   | Body    | opensea | Body-opensea    |
|  | cg08048527 | DMR_19   | 8   | 134115534 | F      | II   | SLA  | TSS1500 | opensea | TSS1500-opensea |
|  | cg01064758 | DMR_19   | 8   | 134115653 | F      | II   | TG   | Body    | opensea | Body-opensea    |
|  | cg03220363 | DMR_19   | 8   | 134115661 | F      | II   | TG   | Body    | opensea | Body-opensea    |

Showing 1 to 10 of 10 entries

Previous  Next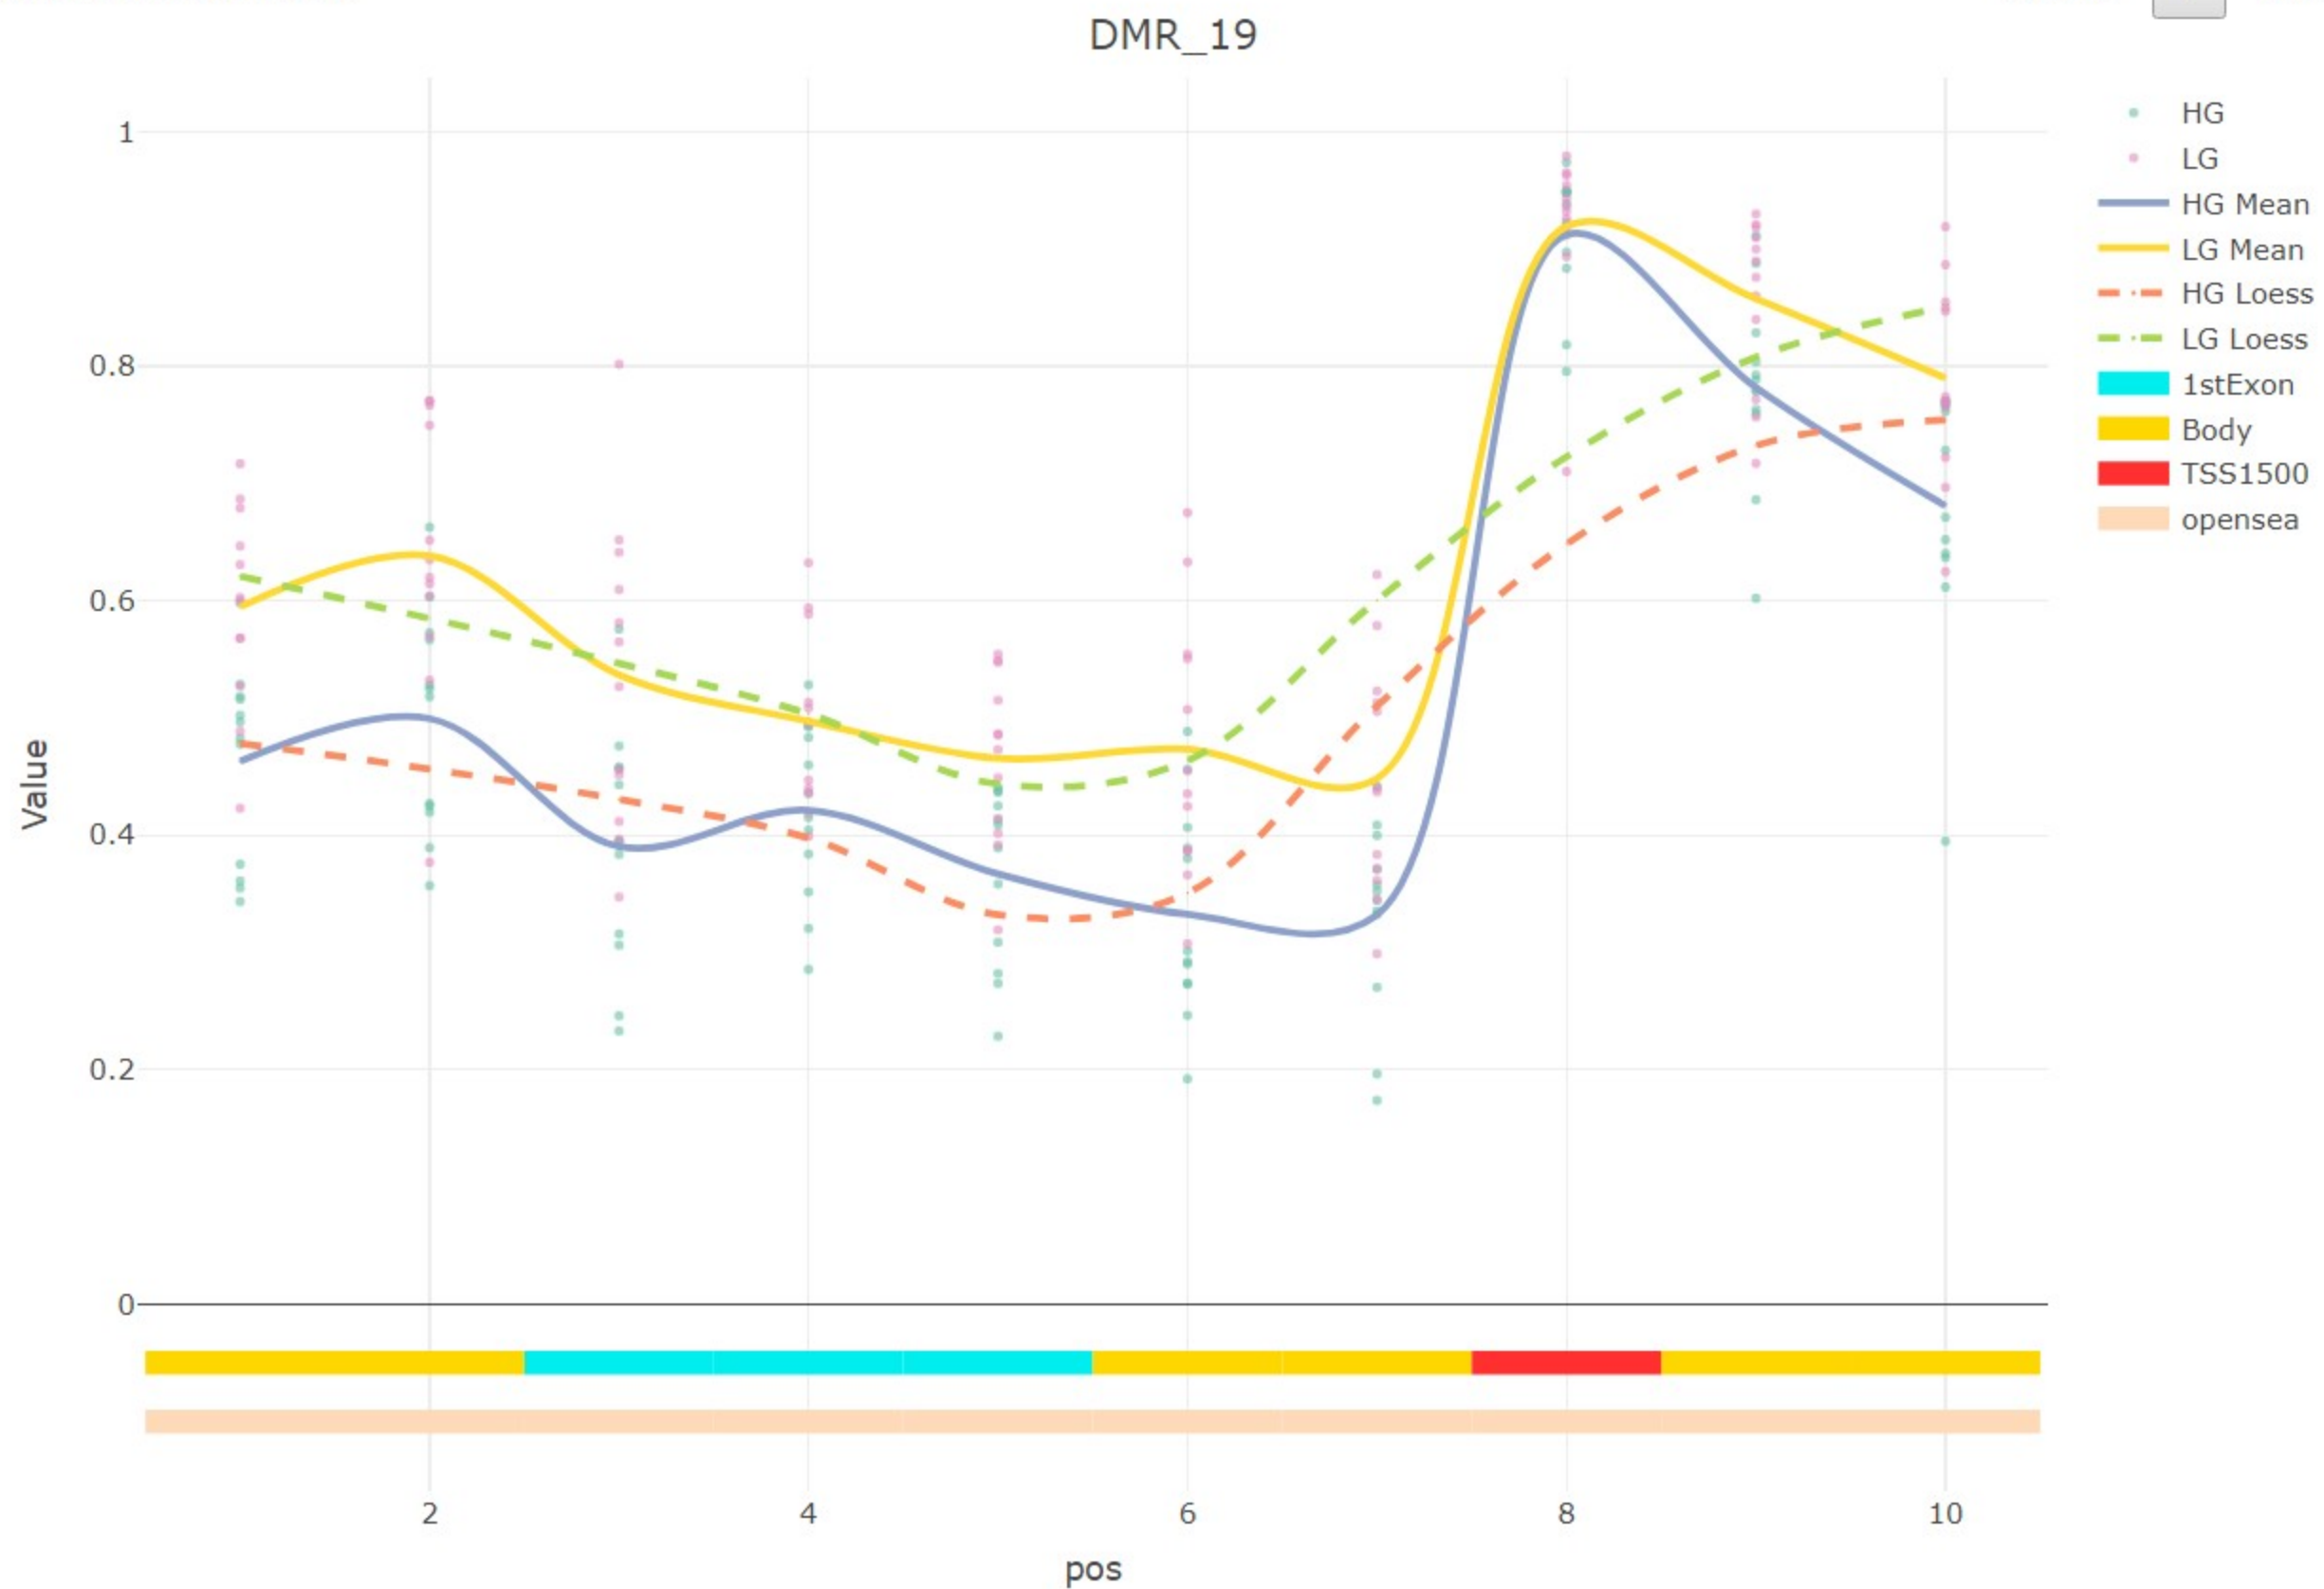

Show  entriesSearch: 

|            | ID         | DMRindex | CHR | MAPINFO  | Strand | Type | gene | feature | cgi    | feat.cgi    |
|------------|------------|----------|-----|----------|--------|------|------|---------|--------|-------------|
| cg00872984 | cg00872984 | DMR_1    | 6   | 32063991 | F      | I    | TNXB | Body    | island | Body-island |
| cg27387193 | cg27387193 | DMR_1    | 6   | 32064032 | F      | I    | TNXB | Body    | island | Body-island |
| cg17662683 | cg17662683 | DMR_1    | 6   | 32064146 | F      | I    | TNXB | Body    | island | Body-island |
| cg01569346 | cg01569346 | DMR_1    | 6   | 32064148 | F      | I    | TNXB | Body    | island | Body-island |
| cg03421270 | cg03421270 | DMR_1    | 6   | 32064153 | F      | II   | TNXB | Body    | island | Body-island |
| cg19267551 | cg19267551 | DMR_1    | 6   | 32064161 | F      | I    | TNXB | Body    | island | Body-island |
| cg01992382 | cg01992382 | DMR_1    | 6   | 32064212 | F      | I    | TNXB | Body    | island | Body-island |
| cg16834823 | cg16834823 | DMR_1    | 6   | 32064218 | F      | I    | TNXB | Body    | island | Body-island |
| cg00525277 | cg00525277 | DMR_1    | 6   | 32064239 | F      | I    | TNXB | Body    | island | Body-island |
| cg10890302 | cg10890302 | DMR_1    | 6   | 32064246 | F      | I    | TNXB | Body    | island | Body-island |
| cg10923662 | cg10923662 | DMR_1    | 6   | 32064258 | F      | I    | TNXB | Body    | island | Body-island |
| cg03556669 | cg03556669 | DMR_1    | 6   | 32064497 | F      | I    | TNXB | Body    | island | Body-island |
| cg15196197 | cg15196197 | DMR_1    | 6   | 32064573 | F      | I    | TNXB | Body    | island | Body-island |
| cg13400512 | cg13400512 | DMR_1    | 6   | 32064578 | F      | I    | TNXB | Body    | island | Body-island |
| cg12694372 | cg12694372 | DMR_1    | 6   | 32064582 | F      | I    | TNXB | Body    | island | Body-island |
| cg15265085 | cg15265085 | DMR_1    | 6   | 32064588 | F      | I    | TNXB | Body    | island | Body-island |
| cg21642103 | cg21642103 | DMR_1    | 6   | 32064656 | F      | I    | TNXB | Body    | island | Body-island |
| cg13698691 | cg13698691 | DMR_1    | 6   | 32064660 | F      | I    | TNXB | Body    | island | Body-island |
| cg21342636 | cg21342636 | DMR_1    | 6   | 32064671 | F      | II   | TNXB | Body    | island | Body-island |
| cg01485117 | cg01485117 | DMR_1    | 6   | 32064677 | F      | I    | TNXB | Body    | island | Body-island |
| cg27081346 | cg27081346 | DMR_1    | 6   | 32064692 | F      | I    | TNXB | Body    | island | Body-island |

Showing 1 to 21 of 21 entries

Previous

1

Next

## DMR\_1

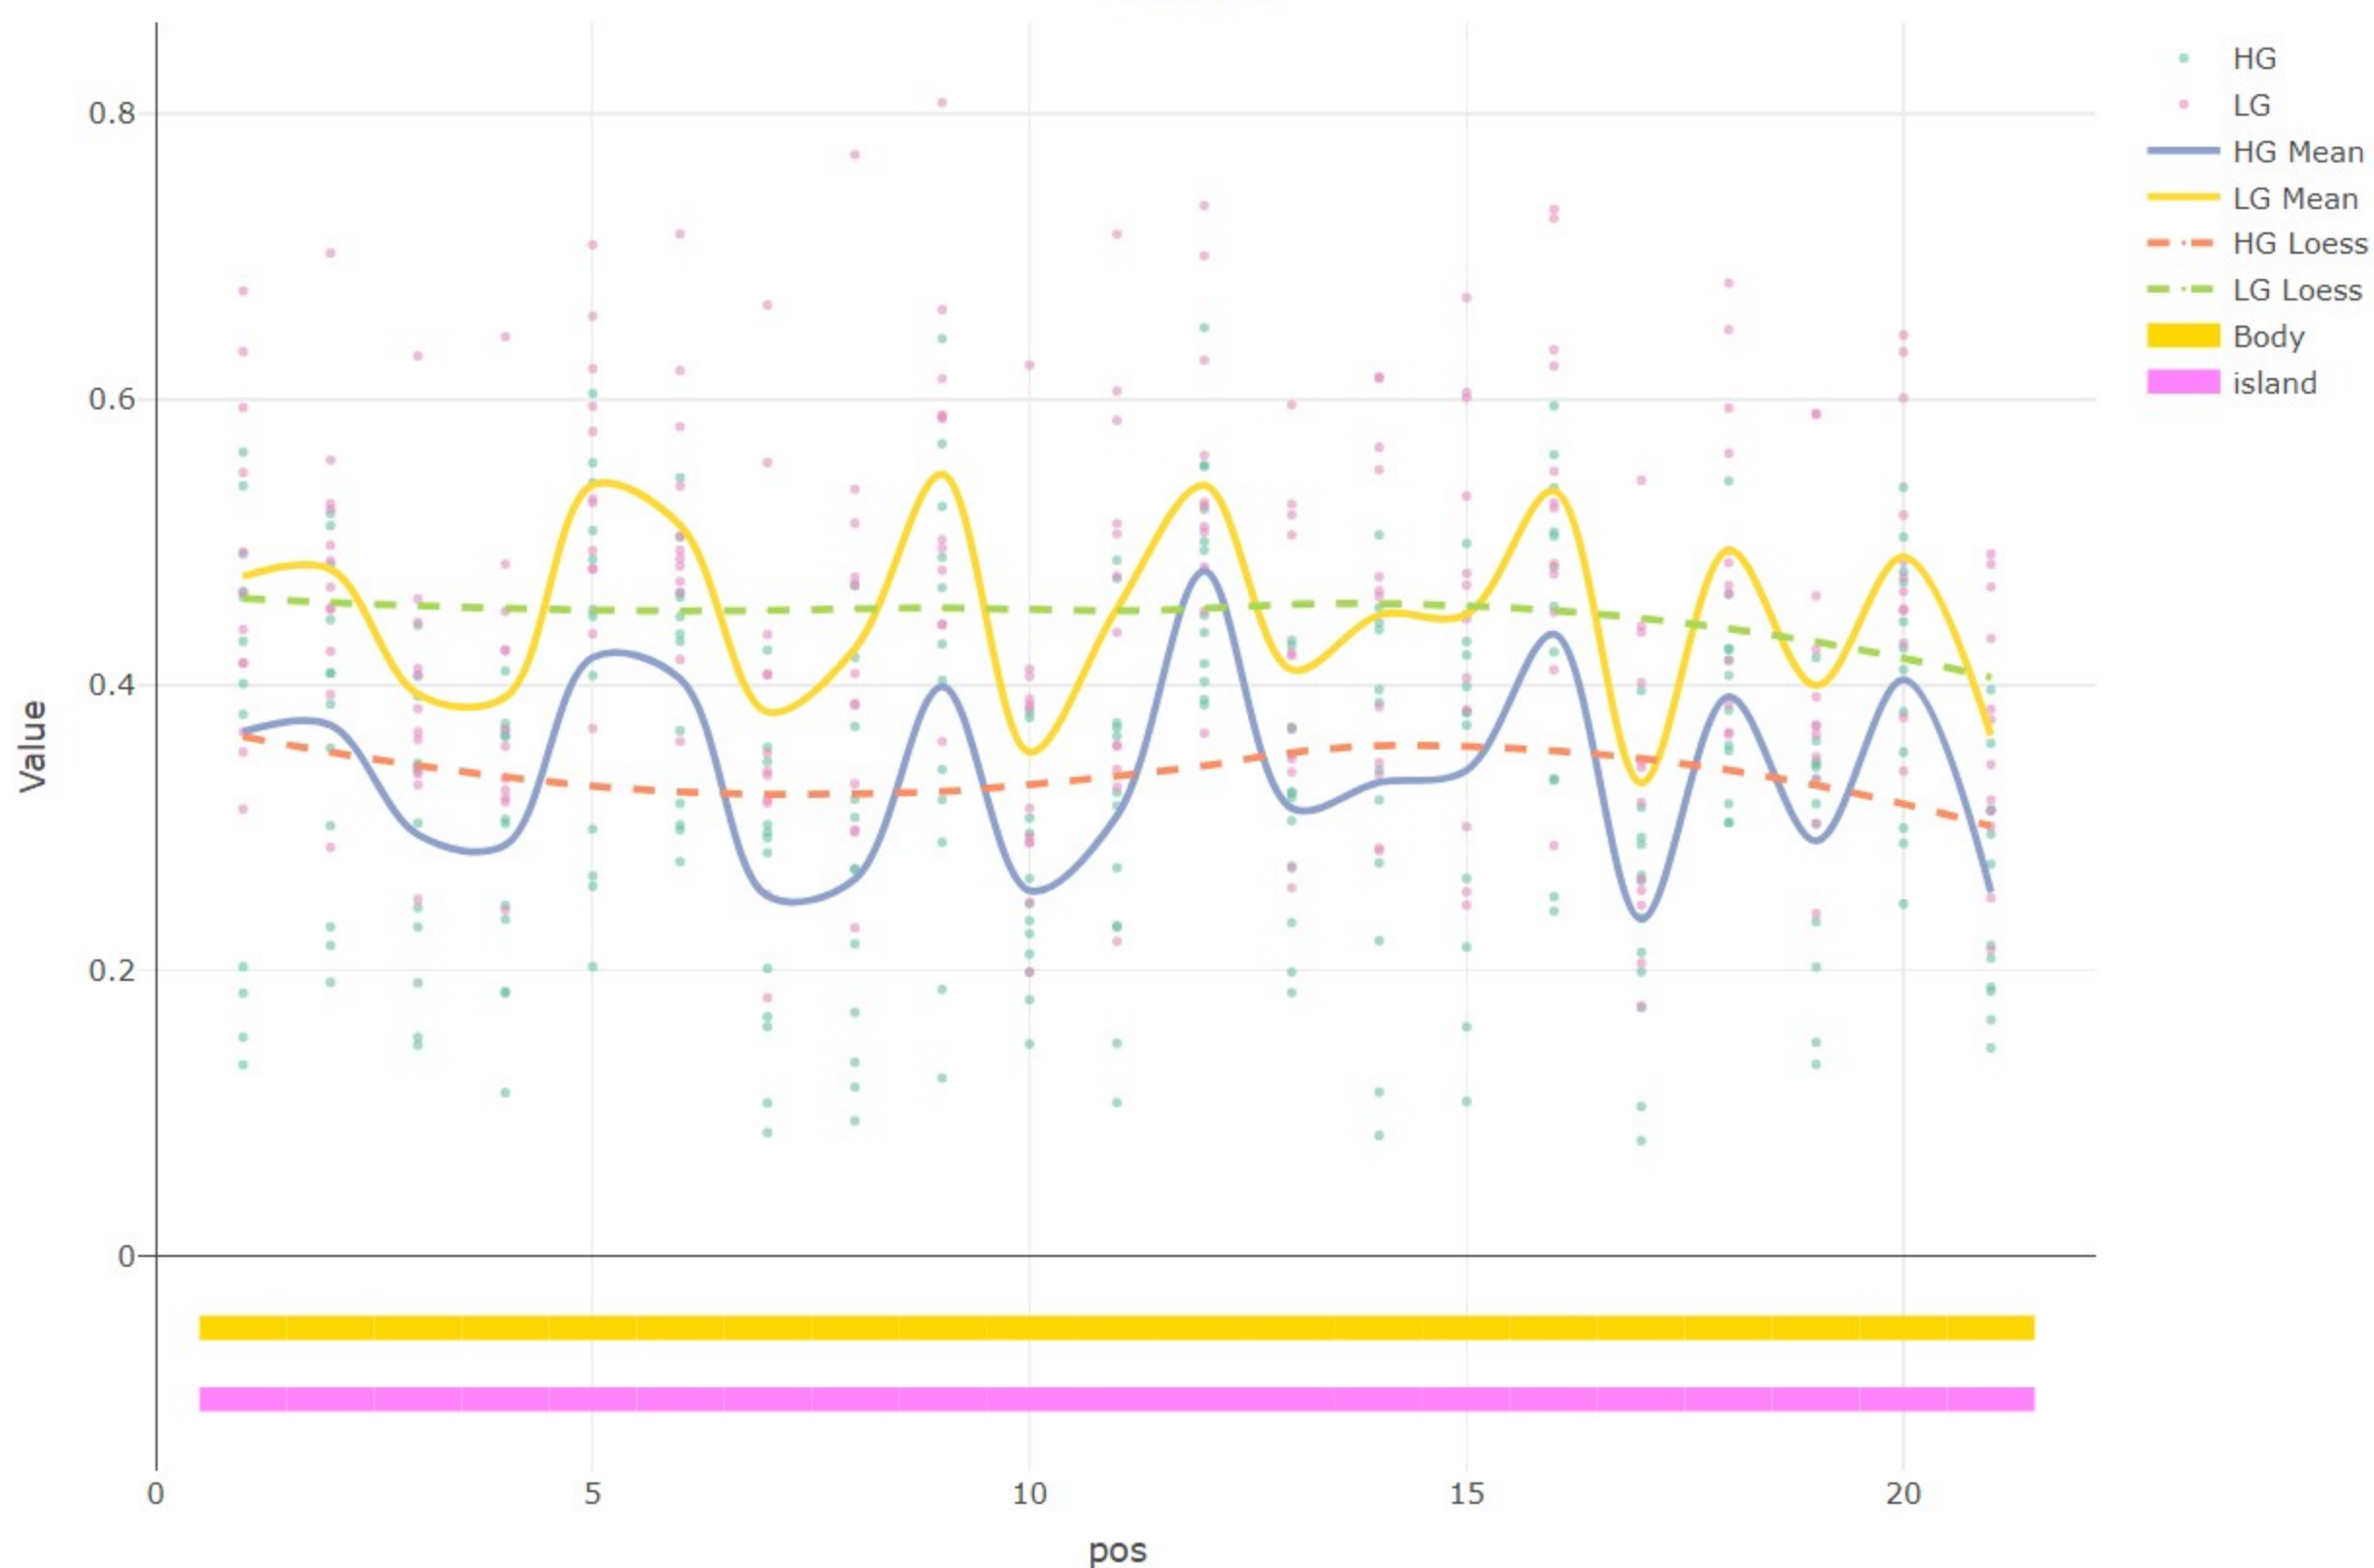

Show **8** entriesSearch: 

| ID         | DMRindex   | CHR    | MAPINFO | Strand   | Type | gene | feature | cgi     | feat.cgi |                 |
|------------|------------|--------|---------|----------|------|------|---------|---------|----------|-----------------|
| cg26334154 | cg26334154 | DMR_30 | 3       | 42132310 | F    | II   | TRAK1   | TSS1500 | opensea  | TSS1500-opensea |
| cg25494254 | cg25494254 | DMR_30 | 3       | 42132371 | F    | II   | TRAK1   | TSS1500 | opensea  | TSS1500-opensea |
| cg04028605 | cg04028605 | DMR_30 | 3       | 42132410 | F    | II   | TRAK1   | TSS1500 | opensea  | TSS1500-opensea |
| cg14664089 | cg14664089 | DMR_30 | 3       | 42132470 | F    | II   | TRAK1   | TSS1500 | opensea  | TSS1500-opensea |
| cg09899825 | cg09899825 | DMR_30 | 3       | 42132646 | R    | II   | TRAK1   | TSS200  | opensea  | TSS200-opensea  |
| cg06890569 | cg06890569 | DMR_30 | 3       | 42132667 | R    | II   | TRAK1   | TSS200  | opensea  | TSS200-opensea  |
| cg01486558 | cg01486558 | DMR_30 | 3       | 42132870 | R    | II   | TRAK1   | 1stExon | opensea  | 1stExon-opensea |
| cg09654300 | cg09654300 | DMR_30 | 3       | 42132991 | R    | II   | TRAK1   | 1stExon | opensea  | 1stExon-opensea |

Showing 1 to 8 of 8 entries

Previous **1** Next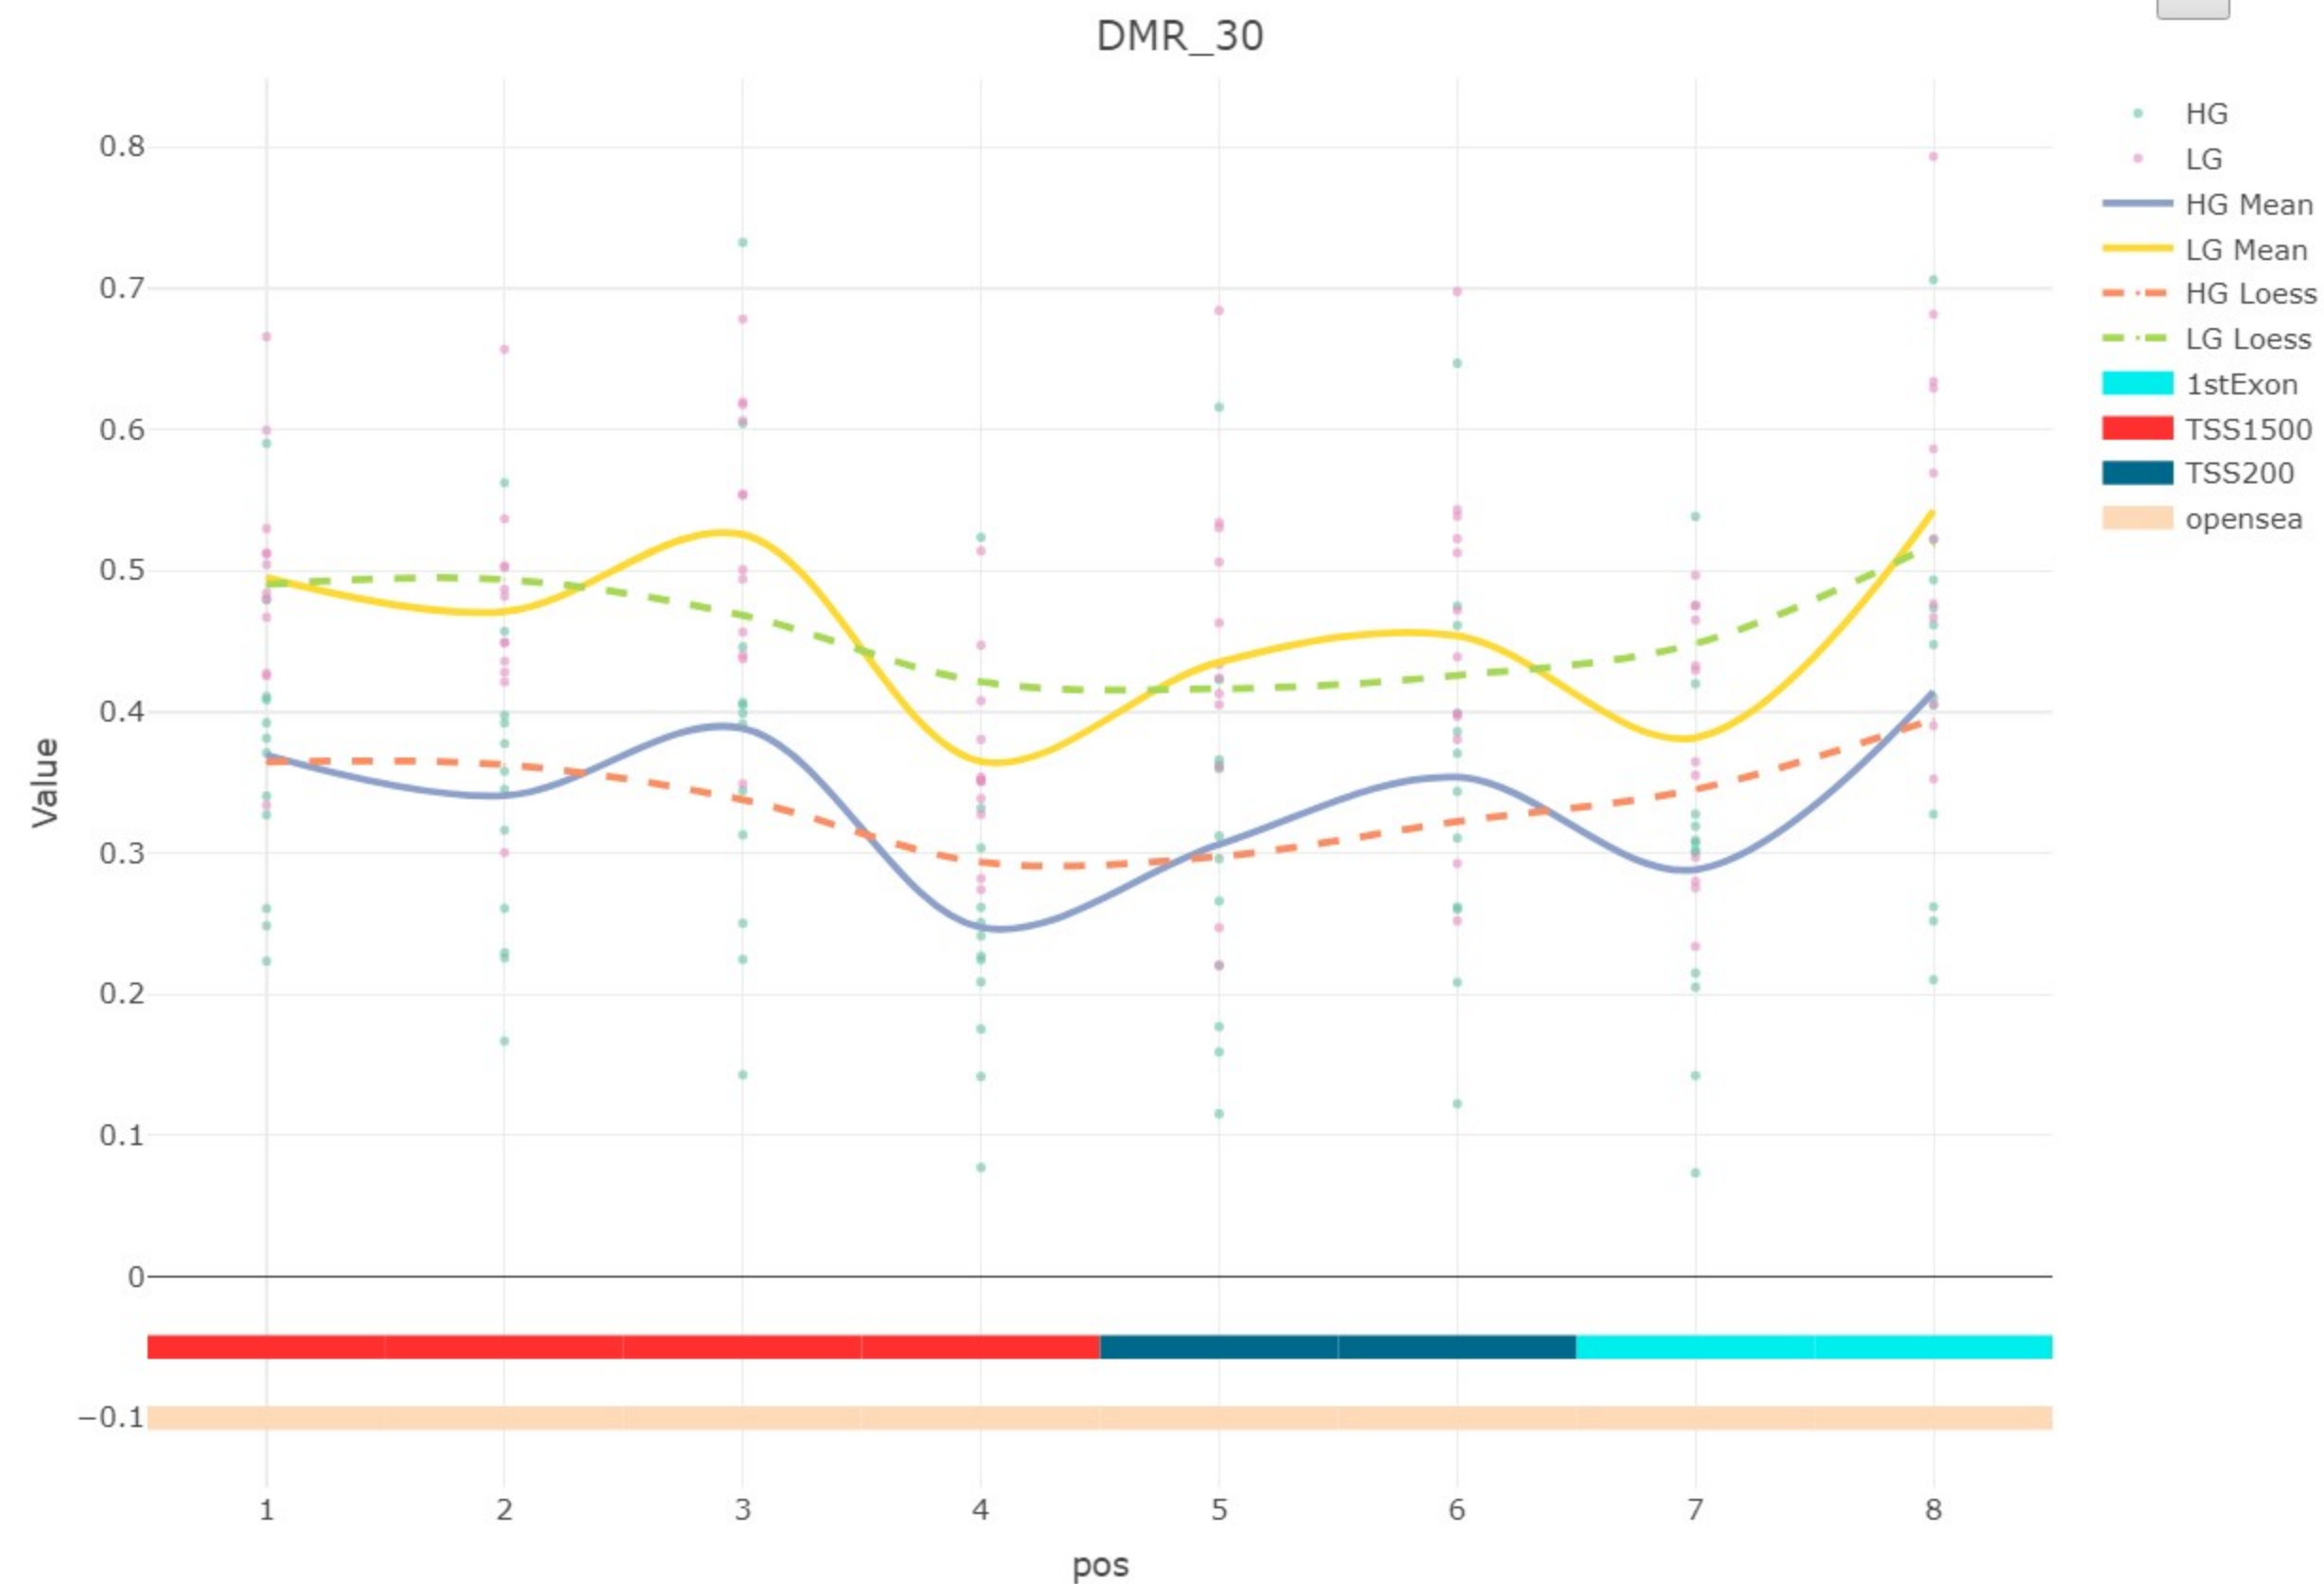

**Supplementary Figure 1** Differentially methylated regions in the high-grade vs. low-grade areas in desmoplastic infantile astrocytoma/ganglioglioma. Specific probe ID, chromosome location (CHR), corresponding gene, and specific probe location in relation to the corresponding gene are indicated and plotted. Value: beta value.
